# Supplementary material
Source: HighWire-hosted journal article supplement (doi:10.1101/rna.079752.123)
Supplement: Supplemental_Legends.docx [file Supplemental_Legends.docx]

**FIGURE S1.** (*A*) Base frequency in barcodes and N50 sequences of the library constructs sequenced prior to transformation into yeast. (*B* and *C*) Results for the average of the two replicates (n = 141,710). (*B*) Splicing efficiencies of the shortened *ACT1* intron control for specified ranges of barcode GC content as determined by sequencing. Gold diamonds represent the mean for each group. (*C*) Total number of RNA transcripts versus DNA reads per N50 library variant. Pearson’s correlation coefficient is denoted by R.

**FIGURE S2.** (*A*-*C*) The minimum free energy (MFE) of the main predicted secondary structure for the (*A*) ‘nearby’ (15 bases each side of N50, 80 bases total), (*B*) ‘barcode’ (start of the barcode through 15 bases 3’ of the N50, 124 bases total) or (*C*) ‘upstream’ (start of the 5’ UTR through 15 bases downstream of the N50, 174 bases total) context versus splicing efficiency of each variant. Pearson’s correlation coefficient is denoted by R.

**FIGURE S3.** (*A*-*E*) Results for the average of the two replicates (n = 141,710). (*A*-*D*) Average values for all library variants that displayed low (under 20%), moderate (20 to 80%) or high (above 80%) splicing efficiency in both replicates or (*A*-*C*) that contain a GUGUGU hexamer. (*A-C*) The base pair probability of each base in (*A*) the N50, (*B*) the AC repeat in the 5’ UTR or (*C*) the 5’ splice sequencepairing with any other base, calculated using the sequence spanning from the transcriptional start site through 15 bases downstream of the intron, 258 bases total. (*D*) The GC content of each 10-nucleotide-long window starting at the 5’ end of the N50. (*E*) Splicing efficiencies of the intron library variants for specified ranges of GC content across the full length of the N50 as determined by sequencing. Gold diamonds represent the mean for each group.

**FIGURE S4.** (*A*) Motifs that were enriched among the variants with unique barcodes and with unique N50 sequences that displayed low (under 20%), moderate (20 to 80%) or high (above 80%) splicing efficiency in both replicates relative to a randomization of those sequences with p-values < 0.05. (*B*) The number of 5’ and 3’ cryptically spliced barcode variants at each position of the shortened *ACT1* intron.

**TABLE S1.** Overview of the number of unique cDNA and DNA reads sequenced and filtered for the intron library in two independently grown replicates. Abbreviations: barcode (BC), unique molecular identifier (UMI).

**TABLE S2.** The average splicing efficiency (SE), RNA abundance, minimum free energy (MFE) of the main predicted secondary structure for all N50s containing each possible hexamer and averaged for both replicates as well as the number of N50s containing each hexamer and their rank from highest (#1) to lowest (#4096). The sequence used for the ‘upstream’ context spanned from the start of the 5’ UTR through 15 bases downstream of the N50, 174 bases total, and the ‘nearby’ context spanned from 15 bases upstream to 15 bases downstream of the N50, 80 bases total.

**TABLE S3.** Occurrences and frequency (ƒ) of each possible pentamer in native *S*. *Cerevisiae* introns as well as their enrichment relative to 5 M randomly shuffled pentamers that have the same nucleotide composition of introns, coding sequences (CDS) and non-coding sequences (NCS) found in the native genome. Enrichment is presented as log2 and ranked from highest (rank 1) to lowest (rank 1024).

**TABLE S4.** Pearson’s correlation (R) of splicing efficiency with secondary structure parameters across several regions of the intron library.The sequence used for the ‘nearby’ context spanned from 15 bases upstream to 15 bases downstream of the N50, 80 bases total; the ‘barcode’ context spanned from the start of the barcode through 15 bases downstream of the N50, 124 bases total; the ‘upstream’ context spanned from the start of the 5’ UTR through 15 bases downstream of the N50, 174 bases total; and the ‘broad’ context spanned from the start of the 5’ UTR through 15 bases downstream of the intron, 259 bases total.Asterisks denote p-values < 5-16.

**TABLE S5.** Overview of convolutional neural network (CNN) model architectures. Each architecture was individually adapted to the length of the input sequence by adding or removing pooling layers. Each input sequence was used as a sequence in a one-hot encoding (a) or with additional structural channels of sequence plus accessibility (b) or sequence plus five structural elements (c). All models use 200 kernels, convolutional kernel length of 15. The bulleted model parameters appear in the order they were applied to each model. Steps that differ across the three sequence inputs are bold and underlined. Additional terms and abbreviations: the N50 sequence (input sequence #1), a 174 bp sequence from the start of the 5’ UTR through 15 bp 3' of the N50 (input sequence #2), a 228 bp sequence from the start of the 5’ UTR through the 15 bp 3’ of the intron (input sequence #3) learning rate (Lr), pooling width and stride (W), batch normalization layer (batch norm), dimension of the key, query and value embeddings used in the attention layer (dim. embedding), residual convolutional layer with residual skip connection (residual convolutions), convolutional layer with dilated kernels (dilated convolutions) and width/size of the kernels in the convolutional layer (L).

**TABLE S6.** All data for N50 variants in two biological replicates. Abbreviations: minimum free energy (MFE), lowest energy structure in ensemble (main) of all predicted RNA structures (Ens), frequency (Freq), div (diversity), replicate 1 (r1), replicate 2 (r2), number of RNA transcripts (RNA), number of DNA reads (DNA), splicing efficiency (SE), cryptically spliced transcripts (cryp), splicing efficiency including cryptically spliced transcripts in total (SE_w_cryp), proportion of cryptically spliced vs total transcripts (cryp_SE), abundance (ab), the bottom (low_hex) or top 10 hexamers (top_hex) ranked by splicing efficiency, the motifs that were enriched in variants with low (low_motif), moderate (mod_motif) or high (high_motif) splicing efficiency, average between both replicates (ave), the motifs that were previously reported from native yeast sequences to reduce or (Yof_low) enhance (Yof_high) splicing efficiency, canonical 5' splice site sequence (fiveP_ss) or branch point sequence (BP).

**TABLE S7.** Overview of primers and oligos used for creation, analysis and sequencing of constructs. The letter N represents any base (*i.e*. A, C, G or T) and the letter V represents any base except thymine (*i.e*. A, C or G).
