# Supplementary material
Source: HighWire-hosted journal article supplement (doi:10.1101/rna.079752.123)
Supplement: Supplemental_TableS1.docx [file Supplemental_TableS1.docx]

**Table S1.** Overview of the number of unique cDNA and DNA reads sequenced and filtered for the intron library in two independently grown replicates. Abbreviations: barcode (BC), unique molecular identifier (UMI).

| **cDNA** | **Rep 1** | **Rep 2** |  | **DNA** | **Rep 1** | **Rep 2** |
| --- | --- | --- | --- | --- | --- | --- |
| **total reads aligned** (BC + junction + UMI) | 7904941 | 6718692 |  | **total reads aligned** (BC) | 18561644 | 38389165 |
| **unique BC variants** (post UMI deduplication) | 304707 | 274039 |  | **unique BC variants** | 311467 | 316373 |
| **unique BC & N50 variants** | 301777 | 271652 |  | **unique BC variants** (with 20+ reads) | 224776 | 246473 |
| **unique variants** (3+ transcripts) | 208273 | 225383 |  | **unique BC & N50 variants** (20+ reads) | 178274 | 245023 |
| **UMIs per variant** | 16 | 16 |  |  |  |  |
| **UMIs per variant, unspliced** | 11 | 11 |  | **cDNA & DNA** | **Rep 1** | **Rep 2** |
| **UMIs per variant, spliced** | 22 | 22 |  | **unique variants** | 152514 | 193200 |
| **reads per UMI** | 6 | 4 |  | **overlap between both replicates** | | |
| **UMI saturation** (%) | 94 | 94 |  | **unique variants** | 141710 | |
