# Supplementary material
Source: HighWire-hosted journal article supplement (doi:10.1101/rna.079752.123)
Supplement: Supplemental_TableS2.xlsx [file Supplemental_TableS2.xlsx]

## Sheet: hexamers
TABLE S2. The average splicing efficiency (SE), RNA abundance, minimum free energy (MFE) of the main predicted secondary structure for all N50s containing each possible hexamer and averaged for both replicates as well as the number of N50s containing each hexamer and their rank from highest (#1) to lowest (#4096). The sequence used for the ‘upstream’ context spanned from the start of the 5’ UTR t…
		N50s with hexamer in both reps
hexamer	total N50s with hexamer	low (<20% SE)	med (20-80% SE)	high (>80% SE)	total in groups	splicing efficiency	SE rank	RNA abundance	RNA abundance rank	upstream MFE	nearby MFE		2.5 standard deviations above the mean	2.5 standard deviations below the mean
UACACA	613	78	273	203	554	0.626094	1	0.491285	4	-29.7144	-14.5382
UAAUCC	865	129	346	317	792	0.624652	2	0.491773	3	-30.0435	-14.5824
AUUAAA	1372	188	609	472	1269	0.624318	3	0.462782	225	-28.6937	-13.3
UAAACC	622	84	264	204	552	0.619807	4	0.485863	8	-30.2181	-14.7784
AAACAA	538	81	204	182	467	0.619555	5	0.447035	825	-29.0684	-13.7143
UAAACA	775	105	320	256	681	0.617294	6	0.455296	445	-29.0796	-14.0607
CAAUAA	769	114	321	251	686	0.617054	7	0.480982	19	-28.9699	-13.8141
UAUAAA	1408	199	561	482	1242	0.616113	8	0.461081	272	-28.9056	-13.4645
AUAUUA	2141	298	909	729	1936	0.615436	9	0.480515	21	-29.0787	-13.6979
AUAUCA	1122	161	456	395	1012	0.615188	10	0.480873	20	-29.2796	-14.5213
AACAAA	511	69	219	165	453	0.613997	11	0.468349	135	-29.133	-14.0961
AAUACA	752	112	318	257	687	0.612755	12	0.478328	29	-28.9698	-13.9263
UAUUAA	2101	288	912	686	1886	0.612651	13	0.479878	24	-29.0851	-13.4959
CACUAA	583	87	248	198	533	0.612059	14	0.478968	25	-29.5804	-14.4667
ACCCAA	344	41	166	99	306	0.611551	15	0.456775	382	-30.4959	-15.6977
AAAAAC	513	65	234	164	463	0.611325	16	0.444799	960	-28.7855	-13.5588
UAAAUA	1382	195	600	449	1244	0.611045	17	0.448625	737	-28.6029	-13.4373
AAUUCA	1156	163	506	383	1052	0.610946	18	0.459579	305	-29.1852	-13.7836
AAACCA	420	56	187	135	378	0.61073	19	0.476558	41	-29.5888	-14.5503
CAUAAA	804	108	363	241	712	0.610192	20	0.461988	249	-29.1225	-14.0058
AUAUAA	1403	209	574	476	1259	0.609656	21	0.461737	258	-28.7322	-13.6155
AUCCAA	582	82	261	178	521	0.609168	22	0.47196	86	-29.6887	-14.6725
UAUCAU	1533	211	665	500	1376	0.608917	23	0.471731	89	-29.5811	-14.304
AAUCCA	581	86	241	187	514	0.608827	24	0.460788	280	-29.8805	-14.5718
UUAAAU	2125	327	900	717	1944	0.608737	25	0.459279	312	-28.8528	-13.3712
ACAUAA	750	115	320	242	677	0.608731	26	0.458829	329	-29.5629	-14.3155
AAUUUA	2118	318	867	705	1890	0.608338	27	0.478636	28	-29.0206	-13.5294
CCCAUA	501	66	238	145	449	0.608299	28	0.469092	122	-31.0559	-15.8704
AUCAUA	1094	163	463	336	962	0.60822	29	0.44429	982	-29.4354	-14.2847
UAAUAU	1968	291	835	638	1764	0.608067	30	0.464377	200	-29.0987	-13.589
AACCCA	363	47	162	110	319	0.607865	31	0.445657	910	-30.6161	-15.503
CAUAUA	1105	169	455	372	996	0.607799	32	0.45372	509	-29.5207	-14.5239
UUUUAA	2981	462	1197	1002	2661	0.607762	33	0.454345	483	-28.9393	-13.3574
AUACAA	746	107	318	249	674	0.607731	34	0.452371	567	-28.8401	-13.9411
UCAUAA	1111	162	444	362	968	0.607713	35	0.461627	262	-29.1693	-13.9602
CAACAA	402	55	177	127	359	0.607307	36	0.423241	2699	-29.4647	-14.1184
UUAUUA	2892	424	1226	928	2578	0.607295	37	0.463143	218	-29.1359	-13.6078
AAUAAC	746	105	317	262	684	0.606441	38	0.470327	106	-29.0667	-13.9542
AAUAUC	1158	177	499	372	1048	0.606235	39	0.472003	84	-29.4993	-14.4156
UUAAAA	1330	209	546	445	1200	0.606121	40	0.464537	195	-28.6328	-13.2845
CAUAAU	1074	168	423	362	953	0.606099	41	0.469736	112	-29.2458	-14.0991
UAACCC	511	67	236	158	461	0.605952	42	0.442877	1069	-30.6619	-15.3577
UUUUCA	2470	373	1045	801	2219	0.605716	43	0.470003	109	-29.3897	-13.8251
UUUAAA	1999	299	829	659	1787	0.605563	44	0.44516	937	-28.7824	-13.3361
AUUUAA	1994	291	863	633	1787	0.605491	45	0.47875	26	-28.7805	-13.3723
AAAUUU	2166	312	902	705	1919	0.605096	46	0.451909	588	-28.8982	-13.2761
UUUUAU	4338	652	1845	1404	3901	0.604625	47	0.476526	42	-29.3497	-13.5281
UAAUUC	1526	218	673	489	1380	0.604383	48	0.47599	50	-29.5051	-13.8815
UAUUAU	2833	428	1183	927	2538	0.604374	49	0.46903	124	-29.1067	-13.6487
AUUAUA	1970	291	825	640	1756	0.604253	50	0.462644	228	-29.1537	-13.7272
UUAUAU	3003	443	1281	972	2696	0.60396	51	0.473791	68	-29.3191	-13.819
UUUUUU	4562	702	1906	1486	4094	0.603697	52	0.46504	185	-29.4762	-13.4473
AUUUAC	1607	234	679	517	1430	0.603312	53	0.469372	118	-29.4277	-14.2003
AUAAAU	1482	216	620	463	1299	0.60328	54	0.457604	359	-28.6822	-13.4307
AUAUAU	1956	286	892	619	1797	0.603266	55	0.468317	138	-29.4292	-14.1646
AUAAUA	1356	207	571	435	1213	0.603263	56	0.458827	330	-28.7896	-13.5684
CCAAUA	603	85	280	181	546	0.602762	57	0.456795	379	-30.441	-14.829
AUAAUC	1144	179	457	380	1016	0.602672	58	0.472246	82	-29.6505	-14.2197
AUUAUU	2859	426	1201	941	2568	0.602641	59	0.474205	64	-29.1563	-13.6258
UAUAUU	3063	454	1326	968	2748	0.602441	60	0.459015	322	-29.4697	-13.8229
ACAAAU	819	122	329	270	721	0.602375	61	0.462332	238	-29.319	-14.0186
CAUUAC	927	134	396	289	819	0.602313	62	0.461883	253	-30.1224	-15.0268
AUAACU	1055	153	462	336	951	0.602289	63	0.464362	201	-29.4279	-14.2888
UGAUAA	1518	227	643	485	1355	0.60225	64	0.454374	482	-29.741	-14.1796
UAUACU	1409	213	611	449	1273	0.602123	65	0.472924	74	-29.9801	-14.7875
AUUUAU	2966	452	1241	955	2648	0.602047	66	0.473556	70	-29.4011	-13.6446
AAAAAU	958	146	389	316	851	0.601892	67	0.477674	33	-28.3731	-13.0825
UAAAAA	876	141	353	294	788	0.6018	68	0.466555	166	-28.4953	-13.0799
AAAACA	562	78	241	182	501	0.601595	69	0.445548	919	-28.9338	-13.7614
CAUCAU	969	148	430	285	863	0.601376	70	0.430557	2068	-30.188	-14.9709
UCAUAU	1594	244	685	502	1431	0.601132	71	0.443463	1032	-29.6259	-14.2947
CAAAGA	641	103	257	205	565	0.60101	72	0.454657	467	-29.9018	-14.7382
AUUUUU	4297	640	1830	1343	3813	0.600877	73	0.462482	233	-29.2453	-13.4754
CUCAUA	850	126	359	283	768	0.600665	74	0.462024	247	-30.2309	-14.9967
AUAACA	731	112	298	244	654	0.600597	75	0.470521	104	-29.2297	-14.1376
GAAUAU	1745	251	786	536	1573	0.600504	76	0.469935	110	-29.981	-14.9725
UUUUUA	4312	669	1817	1372	3858	0.600492	77	0.455923	415	-29.2194	-13.5336
UUAAUU	3034	479	1247	995	2721	0.600485	78	0.477623	34	-29.0077	-13.4402
CCAUAA	605	90	254	198	542	0.600402	79	0.451626	604	-29.7251	-14.4923
AUUUUC	2363	367	1008	747	2122	0.600209	80	0.470867	99	-29.6402	-13.9649
AGAUAU	1774	273	782	566	1621	0.599985	81	0.475612	52	-29.8411	-14.4487
UAAUAC	1015	158	429	316	903	0.59993	82	0.458804	331	-29.4131	-14.2519
CUAAAC	584	91	251	182	524	0.599863	83	0.464436	197	-30.1746	-14.6046
UAUAAU	1999	297	864	623	1784	0.599838	84	0.472887	75	-29.1872	-13.6063
AAAUUC	1177	169	523	371	1063	0.599795	85	0.455073	454	-29.294	-13.8998
AGAUUU	2507	386	1054	801	2241	0.599669	86	0.461346	267	-29.8205	-14.1766
AAUCCC	553	81	238	176	495	0.599574	87	0.450825	648	-31.0635	-15.245
AUAUUU	3124	492	1329	979	2800	0.599557	88	0.452798	547	-29.5159	-13.7794
AUAAUU	2000	307	866	623	1796	0.599239	89	0.473219	73	-28.8691	-13.4075
AUUACC	854	116	384	241	741	0.599201	90	0.454789	461	-30.5159	-15.4486
AUCCGA	767	111	335	246	692	0.599145	91	0.453075	537	-31.2933	-15.7058
AUCAUU	1658	250	732	521	1503	0.599099	92	0.451081	634	-29.5349	-14.0442
UAUAUA	1944	286	817	628	1731	0.599069	93	0.482403	16	-29.3709	-14.0666
UAUUAC	1561	224	694	472	1390	0.599041	94	0.464152	204	-29.6086	-14.3457
AAUUAU	2100	311	867	678	1856	0.598788	95	0.483691	12	-28.8322	-13.449
UCAUUA	1588	257	664	507	1428	0.598681	96	0.454465	477	-29.5934	-14.0608
AUUUUA	2957	459	1228	954	2641	0.598644	97	0.464164	203	-29.1028	-13.5832
CAUAUU	1695	256	724	533	1513	0.5985	98	0.455028	455	-29.8047	-14.5251
AAUUUU	3112	483	1292	1001	2776	0.598459	99	0.462197	242	-28.9936	-13.368
UAAAAU	1381	205	588	445	1238	0.598359	100	0.450917	641	-28.65	-13.2064
GAUAUU	2445	367	1058	752	2177	0.598152	101	0.472227	83	-30.2123	-14.4945
AAUUCU	1553	225	687	482	1394	0.598036	102	0.469609	115	-29.6649	-13.991
UUUAUC	2343	373	978	746	2097	0.598019	103	0.46488	187	-29.6797	-14.1353
UUUUCU	3432	503	1509	1071	3083	0.597924	104	0.449685	690	-30.0712	-14.0357
UUUUAC	2266	336	993	695	2024	0.597858	105	0.448106	762	-29.7152	-14.1773
AUUUCA	1606	244	688	505	1437	0.597855	106	0.480024	22	-29.2916	-13.9115
AGCUUA	1360	201	589	427	1217	0.597829	107	0.477518	35	-30.6648	-15.4079
AAAUAA	1018	156	413	331	900	0.597715	108	0.471917	87	-28.1739	-13.0839
AUUCUU	2325	330	1031	719	2080	0.597698	109	0.447008	827	-29.748	-14.1212
UAUACA	1080	169	458	350	977	0.597678	110	0.457103	370	-29.5077	-14.3888
UAUAAC	1060	169	436	338	943	0.597597	111	0.443592	1024	-29.5532	-14.3772
UUAAAC	1055	164	447	334	945	0.597513	112	0.457787	356	-29.2723	-14.0172
UUAUCA	1615	266	658	528	1452	0.597331	113	0.44716	818	-29.2981	-13.9945
UAAUUU	2942	469	1216	944	2629	0.597298	114	0.467869	149	-29.2532	-13.4458
UUAUUU	4409	651	1929	1361	3941	0.597274	115	0.468832	128	-29.343	-13.494
UUAAUA	2114	312	919	666	1897	0.597216	116	0.457852	354	-28.9862	-13.4987
AUAUCU	1643	243	704	512	1459	0.597157	117	0.449621	694	-29.879	-14.8642
UUUCAA	1649	261	712	525	1498	0.597078	118	0.468419	134	-29.1675	-13.712
UUAUAA	1952	299	826	622	1747	0.596743	119	0.449453	701	-28.9388	-13.4757
CAAAUU	1211	184	530	381	1095	0.596713	120	0.450242	672	-29.3868	-13.7881
CACAUA	608	87	267	194	548	0.596585	121	0.484184	9	-29.6111	-14.8425
AUAAGA	1197	181	518	375	1074	0.59639	122	0.456575	393	-29.609	-14.3338
ACUUAA	1046	159	442	317	918	0.596385	123	0.474687	62	-29.2295	-14.1007
UGAAUA	1548	243	701	499	1443	0.596309	124	0.47344	71	-29.8929	-14.5624
ACUUUU	2325	350	1017	713	2080	0.596254	125	0.451106	631	-29.9878	-14.3367
UAUUUU	4407	676	1901	1376	3953	0.59625	126	0.462106	245	-29.6036	-13.5641
AAUAUG	1787	283	762	559	1604	0.596231	127	0.448961	723	-30.1007	-14.7191
UAGACC	706	100	322	201	623	0.59622	128	0.492976	2	-31.2613	-16.2054
UUUAUA	2885	426	1267	896	2589	0.596189	129	0.475586	53	-29.4802	-13.6429
AUAUAC	1088	168	462	344	974	0.596092	130	0.455447	439	-29.6065	-14.8884
UUUAUU	4466	690	1909	1391	3990	0.596054	131	0.478713	27	-29.3641	-13.4676
UAAUUA	1969	299	874	614	1787	0.595976	132	0.479947	23	-29.0129	-13.4423
AAGACA	676	103	276	217	596	0.595962	133	0.473416	72	-30.2002	-14.561
AUUAAC	1097	173	470	346	989	0.595922	134	0.470214	107	-29.1803	-13.9189
CCAUUA	850	127	366	273	766	0.595829	135	0.441448	1176	-30.3874	-14.7499
GAUUUA	2506	379	1048	783	2210	0.595795	136	0.483647	13	-30.0653	-14.4339
AAUAUU	2217	351	956	700	2007	0.595723	137	0.46089	278	-28.8687	-13.4477
AAAAUU	1426	217	606	449	1272	0.595689	138	0.43745	1462	-28.7368	-13.1764
CACAAA	443	67	189	137	393	0.595624	139	0.468317	139	-29.5911	-14.3577
CUCAUU	1391	195	640	423	1258	0.59562	140	0.438353	1387	-30.2161	-14.6737
UUAUAC	1406	223	575	453	1251	0.595612	141	0.462219	241	-29.8302	-14.6462
CUUAUA	1447	229	620	455	1304	0.595572	142	0.467444	155	-29.7392	-14.4688
UUUUUC	3661	552	1623	1128	3303	0.595495	143	0.454276	487	-29.907	-13.9124
ACACAU	648	91	307	193	591	0.595493	144	0.437475	1459	-30.3032	-14.9086
GAUUUU	3528	537	1505	1108	3150	0.595491	145	0.462375	235	-30.007	-14.2814
GAUAUC	1344	202	567	428	1197	0.595438	146	0.461843	255	-30.3525	-15.3354
ACCCAU	502	72	231	148	451	0.595402	147	0.477067	38	-31.3497	-15.8978
UAACUC	933	127	425	276	828	0.595384	148	0.468253	141	-30.0677	-14.6558
ACAAUA	756	133	306	249	688	0.595366	149	0.454541	473	-29.3631	-14.0391
AAAAUC	770	119	326	242	687	0.595244	150	0.450097	677	-29.2492	-13.8839
GAUAUA	1767	286	770	556	1612	0.595192	151	0.46277	226	-29.8419	-14.5927
UAUUUA	2970	472	1281	902	2655	0.595185	152	0.460056	298	-29.1984	-13.6976
UACACC	532	88	226	169	483	0.595052	153	0.43844	1379	-31.1079	-15.8901
CUAUAC	757	121	332	236	689	0.594915	154	0.466728	163	-30.4037	-15.1984
UCACAU	937	141	417	293	851	0.594705	155	0.45551	433	-30.275	-14.967
AAAUAC	782	117	352	244	713	0.594574	156	0.451932	587	-29.3355	-14.0951
UAUCAG	1443	233	595	465	1293	0.594541	157	0.449327	705	-30.219	-15.0215
UCAUCA	960	147	425	287	859	0.594429	158	0.445158	938	-29.6285	-14.4802
GAAUUC	1349	209	604	411	1224	0.594306	159	0.456783	380	-30.5043	-14.9509
UAGCCA	798	127	341	254	722	0.594255	160	0.469808	111	-31.1093	-15.7032
AACAAG	706	117	302	210	629	0.594224	161	0.453582	518	-29.814	-14.6642
UAAAUU	2095	323	859	664	1846	0.594121	162	0.448364	752	-28.9688	-13.3441
CAAAAU	785	121	345	236	702	0.5941	163	0.430159	2111	-29.1903	-13.8909
UUUAAU	3060	511	1268	959	2738	0.59409	164	0.463999	208	-28.9919	-13.4669
ACAAAA	537	87	228	164	479	0.593952	165	0.462815	223	-29.3019	-14.0716
ACUAAU	1012	155	446	311	912	0.593892	166	0.482719	15	-29.565	-14.3554
CUCAAA	587	86	263	167	516	0.593686	167	0.438722	1353	-29.923	-14.4344
ACACAA	434	68	178	134	380	0.593648	168	0.468894	127	-29.6998	-14.2818
UCUACA	937	142	446	270	858	0.59364	169	0.437856	1421	-30.6462	-14.9833
AAACAG	772	116	333	247	696	0.593615	170	0.450854	646	-29.7818	-14.4221
AAUAAG	1252	185	553	379	1117	0.593507	171	0.460359	294	-29.2937	-13.8527
CUAUUA	1496	222	687	447	1356	0.593501	172	0.472672	78	-30.1338	-14.3689
AACCAU	625	97	268	187	552	0.593499	173	0.43656	1529	-30.0805	-14.7973
UCACAA	654	106	277	211	594	0.593384	174	0.468913	126	-29.3667	-14.1595
UUCACA	943	145	426	286	857	0.593226	175	0.439904	1271	-29.7299	-14.3031
AGAAAC	641	88	293	181	562	0.593111	176	0.467949	148	-29.8736	-14.5645
AAAUAG	1287	190	564	392	1146	0.592918	177	0.429936	2132	-29.5878	-14.1422
AAAUUA	1380	205	599	421	1225	0.592873	178	0.468562	131	-28.807	-13.248
AACUUA	1084	162	473	323	958	0.592822	179	0.484088	11	-29.5287	-14.2495
CUUAAU	1518	235	644	456	1335	0.592799	180	0.484181	10	-29.7885	-14.3541
CAAUUA	1130	166	484	346	996	0.592791	181	0.456172	406	-29.2262	-13.934
UUUAAG	2610	406	1115	794	2315	0.592775	182	0.461614	264	-29.9476	-14.0797
AAUUAA	1448	228	671	449	1348	0.592679	183	0.461305	268	-28.5117	-13.237
UUCAAA	1140	181	490	354	1025	0.592677	184	0.454624	468	-29.1205	-13.6345
CUUUUU	3449	531	1535	1061	3127	0.592641	185	0.450717	653	-30.1942	-14.2757
AUAAAG	1280	202	571	391	1164	0.592605	186	0.444127	991	-29.1891	-13.9433
UCUAUA	1441	236	603	465	1304	0.592506	187	0.462985	222	-30.3941	-14.2247
AAAAUA	1033	174	433	329	936	0.592404	188	0.453257	530	-28.4337	-13.2876
GCAUAU	1453	231	610	458	1299	0.59229	189	0.457678	357	-30.7553	-15.5738
UCAUUU	2432	376	1048	742	2166	0.592275	190	0.437289	1478	-29.7794	-13.9919
UUACAC	902	142	400	270	812	0.592273	191	0.455191	449	-29.8233	-14.7543
CAAAAA	534	79	236	164	479	0.592093	192	0.473729	69	-28.9076	-13.6789
AUACUA	958	165	398	288	851	0.592082	193	0.47173	90	-29.5502	-14.6779
UCAAAA	793	109	362	230	701	0.591946	194	0.441349	1186	-29.0712	-13.6313
AUUAAU	2137	338	905	678	1921	0.591843	195	0.456445	399	-28.9981	-13.5198
AUACUC	898	131	414	259	804	0.591821	196	0.463369	213	-30.2418	-14.8687
GAGAAA	970	159	414	293	866	0.591775	197	0.443546	1025	-29.9869	-14.4246
UUAUCU	2307	358	998	708	2064	0.591738	198	0.462183	243	-29.8407	-14.3582
ACAAGA	638	89	304	189	582	0.591664	199	0.458493	340	-30.1658	-14.8879
CUAUAU	1578	243	691	490	1424	0.591607	200	0.466899	162	-29.7252	-14.3782
CAUAUG	1420	221	621	421	1263	0.59154	201	0.461792	256	-31.1099	-15.6198
AUUCCA	899	133	429	259	821	0.591496	202	0.477378	36	-30.1739	-14.8492
AUACAC	650	104	283	201	588	0.59148	203	0.478119	30	-29.9047	-14.8546
AUUACA	1092	174	483	326	983	0.591431	204	0.452057	581	-29.2518	-14.172
CUAAUA	952	153	437	268	858	0.591377	205	0.426449	2437	-29.7459	-14.3425
AUUUGA	2312	388	928	740	2056	0.591341	206	0.454282	486	-30.0534	-14.465
UUUCAC	1362	219	585	421	1225	0.591312	207	0.455481	436	-30.1131	-14.4258
UUUAAC	1541	249	644	488	1381	0.591254	208	0.457117	368	-29.4774	-13.9312
UACAUA	1101	172	489	332	993	0.591247	209	0.475204	59	-30.248	-14.9043
AAUCUC	948	147	423	283	853	0.591246	210	0.460916	276	-30.4384	-14.7047
AGAACC	563	92	230	180	502	0.591236	211	0.451252	625	-31.2496	-16.2528
ACUUUA	1545	236	716	468	1420	0.591163	212	0.454913	459	-29.7916	-14.3747
AUAAAA	989	156	404	313	873	0.591138	213	0.429487	2179	-28.3809	-13.1149
AUACAU	1080	176	443	349	968	0.591089	214	0.466333	169	-29.8416	-14.8264
AUAACC	600	87	264	175	526	0.591033	215	0.437824	1425	-30.0111	-15.1203
AAUAAU	1447	241	629	439	1309	0.59096	216	0.476497	43	-28.7323	-13.3946
UUUCUA	2193	331	968	658	1957	0.590928	217	0.444226	986	-30.128	-14.4016
CAAUCU	905	137	418	271	826	0.590772	218	0.458839	328	-30.3446	-14.9376
GAUAAU	1708	292	720	533	1545	0.590456	219	0.463704	210	-29.7723	-14.3612
UUCCAA	796	120	359	236	715	0.590412	220	0.466716	164	-30.5875	-14.7924
UAGAUU	2416	396	1035	740	2171	0.590341	221	0.43079	2047	-30.2008	-14.4693
ACUCAU	893	135	388	275	798	0.590298	222	0.455571	430	-30.1901	-14.7956
AAUCUU	1634	264	685	505	1454	0.590293	223	0.47269	77	-29.8552	-14.2556
UUGAUA	2198	350	923	678	1951	0.590283	224	0.45042	665	-29.9164	-14.4352
UACAAA	751	125	314	240	679	0.590193	225	0.440374	1245	-29.5482	-14.1694
UCAAUU	1671	266	692	522	1480	0.590141	226	0.468977	125	-29.3943	-13.8821
CUACAC	524	78	255	144	477	0.590121	227	0.4327	1865	-30.9464	-15.6867
ACCUAC	496	82	205	152	439	0.590104	228	0.46936	119	-30.9505	-15.9836
UAAACU	1011	157	441	301	899	0.590006	229	0.470698	100	-29.681	-14.1932
UAAGAC	923	149	396	283	828	0.589996	230	0.462763	227	-30.2617	-14.9343
AAUAUA	1347	199	611	397	1207	0.589896	231	0.45109	633	-29.0867	-14.0077
CAGUAA	965	130	439	275	844	0.58983	232	0.461211	271	-29.8834	-14.6269
AAGAUA	1214	179	525	365	1069	0.589803	233	0.450315	668	-29.935	-14.3361
AUCAAU	1082	167	476	339	982	0.589634	234	0.464385	199	-29.4282	-14.2343
AGCUUC	1227	186	570	370	1126	0.589615	235	0.434463	1713	-31.2574	-15.6879
CACUAU	876	123	401	263	787	0.589591	236	0.461902	251	-30.0541	-14.7645
CUAAUC	851	142	366	276	784	0.58954	237	0.443141	1051	-30.3493	-14.7764
AAGACU	932	149	402	285	836	0.589538	238	0.433737	1785	-30.1885	-14.9541
UAUAGA	1642	241	749	475	1465	0.589517	239	0.467008	161	-30.6816	-14.7152
CUUUAA	1546	253	660	476	1389	0.589485	240	0.457935	352	-29.6601	-14.368
UUAAUC	1588	253	682	484	1419	0.589448	241	0.467867	150	-29.5497	-13.9366
UCAAAC	595	95	264	183	542	0.5894	242	0.475881	51	-29.6153	-14.5392
GAAUAA	1186	185	552	354	1091	0.589369	243	0.471459	93	-29.1748	-13.9954
CUCACA	613	93	279	181	553	0.589347	244	0.435847	1581	-30.6144	-15.3857
UAAUAG	1770	276	784	526	1586	0.589312	245	0.441932	1145	-29.9342	-14.3516
AUAUUG	2600	410	1138	774	2322	0.58929	246	0.451311	622	-30.2762	-14.44
UUCUUU	3453	531	1569	1021	3121	0.589227	247	0.459984	301	-29.9898	-13.9514
AAACUC	634	104	269	200	573	0.589198	248	0.448261	756	-30.1527	-14.7244
ACCGAA	552	82	259	163	504	0.589175	249	0.462132	244	-30.5559	-15.5602
AUUACU	1572	241	699	478	1418	0.589158	250	0.46062	288	-29.725	-14.4043
AAACCU	625	98	268	187	553	0.589117	251	0.458983	324	-30.4803	-15.1502
CUUAUU	2316	359	1032	688	2079	0.589086	252	0.468451	133	-29.7878	-14.3058
UAUCAA	1113	187	442	359	988	0.589081	253	0.454659	466	-29.177	-14.1579
CAUUUA	1603	251	688	490	1429	0.589025	254	0.448472	746	-29.6675	-14.1004
AGUUAU	2648	438	1107	828	2373	0.589019	255	0.451663	602	-29.9399	-14.2831
CAUUUU	2269	359	962	668	1989	0.589013	256	0.441005	1212	-29.8317	-14.1568
AAAUCU	1103	170	472	341	983	0.589009	257	0.465175	184	-29.7823	-14.3099
GAAAUU	1719	272	754	521	1547	0.589	258	0.452057	582	-29.7272	-14.0917
UCAAAU	1149	171	505	362	1038	0.588996	259	0.445495	921	-29.2201	-13.731
CUUUAU	2254	338	1028	649	2015	0.58898	260	0.457443	363	-30.078	-14.4147
AUAGUU	2639	429	1144	804	2377	0.588852	261	0.442491	1102	-30.09	-14.3688
UACUUU	2280	360	952	708	2020	0.588751	262	0.448289	754	-30.1574	-14.6239
AAUACC	547	81	241	156	478	0.588728	263	0.48909	7	-30.3037	-15.4548
UCACUU	1320	209	592	379	1180	0.588706	264	0.472259	81	-30.4734	-14.7649
ACAUAU	1144	182	490	345	1017	0.588673	265	0.474144	65	-30.056	-15.1169
AUAAAC	814	130	345	241	716	0.588669	266	0.470603	101	-29.3323	-14.0942
GGAAUA	1597	250	683	489	1422	0.588621	267	0.463667	211	-30.3861	-15.0928
AAUACU	1059	182	433	340	955	0.588606	268	0.456742	384	-29.4575	-14.3657
AAGAAC	624	108	264	191	563	0.588552	269	0.46236	236	-30.2859	-15.3104
CUUUUA	2233	343	1000	665	2008	0.588501	270	0.461853	254	-30.1263	-14.4623
UUCUUA	2135	348	885	668	1901	0.588478	271	0.464085	205	-29.769	-14.1432
AACAUU	1049	158	470	301	929	0.588458	272	0.458944	327	-29.4398	-14.2904
CAAACC	409	64	185	114	363	0.588365	273	0.435465	1621	-30.7108	-15.7758
CAUUAU	1643	269	683	520	1472	0.588364	274	0.458042	347	-29.825	-14.2608
UUUACU	2304	358	996	685	2039	0.588361	275	0.474581	63	-29.7036	-14.1703
ACAUCA	697	108	313	201	622	0.588325	276	0.442612	1092	-29.8391	-14.6841
AAUUAG	1743	268	767	523	1558	0.5882	277	0.452054	583	-29.8481	-14.158
UUACUU	2313	369	985	686	2040	0.588193	278	0.464585	193	-29.8351	-14.2688
UUCUAA	1397	228	591	433	1252	0.588112	279	0.455453	438	-29.5802	-13.9719
AUUAUC	1630	279	684	499	1462	0.58805	280	0.462249	240	-29.3711	-14.045
AAACUU	1082	170	479	332	981	0.588024	281	0.464996	186	-29.3187	-14.0619
AUCUUU	2378	371	1055	703	2129	0.587869	282	0.459239	314	-30.0621	-14.3887
CUUUUC	1973	311	868	596	1775	0.587854	283	0.44006	1264	-30.4839	-14.6812
AAAUAU	1498	247	656	451	1354	0.587844	284	0.445569	917	-28.6405	-13.4446
UUAUUC	2357	372	1051	725	2148	0.58783	285	0.457312	365	-29.5843	-14.0857
AGCUCA	847	128	382	255	765	0.587767	286	0.441105	1206	-31.1811	-15.6176
UCCAAU	866	136	393	248	777	0.587766	287	0.462347	237	-30.3323	-14.7545
AAACAU	784	131	318	247	696	0.587738	288	0.448413	748	-29.4634	-14.3138
UCAUUC	1369	202	628	403	1233	0.587601	289	0.437791	1427	-29.9364	-14.5009
AUCUCA	853	132	381	236	749	0.587553	290	0.464723	188	-30.1476	-14.8458
UACAUU	1643	266	719	493	1478	0.587474	291	0.452444	560	-29.7792	-14.631
UAUACG	1363	225	574	419	1218	0.587426	292	0.45486	460	-30.5305	-15.1908
UUUCUU	3419	547	1512	1029	3088	0.587404	293	0.45673	386	-30.0152	-13.9772
UAUCCG	1328	208	597	385	1190	0.587354	294	0.45267	551	-31.3598	-15.6767
CACAAU	662	113	274	198	585	0.587347	295	0.448717	734	-29.6579	-14.2549
AUUAGA	1610	271	697	491	1459	0.587344	296	0.455728	423	-30.0028	-14.5503
AUUCAA	1108	173	484	340	997	0.587239	297	0.460491	292	-29.1789	-13.673
AUCACU	854	136	382	253	771	0.587237	298	0.439232	1319	-30.1796	-14.821
UAAAGA	1183	189	515	351	1055	0.587136	299	0.441355	1185	-29.1941	-13.8961
GAAGAC	812	137	344	244	725	0.587114	300	0.452143	574	-31.1122	-15.6279
UUCAUU	2351	379	999	723	2101	0.587113	301	0.452413	565	-29.5942	-14.0186
GCUAAC	771	122	356	215	693	0.587088	302	0.44273	1083	-30.9134	-15.8578
AUUCAU	1665	259	718	518	1495	0.587018	303	0.426818	2411	-29.6433	-14.2144
AUCUUA	1478	253	629	468	1350	0.587006	304	0.476609	40	-29.7591	-14.387
UAUUUC	2438	383	1084	733	2200	0.586984	305	0.475346	56	-29.9362	-14.0596
GAGAUA	1438	233	600	427	1260	0.586969	306	0.4762	46	-30.0416	-14.7476
AUAUGA	1636	251	741	476	1468	0.586915	307	0.442429	1107	-30.5164	-15.116
CAUUCA	930	148	405	284	837	0.586913	308	0.433816	1776	-29.8444	-14.5899
GUAAAC	975	146	452	274	872	0.58689	309	0.446745	843	-30.4621	-14.8605
AUGAUA	1586	250	691	482	1423	0.586888	310	0.453001	539	-29.88	-14.7414
CUACAA	610	104	255	189	548	0.586875	311	0.456838	377	-29.8174	-14.7477
CUAUAA	1024	159	445	297	901	0.586866	312	0.441495	1171	-29.786	-14.3228
UUUCCA	1244	193	565	348	1106	0.586862	313	0.444594	967	-30.3931	-14.5264
AUCUAU	1532	245	661	457	1363	0.586861	314	0.476131	47	-30.0344	-14.4248
UUACCU	1142	178	519	325	1022	0.586856	315	0.455499	434	-30.7113	-15.5316
GUAAUU	2586	415	1130	764	2309	0.586803	316	0.453589	517	-30.4425	-14.1869
AAACCC	414	63	183	127	373	0.586746	317	0.43733	1471	-30.915	-15.5728
CAAUAU	1118	186	468	352	1006	0.586626	318	0.450995	638	-29.5592	-14.2353
GUAAUA	1693	275	725	514	1514	0.586605	319	0.456411	402	-29.8516	-14.1961
UUCAUA	1535	258	628	483	1369	0.586557	320	0.460091	297	-29.4684	-14.3114
UAUCUA	1510	243	647	473	1363	0.586507	321	0.447617	795	-29.8737	-14.58
CGAAGA	833	128	368	229	725	0.586503	322	0.46532	182	-30.4967	-15.3409
UACAAC	592	92	254	180	526	0.586447	323	0.448479	745	-30.1142	-14.7575
GACAUA	968	151	426	287	864	0.586436	324	0.477893	31	-30.6835	-15.733
CCAUAU	913	139	417	255	811	0.586419	325	0.454127	490	-30.3787	-15.1112
UCUUUU	3468	555	1505	1035	3095	0.586373	326	0.448034	768	-30.1602	-14.0647
AAUAAA	1050	174	452	316	942	0.58637	327	0.457654	358	-28.1089	-13.1997
ACCAUU	901	151	384	270	805	0.586338	328	0.446091	890	-30.2781	-14.9528
AUGCAC	814	117	381	230	728	0.586318	329	0.440454	1236	-31.1453	-15.8595
UAAUCU	1586	271	664	495	1430	0.586291	330	0.466577	165	-29.9169	-14.2282
UGAUAU	2376	365	1027	710	2102	0.586289	331	0.462636	229	-30.2963	-14.7198
CAUUGU	2182	353	955	662	1970	0.586228	332	0.459406	308	-30.8945	-14.855
UCCUUA	1269	202	576	367	1145	0.586126	333	0.448402	749	-30.7283	-15.1834
CAAUUU	1733	266	792	496	1554	0.586068	334	0.44695	831	-29.5947	-14.0291
AAUUUC	1621	253	706	478	1437	0.586022	335	0.450233	674	-29.4235	-13.9031
CAACCA	361	59	165	103	327	0.58601	336	0.442545	1098	-30.3159	-15.0372
UCUUAU	2179	335	973	667	1975	0.585987	337	0.452051	584	-29.7593	-14.1246
UAUUAG	2689	424	1213	789	2426	0.585957	338	0.45075	651	-30.5727	-14.5556
ACACCA	426	66	193	122	381	0.585904	339	0.469318	120	-30.6543	-15.4124
AACAAU	705	115	310	213	638	0.58579	340	0.415621	3314	-28.9477	-13.6881
UAAAUC	1057	166	467	310	943	0.585758	341	0.454004	498	-29.3493	-13.8881
AAUAGU	1802	293	778	545	1616	0.585696	342	0.435217	1644	-29.9851	-14.3362
CCUUAU	1246	203	562	359	1124	0.58569	343	0.481367	17	-30.6928	-15.2811
AAACCG	666	100	306	191	597	0.585686	344	0.433257	1821	-30.9461	-15.4731
AUGAAU	1627	265	691	511	1467	0.585564	345	0.434312	1726	-29.932	-14.6164
UUAACG	1471	242	640	436	1318	0.585539	346	0.454082	492	-30.3189	-14.7033
CAAACU	612	99	262	191	552	0.585531	347	0.441418	1180	-29.7651	-14.7413
ACUAUU	1552	250	677	455	1382	0.585523	348	0.456588	392	-29.8228	-14.3766
CAAGAU	971	144	428	284	856	0.585493	349	0.469379	117	-30.2675	-15.0126
CAUAAG	1040	174	431	319	924	0.58545	350	0.445066	947	-30.3857	-14.9488
AAAGAU	1199	205	470	365	1040	0.585444	351	0.444774	961	-29.2823	-13.8942
UUGAUU	3340	559	1411	1038	3008	0.585423	352	0.451818	593	-30.1177	-14.2486
AUACUU	1520	249	654	470	1373	0.585408	353	0.47232	79	-30.0936	-15.1184
AAUUGA	1621	266	710	492	1468	0.585337	354	0.470583	102	-29.5844	-14.2917
CGACUA	756	121	344	219	684	0.585332	355	0.446697	848	-31.1492	-15.8396
UCACUA	817	136	341	258	735	0.585327	356	0.418857	3082	-30.2381	-14.7519
UACUCU	1291	219	539	397	1155	0.585322	357	0.469249	121	-30.5459	-15.1517
UAUUCU	2267	358	987	677	2022	0.585175	358	0.447581	797	-29.923	-14.3816
AAUCAA	762	123	322	223	668	0.585126	359	0.446682	851	-28.8609	-13.6937
UAAUCA	1050	163	468	299	930	0.585098	360	0.460607	289	-29.3261	-13.8888
CUAUUU	2259	364	993	660	2017	0.58504	361	0.45989	302	-30.167	-14.2489
UCAUCU	1351	216	611	388	1215	0.585031	362	0.471079	98	-30.6039	-14.6801
AUAGAU	1628	271	675	509	1455	0.585023	363	0.439761	1278	-30.0276	-14.4353
UUCUUC	1965	310	892	573	1775	0.585021	364	0.448691	735	-30.5409	-14.5146
GAUUAA	1733	287	750	501	1538	0.584987	365	0.44396	1000	-29.4251	-14.0861
GAAAAA	747	120	316	241	677	0.584981	366	0.463213	217	-29.1008	-13.6365
AACCAA	410	67	165	130	362	0.584957	367	0.464032	207	-29.2048	-14.576
UCUCAU	1341	208	596	383	1187	0.584872	368	0.45468	464	-30.4319	-14.7584
UCAAUA	1125	183	487	341	1011	0.584806	369	0.471692	91	-29.2929	-13.9895
UCUCAA	851	136	381	245	762	0.584721	370	0.456777	381	-30.1241	-14.9143
AAUCUA	1029	169	452	312	933	0.584712	371	0.468817	129	-29.8765	-14.5081
AAACAC	416	60	187	126	373	0.584707	372	0.427505	2351	-29.6793	-14.5942
GAAUAC	860	140	374	265	779	0.584665	373	0.464347	202	-30.0175	-15.1042
UCUUAC	1275	214	538	380	1132	0.584621	374	0.477312	37	-30.4554	-14.9432
UAACAC	570	89	248	170	507	0.584619	375	0.439532	1301	-29.9894	-14.9471
CAAUGC	848	140	370	258	768	0.584599	376	0.436512	1533	-30.9432	-15.594
AUUUCU	2342	382	1015	702	2099	0.584563	377	0.467545	154	-30.0713	-14.2795
UUAUGA	2356	378	1008	706	2092	0.584552	378	0.46439	198	-30.035	-14.4746
AUAUAG	1789	281	773	535	1589	0.584545	379	0.467255	158	-30.1206	-14.5902
UUACCC	738	117	328	205	650	0.584529	380	0.436762	1507	-31.4308	-16.0172
AGAAAU	1147	188	475	350	1013	0.584507	381	0.431753	1951	-29.5951	-14.1407
AUAGCU	1324	207	598	391	1196	0.584484	382	0.440441	1239	-30.6516	-15.3842
UUUGAU	3401	539	1486	1013	3038	0.584448	383	0.441128	1204	-30.3307	-14.4067
GAUUAU	2433	404	1045	746	2195	0.584403	384	0.459784	304	-29.9041	-14.4616
UUUACA	1592	262	684	480	1426	0.584361	385	0.442562	1097	-29.5643	-14.141
UCCUAU	1237	205	528	371	1104	0.584231	386	0.452913	544	-30.78	-15.1102
CAUUUC	1388	226	616	418	1260	0.584213	387	0.456053	412	-30.3277	-14.8611
ACAAUU	1142	186	501	349	1036	0.584196	388	0.449544	699	-29.3654	-13.8475
AAAAGA	802	138	341	237	716	0.584188	389	0.448984	718	-28.9006	-13.6505
CUCAAU	881	138	397	257	792	0.584179	390	0.461608	265	-30.4995	-14.8253
AGAACU	879	132	405	250	787	0.584177	391	0.461995	248	-30.788	-15.6898
UGAUUU	3413	562	1465	1041	3068	0.584155	392	0.458599	335	-30.3554	-14.3601
AGAAUA	1166	177	537	326	1040	0.58413	393	0.442844	1074	-29.7593	-14.7405
UUUCAU	2434	391	1088	712	2191	0.584124	394	0.454384	481	-29.5177	-14.0026
CGUAGA	1189	181	527	346	1054	0.584122	395	0.422539	2771	-31.5718	-15.9231
UCCAAA	581	91	279	164	534	0.584099	396	0.429447	2184	-30.3112	-14.7532
UCAUAC	858	138	377	257	772	0.58407	397	0.474138	66	-30.3861	-15.4272
CAGAAC	519	86	230	153	469	0.584041	398	0.430524	2072	-30.8569	-16.2505
CCUUUU	1847	301	831	542	1674	0.583982	399	0.464636	192	-31.0617	-15.2865
UAAAAC	740	118	315	222	655	0.583954	400	0.444193	987	-29.1757	-13.9136
GUCAAA	1079	163	485	329	977	0.583952	401	0.459295	311	-30.1441	-14.374
AUUUUG	3730	594	1612	1119	3325	0.583926	402	0.441776	1149	-30.57	-14.2938
AAAUGC	1052	171	447	316	934	0.583788	403	0.430197	2106	-30.1114	-15.0045
AUUCUC	1373	221	605	397	1223	0.583786	404	0.457166	367	-30.4078	-14.7022
GUUUUA	3966	661	1681	1204	3546	0.583782	405	0.454178	489	-30.5335	-14.2756
UAACCA	585	95	238	174	507	0.583777	406	0.42996	2128	-29.8965	-14.8749
CACUUG	1283	202	574	374	1150	0.583732	407	0.454955	457	-31.6073	-15.7606
AUACAG	969	166	417	292	875	0.583687	408	0.464653	191	-30.2567	-14.9209
UAAUUG	2654	451	1108	798	2357	0.583671	409	0.456456	398	-30.1247	-14.3271
ACAUUU	1583	253	696	459	1408	0.583644	410	0.452062	580	-30.0508	-14.3933
CUGAUA	1209	192	517	346	1055	0.583591	411	0.458662	334	-30.6481	-15.0589
UGCACA	837	127	377	240	744	0.583585	412	0.445322	927	-30.7917	-15.4889
CUACUU	1186	193	519	355	1067	0.583541	413	0.44415	989	-30.52	-14.8844
UUACAA	1030	171	437	323	931	0.583523	414	0.428302	2280	-29.3276	-13.9414
ACAGAA	632	99	278	181	558	0.583522	415	0.43415	1742	-29.6965	-14.7527
UUACGA	1287	219	536	383	1138	0.583437	416	0.475582	54	-29.8522	-14.5799
CCUACA	517	88	219	158	465	0.583397	417	0.458547	337	-30.8321	-15.6722
GCUUAU	2099	335	909	628	1872	0.583329	418	0.447727	788	-30.7971	-15.2535
UUAACA	1043	177	455	306	938	0.583301	419	0.435581	1605	-29.3288	-13.9839
AAUCCG	944	144	427	279	850	0.583298	420	0.443903	1007	-31.1575	-15.6136
AACUCA	623	86	282	172	540	0.583296	421	0.448959	724	-29.2973	-14.3368
CAUUCU	1401	214	644	398	1256	0.583293	422	0.443841	1012	-30.1994	-14.7286
AAUGAU	1638	262	707	490	1459	0.583262	423	0.452789	548	-29.6401	-14.3531
CGAAUC	826	136	370	250	756	0.583208	424	0.451315	621	-30.9028	-15.5635
UAACUU	1517	247	659	446	1352	0.583199	425	0.465949	174	-29.8308	-14.2323
UCAACC	558	95	247	162	504	0.583192	426	0.435541	1613	-30.8172	-15.4032
AUAGUC	1368	214	617	390	1221	0.583172	427	0.475015	60	-30.86	-15.1438
AACUGU	1404	221	620	403	1244	0.583165	428	0.466162	171	-30.9326	-15.017
CAACUU	923	153	409	273	835	0.583105	429	0.456826	378	-30.132	-14.4613
CAUUAA	1074	178	470	316	964	0.583101	430	0.440501	1234	-29.2329	-13.8935
ACAAAG	729	118	335	209	662	0.583096	431	0.448219	758	-30.0997	-14.6176
AUAUGC	1399	230	613	408	1251	0.583083	432	0.455637	428	-31.2219	-15.9598
ACGAAA	642	104	275	186	565	0.583072	433	0.466545	167	-29.4424	-14.4806
AAUAGC	936	151	411	282	844	0.583022	434	0.429235	2202	-30.4543	-15.2169
CCAGAA	559	82	265	153	500	0.582884	435	0.463592	212	-30.393	-15.72
GAUACA	929	156	391	287	834	0.582838	436	0.47689	39	-30.1393	-15.0568
AAUUCG	1547	244	702	459	1405	0.582827	437	0.447114	821	-30.3591	-14.7246
AUUGAU	2316	373	994	700	2067	0.58278	438	0.457541	361	-29.802	-14.3909
UACUUA	1503	240	704	420	1364	0.58271	439	0.46258	230	-30.0142	-14.7123
AAAUCG	1013	156	456	291	903	0.582687	440	0.442741	1082	-29.9659	-14.5796
UAACUG	1286	218	543	387	1148	0.582666	441	0.457966	350	-30.4127	-15.129
GCACUA	857	134	383	245	762	0.582617	442	0.463032	220	-30.7785	-15.5566
UGAAUU	2276	389	931	716	2036	0.582515	443	0.458694	333	-29.9763	-14.3979
UAUCAC	875	152	361	269	782	0.582386	444	0.441148	1202	-29.8982	-14.7746
GUUUUU	5870	974	2615	1723	5312	0.582333	445	0.446263	880	-30.541	-14.112
CAUACU	920	149	420	254	823	0.582291	446	0.450858	645	-30.6502	-15.8943
AUAAUG	1828	315	797	543	1655	0.582288	447	0.468334	137	-29.9148	-14.3283
AAAGAA	793	139	341	241	721	0.582238	448	0.46573	175	-29.0169	-13.9018
CUCUAU	1241	208	543	381	1132	0.582193	449	0.471961	85	-30.916	-15.1262
UAAUAA	1393	219	629	415	1263	0.582181	450	0.455113	453	-28.6632	-13.2767
AGUAAA	1204	185	547	340	1072	0.582172	451	0.426776	2415	-29.6103	-14.0082
AUUAAG	1820	289	839	494	1622	0.582138	452	0.449349	704	-29.4952	-13.9963
AGACUU	1397	222	600	411	1233	0.582133	453	0.436664	1521	-30.6	-15.2838
CACUUU	1317	209	607	376	1192	0.582084	454	0.457388	364	-30.2365	-14.738
GUUAAU	2608	414	1120	787	2321	0.582081	455	0.448817	731	-30.1088	-14.1394
CAUCUU	1328	214	610	379	1203	0.582004	456	0.449191	710	-30.4682	-14.9342
AGCUAA	921	146	413	267	826	0.581904	457	0.431713	1956	-30.0725	-15.0618
UUAACC	850	138	364	248	750	0.581889	458	0.457988	348	-30.1005	-14.8535
UAGUUA	2561	436	1055	810	2301	0.581834	459	0.437487	1457	-30.2444	-14.4709
GGAAAU	1623	266	697	477	1440	0.581829	460	0.448509	742	-30.3892	-14.7875
UUCCCA	802	120	383	221	724	0.581806	461	0.442963	1064	-31.0189	-15.1911
CUACAU	887	137	399	253	789	0.581784	462	0.431871	1939	-30.3604	-14.9485
AAUUAC	1068	168	475	302	945	0.581769	463	0.458549	336	-29.6973	-14.3839
AAUGCU	1400	226	635	408	1269	0.581752	464	0.443929	1004	-30.5355	-15.3485
AGUAUA	1831	297	798	528	1623	0.581718	465	0.455521	432	-30.7421	-14.833
AGUUUU	4061	680	1795	1176	3651	0.581632	466	0.456097	410	-30.2621	-14.2132
CCAUAG	787	129	327	246	702	0.581625	467	0.446651	855	-31.6516	-16.15
ACCAUA	577	98	236	177	511	0.581569	468	0.456134	408	-30.4663	-15.2226
CUUUAC	1282	201	572	364	1137	0.581549	469	0.443698	1018	-30.3471	-14.9772
GCUCAC	827	121	385	233	739	0.581507	470	0.43525	1641	-32.0359	-16.4974
UUGCAC	1233	195	554	356	1105	0.581481	471	0.448023	769	-31.0047	-15.4231
UUCAAU	1657	284	725	501	1510	0.581438	472	0.470029	108	-29.3852	-13.7296
AAAACC	418	61	178	124	363	0.581415	473	0.423833	2653	-29.841	-14.9239
AACGAC	573	91	267	172	530	0.581395	474	0.421731	2846	-30.4642	-15.5145
AAAACU	766	123	346	218	687	0.581375	475	0.428433	2270	-29.2604	-13.9118
UAGAUA	1667	285	737	505	1527	0.581373	476	0.463851	209	-30.2529	-14.6405
GCUAUA	1369	233	591	406	1230	0.581332	477	0.443013	1057	-30.7838	-15.298
UCUUAA	1462	258	615	432	1305	0.581301	478	0.472275	80	-29.5442	-14.0237
GAAUUA	1713	290	740	528	1558	0.581252	479	0.451373	618	-29.7064	-14.3326
UUCCAU	1284	198	603	357	1158	0.581238	480	0.458508	338	-30.3856	-14.6909
AUCGCA	932	151	406	264	821	0.581223	481	0.43935	1311	-30.8227	-15.4144
UCUUUA	2301	377	1012	659	2048	0.581082	482	0.442317	1118	-30.0115	-14.099
UUGUAA	2455	433	1017	751	2201	0.581074	483	0.446338	873	-30.1427	-14.0585
AAGAAA	791	123	358	233	714	0.581041	484	0.448965	721	-29.158	-13.8072
AUGCUU	1992	346	859	589	1794	0.58101	485	0.446914	833	-31.1372	-15.6808
AUAUGU	2616	432	1168	783	2383	0.580991	486	0.467585	152	-30.5547	-14.6623
CCAAAC	351	53	162	101	316	0.580986	487	0.451676	601	-30.7292	-15.5339
UUACUG	1969	325	848	564	1737	0.580906	488	0.451763	599	-30.5392	-14.9466
CUCUAA	868	146	384	250	780	0.580892	489	0.452128	576	-30.2523	-14.7788
CUCAAC	546	90	255	151	496	0.580868	490	0.455488	435	-30.6529	-15.1874
CUUACC	721	120	339	207	666	0.580844	491	0.443067	1053	-31.4403	-16.0295
CUUAAA	1004	168	426	295	889	0.580836	492	0.4647	189	-29.3683	-14.2286
GUAUCA	1420	237	610	427	1274	0.580827	493	0.447667	792	-30.4856	-15.0582
UAACUA	965	159	429	270	858	0.580786	494	0.45104	635	-29.6193	-14.4244
UUGAAA	1560	274	647	473	1394	0.580786	495	0.432782	1860	-29.7268	-14.0968
UAUAUC	1618	272	694	485	1451	0.5807	496	0.452425	562	-29.7206	-14.5704
GUAUAA	1800	305	755	536	1596	0.580667	497	0.45541	440	-30.1257	-14.3869
AUUAUG	2619	432	1101	797	2330	0.580598	498	0.463135	219	-29.9701	-14.3376
ACAGCG	833	130	380	235	745	0.580597	499	0.429842	2139	-31.8117	-16.3974
CGAGAA	796	123	355	226	704	0.580562	500	0.455456	437	-30.6913	-15.4039
ACUAAA	706	109	320	205	634	0.58051	501	0.451236	626	-29.4172	-14.0718
UAUCUU	2298	379	1004	687	2070	0.58045	502	0.437806	1426	-30.0649	-14.6089
CGAUAU	1324	221	561	402	1184	0.580403	503	0.451831	592	-30.3819	-14.8932
UCUAUU	2215	361	988	647	1996	0.580379	504	0.457563	360	-30.2042	-14.1319
UUGAAU	2309	379	1029	695	2103	0.580355	505	0.461273	270	-29.8991	-14.3075
CCUGAA	719	109	338	210	657	0.580334	506	0.452281	571	-31.2526	-16.2971
AACUUU	1584	270	684	471	1425	0.580315	507	0.454308	485	-29.8696	-14.2713
AAAGAC	667	107	296	188	591	0.580311	508	0.448684	736	-29.864	-14.5401
CAAUGA	901	161	364	286	811	0.580244	509	0.446306	875	-30.4855	-15.1704
AUAUUC	1658	252	754	470	1476	0.580194	510	0.453542	520	-29.5899	-14.2557
AGACAU	943	147	410	267	824	0.580169	511	0.451	637	-31.2718	-15.3817
UUUCGA	1989	332	877	588	1797	0.580156	512	0.441412	1181	-30.3579	-14.8166
UUCACU	1305	218	575	369	1162	0.580081	513	0.436466	1538	-30.5545	-14.7767
ACUAUC	831	134	366	237	737	0.580069	514	0.439623	1292	-30.4006	-15.084
CUAUCA	795	131	336	237	704	0.580048	515	0.448264	755	-29.9945	-14.856
AAAUUG	1927	329	826	577	1732	0.579989	516	0.42547	2513	-29.7813	-13.9456
UACCCA	503	71	245	132	448	0.579969	517	0.45388	503	-31.0592	-16.1057
GUAACU	1329	204	599	355	1158	0.579921	518	0.455777	421	-30.7243	-14.994
UAUUGA	2352	406	999	719	2124	0.579909	519	0.471817	88	-30.0574	-14.4698
UGAAAC	867	141	391	254	786	0.579908	520	0.420166	2979	-30.1997	-14.8692
CUUAUG	1968	310	897	574	1781	0.579903	521	0.454492	476	-31.0139	-15.3179
AACUAU	1010	159	443	279	881	0.579895	522	0.460825	279	-29.4731	-14.3053
GAUUUC	1967	322	863	588	1773	0.57987	523	0.455688	425	-30.5067	-15.0103
AAAUCA	801	127	351	229	707	0.579851	524	0.414272	3394	-29.1688	-13.9318
GAAUUU	2475	426	1039	763	2228	0.579844	525	0.46333	214	-29.7827	-14.2977
CUAAUU	1464	239	623	453	1315	0.579833	526	0.470401	105	-29.682	-14.2116
AAGAUU	1760	293	731	534	1558	0.57982	527	0.460039	299	-29.5163	-14.0042
AGUUAA	1777	297	739	547	1583	0.579806	528	0.445172	934	-29.6476	-14.111
UUUACC	1205	202	530	349	1081	0.579794	529	0.44682	837	-30.4819	-15.2458
AAAGUU	1874	310	792	584	1686	0.579784	530	0.461734	259	-29.7104	-13.9051
UUCCUA	1168	175	529	326	1030	0.579772	531	0.451557	607	-30.7387	-15.1279
CACAGA	578	95	261	159	515	0.579684	532	0.43994	1269	-30.2592	-15.5269
AGAGAU	1473	239	635	419	1293	0.579671	533	0.452359	568	-29.9437	-14.8398
AAUUUG	2582	435	1128	775	2338	0.579664	534	0.443737	1016	-30.2277	-14.2372
GACUUU	2069	351	953	590	1894	0.579662	535	0.427524	2347	-30.8839	-15.1399
GUUAUU	3868	655	1678	1155	3488	0.579648	536	0.437017	1489	-30.1362	-14.1831
GGAUAU	2241	367	1004	625	1996	0.579606	537	0.455229	446	-31.0303	-15.5423
UUUCCU	1865	298	835	537	1670	0.579587	538	0.444264	983	-31.0114	-15.0039
UAAAUG	1933	342	849	575	1766	0.57957	539	0.438326	1392	-29.9011	-14.2609
GUUUAA	2757	470	1165	805	2440	0.579532	540	0.449568	697	-29.8666	-13.9272
AAAUGA	1177	180	536	331	1047	0.579464	541	0.456947	374	-29.2648	-14.1517
GGAAUU	2335	381	1020	676	2077	0.57943	542	0.451796	596	-30.5699	-14.8807
AUUCGA	1322	214	577	391	1182	0.579384	543	0.460925	275	-29.9655	-14.5637
CUUGCA	1114	177	507	320	1004	0.579336	544	0.447796	781	-31.3939	-15.9201
AAAAAA	523	86	226	152	464	0.579277	545	0.454573	471	-28.2292	-12.9744
UUCUAU	2115	361	892	655	1908	0.579242	546	0.434855	1679	-30.1153	-14.1009
GAAAAC	658	98	302	183	583	0.579225	547	0.447322	808	-29.6292	-14.464
AAUUCC	922	166	399	273	838	0.579188	548	0.45512	452	-30.157	-14.6377
CGUUUU	3154	519	1425	883	2827	0.579186	549	0.445868	902	-31.0293	-14.744
UAAAAG	1238	224	512	378	1114	0.579117	550	0.441254	1195	-29.4845	-13.9302
ACUCAA	649	111	277	174	562	0.579011	551	0.444499	971	-29.8983	-14.5578
UACAAU	1064	191	445	331	967	0.578978	552	0.434142	1744	-29.3998	-14.1858
UUACAU	1657	283	742	476	1501	0.578966	553	0.452123	577	-29.8878	-14.5807
UUUUUG	5502	910	2468	1584	4962	0.578915	554	0.446157	888	-30.7928	-14.3176
UUUCUC	2048	346	939	585	1870	0.578911	555	0.429836	2142	-30.5808	-14.6345
CCUAAU	824	141	367	243	751	0.578888	556	0.476268	45	-30.8561	-15.3943
UAUGAA	1656	273	704	492	1469	0.578888	557	0.438284	1394	-29.9922	-14.553
UCCCAU	782	121	352	227	700	0.578849	558	0.459273	313	-30.9807	-15.4866
AAGAGA	998	162	440	281	883	0.578814	559	0.445903	899	-29.6047	-14.4322
UCAUUG	2134	350	935	630	1915	0.578759	560	0.438111	1399	-30.8201	-14.9442
UAGCUU	1987	327	904	567	1798	0.578731	561	0.452152	573	-30.816	-15.1402
AAUCCU	892	150	395	263	808	0.578702	562	0.450453	662	-30.6968	-15.0513
GAAAUA	1205	198	522	347	1067	0.578683	563	0.442421	1108	-29.5659	-14.1235
CGAGUA	1190	199	534	336	1069	0.57868	564	0.448003	770	-31.138	-15.4583
UUCUCA	1353	232	599	391	1222	0.578617	565	0.435849	1580	-30.3578	-14.4765
CAACCC	346	53	165	94	312	0.578604	566	0.417669	3171	-31.4728	-16.1777
CCUAUA	795	122	365	217	704	0.578601	567	0.461895	252	-30.3889	-15.1625
UUACCA	825	130	384	235	749	0.578576	568	0.433288	1817	-30.0606	-14.9958
AAUAGG	1766	286	795	502	1583	0.578572	569	0.459187	318	-30.383	-14.8214
AUAAGG	1703	292	732	510	1534	0.578564	570	0.441739	1152	-30.3588	-14.7787
AUUCUA	1468	251	625	438	1314	0.578559	571	0.456122	409	-29.7572	-14.2716
GAGAUU	2175	372	925	640	1937	0.578555	572	0.460493	291	-30.3261	-14.9174
UACAUC	953	162	424	271	857	0.578554	573	0.464453	196	-30.463	-15.2474
GCACUU	1256	207	568	367	1142	0.578477	574	0.448857	729	-31.2998	-15.7055
AUUUAG	2714	456	1156	778	2390	0.57847	575	0.447936	775	-30.2222	-14.4582
UUAAGG	2606	432	1127	752	2311	0.578398	576	0.449182	713	-30.335	-14.6574
AUCAGA	955	160	432	277	869	0.578372	577	0.453713	510	-30.024	-14.8432
AGUUUC	2135	344	958	605	1907	0.578361	578	0.440907	1215	-30.6296	-14.6549
ACUUAC	886	137	409	253	799	0.578287	579	0.449389	702	-30.2658	-15.1032
UCCAUU	1300	217	576	385	1178	0.578257	580	0.443965	999	-30.8157	-14.8617
ACAUUC	1026	166	461	298	925	0.578236	581	0.458423	343	-30.3429	-14.9671
AUAGCC	794	136	340	233	709	0.578235	582	0.435454	1624	-31.5409	-16.1344
GAAACA	653	117	274	204	595	0.578199	583	0.430025	2118	-30.0241	-14.6123
AUGAGA	1428	235	633	407	1275	0.578191	584	0.439223	1320	-30.5054	-15.2003
ACAUUG	1557	247	702	432	1381	0.578172	585	0.445577	916	-30.7005	-15.1542
AGCUAU	1310	213	560	375	1148	0.578164	586	0.453758	507	-30.5881	-15.2678
CCGAGA	743	108	368	194	670	0.578148	587	0.430578	2065	-31.6636	-16.2277
ACUCUG	1308	210	597	371	1178	0.578116	588	0.468464	132	-31.6631	-16.0879
AACUAC	579	97	252	173	522	0.578105	589	0.418702	3093	-30.3033	-15.2007
ACAGUA	999	172	411	316	899	0.578051	590	0.45089	643	-30.265	-14.8901
UCGUAA	1449	227	652	427	1306	0.578003	591	0.450808	649	-30.4351	-14.5436
UAAGUA	1728	300	730	505	1535	0.577987	592	0.440138	1258	-30.0543	-14.2584
ACGUAA	946	156	427	276	859	0.577963	593	0.427456	2356	-30.1867	-14.9477
GUAAAA	1184	208	493	357	1058	0.577958	594	0.445993	897	-29.5961	-13.7873
CGAUAA	927	158	396	276	830	0.577907	595	0.44767	791	-29.9213	-14.6558
CUAACU	797	130	361	228	719	0.577854	596	0.447474	804	-30.431	-15.2249
UACUAU	1426	252	624	417	1293	0.577827	597	0.456139	407	-29.7635	-14.5022
GCCAUA	844	134	383	235	752	0.57778	598	0.436515	1532	-30.9347	-15.6498
GAUAAC	911	147	406	262	815	0.577755	599	0.436665	1519	-30.2335	-14.908
GUUUUC	3292	536	1459	934	2929	0.577716	600	0.438747	1350	-30.9405	-14.7938
CCAGCC	526	82	238	149	469	0.577693	601	0.421817	2834	-32.6402	-16.951
UAUUCC	1308	206	610	368	1184	0.577683	602	0.465357	181	-30.5651	-14.7903
AUUCCU	1267	206	581	352	1139	0.577679	603	0.449188	712	-30.7578	-15.0818
AUUCAC	937	147	431	253	831	0.577657	604	0.434245	1735	-29.9838	-14.6452
CGUAAA	1025	182	432	308	922	0.577615	605	0.441186	1200	-30.2362	-14.6741
UGAGUU	3249	538	1425	930	2893	0.577581	606	0.452381	566	-31.225	-15.2293
CACAUG	891	144	398	250	792	0.577411	607	0.432082	1920	-31.6532	-16.0701
GAGAAC	832	133	366	240	739	0.577408	608	0.451757	600	-31.1368	-16.168
UUCUAC	1261	205	568	354	1127	0.577376	609	0.452089	579	-30.5967	-14.8647
UCAGAU	1348	211	616	380	1207	0.577362	610	0.452828	546	-30.474	-14.8636
CUUUGA	1915	309	870	540	1719	0.577351	611	0.465677	177	-30.6136	-15.1446
UGCCAU	1141	182	513	325	1020	0.577336	612	0.429094	2211	-31.6816	-16.1744
AAAACG	742	108	351	198	657	0.577281	613	0.436737	1509	-29.6703	-14.3145
CCAACC	342	56	149	105	310	0.577274	614	0.460669	285	-31.6829	-16.2643
UUUUCC	1917	314	872	525	1711	0.577266	615	0.430929	2035	-30.8153	-14.6336
CGCACU	854	140	388	246	774	0.577198	616	0.446417	870	-31.8361	-16.1717
AGAUUA	1729	292	728	513	1533	0.577196	617	0.452893	545	-29.586	-14.2437
UAUCUG	2012	323	890	567	1780	0.57718	618	0.448939	726	-30.9759	-15.4662
CAGUUU	2302	384	1032	629	2045	0.577179	619	0.436293	1546	-30.5976	-14.6721
GUAAAU	1757	300	773	505	1578	0.577176	620	0.428664	2251	-29.9335	-14.0719
UUAGAA	1612	280	660	496	1436	0.577155	621	0.43532	1634	-30.3809	-14.8465
AUAGGA	1571	244	715	438	1397	0.577153	622	0.455301	444	-30.8447	-15.2749
UUUAGA	2496	440	1076	744	2260	0.577134	623	0.458469	342	-30.5774	-14.7005
UGAUUA	2248	391	945	680	2016	0.577126	624	0.455694	424	-30.1444	-14.4969
AACUUC	917	148	413	261	822	0.577105	625	0.45086	644	-30.2157	-14.7216
CCGAUU	1130	172	531	300	1003	0.577064	626	0.450669	657	-31.2002	-15.7557
ACCUAA	607	90	287	166	543	0.57706	627	0.437479	1458	-30.1781	-15.1077
GACCCA	453	74	207	126	407	0.57704	628	0.459024	320	-31.792	-16.483
ACGUUU	2220	370	989	637	1996	0.576985	629	0.444926	954	-30.9867	-14.9175
UUAACU	1521	269	640	451	1360	0.576983	630	0.476075	48	-29.5337	-14.1552
AGACUA	831	134	381	226	741	0.576981	631	0.463311	215	-30.4454	-15.2037
GAAUCC	824	132	371	234	737	0.57698	632	0.441314	1192	-31.4605	-15.5805
AAACUG	1039	172	459	284	915	0.576931	633	0.450706	655	-30.6191	-14.9013
ACCUUA	859	144	389	241	774	0.576917	634	0.448786	732	-30.5214	-15.7878
AAGCAA	640	108	285	184	577	0.576882	635	0.445315	928	-29.6667	-14.7745
GACAAU	897	148	404	263	815	0.576876	636	0.474935	61	-30.5012	-14.8708
GUAUUA	2624	421	1183	735	2339	0.576872	637	0.444561	969	-30.3796	-14.473
AAUUGU	2643	453	1122	780	2355	0.576866	638	0.431926	1934	-30.2171	-14.1236
CCCAAU	555	91	258	153	502	0.576816	639	0.415693	3310	-31.2825	-15.6946
GCACAC	590	90	288	150	528	0.576737	640	0.445111	944	-31.0739	-16.0568
AUACUG	1348	237	576	391	1204	0.576731	641	0.436665	1520	-30.8663	-15.4775
CAAACA	413	74	158	131	363	0.576703	642	0.476456	44	-30.0005	-14.6543
CUCUCA	811	127	369	224	720	0.576622	643	0.455379	441	-31.1471	-15.437
AGAUAG	1529	261	642	442	1345	0.576613	644	0.445451	923	-30.8364	-15.0361
CCGAAU	765	126	351	213	690	0.576601	645	0.47531	57	-31.1443	-15.8402
UUAGCC	1111	179	513	313	1005	0.57658	646	0.454029	496	-31.3604	-15.7989
GAUAAG	1555	269	659	456	1384	0.576555	647	0.454201	488	-30.317	-14.7225
AAUAGA	1118	182	512	319	1013	0.576421	648	0.436117	1560	-29.9235	-14.2386
AUUUCG	2306	378	1040	659	2077	0.57642	649	0.447739	787	-30.4632	-14.7466
AUUACG	1461	237	658	408	1303	0.576386	650	0.460995	273	-30.3473	-15.0203
ACAAUC	637	106	303	173	582	0.576375	651	0.445787	906	-29.8479	-14.6405
CAAAUA	812	125	361	240	726	0.576367	652	0.446088	891	-29.0373	-13.8824
UUUUGA	3437	594	1454	1024	3072	0.576364	653	0.440603	1229	-30.2226	-14.3886
AUUUCC	1282	205	582	373	1160	0.576357	654	0.453919	500	-30.4464	-14.7178
CGUAAU	1319	218	585	382	1185	0.576357	655	0.459579	306	-30.6354	-14.6389
GAAACC	551	93	244	169	506	0.576342	656	0.451959	586	-31.1477	-15.6315
AGAAAA	783	133	349	223	705	0.576324	657	0.433556	1797	-29.2873	-13.9616
UAGUUU	3913	672	1713	1117	3502	0.576281	658	0.442821	1076	-30.6289	-14.295
CAUAGG	1440	238	617	435	1290	0.576268	659	0.437591	1449	-31.4434	-15.8573
CAAAUC	635	100	278	186	564	0.576193	660	0.445766	907	-30.1503	-15.0715
CAUUGC	1276	204	591	357	1152	0.576187	661	0.438548	1368	-31.21	-15.7102
ACACUU	946	154	429	268	851	0.576184	662	0.463222	216	-30.0688	-14.8226
GCUCAU	1299	210	594	380	1184	0.576153	663	0.426265	2456	-31.4447	-15.8922
UAACGA	892	144	406	247	797	0.576153	664	0.435985	1568	-29.8599	-14.5064
CUUAAC	825	150	340	236	726	0.576143	665	0.475348	55	-30.1021	-14.9789
AACAGU	1062	195	436	338	969	0.576139	666	0.432651	1869	-30.2992	-14.7667
AAAUCC	626	108	263	187	558	0.576104	667	0.442856	1072	-30.3369	-14.8679
AACGAA	618	103	267	179	549	0.576071	668	0.415782	3299	-29.6545	-14.4929
CAGAAU	974	165	425	284	874	0.576036	669	0.454948	458	-29.6335	-14.7243
UCCAUA	856	142	355	258	755	0.576018	670	0.443854	1010	-30.3973	-15.0448
UUAAGU	2609	451	1136	767	2354	0.575982	671	0.449298	707	-30.2022	-14.1214
CUCUUA	1182	200	540	336	1076	0.575975	672	0.450802	650	-30.5989	-14.9334
ACAACA	416	63	199	109	371	0.57594	673	0.409822	3643	-29.72	-14.4094
UUACGC	1199	206	510	366	1082	0.575923	674	0.45792	353	-30.9135	-15.5462
AGAGUU	2329	394	1008	672	2074	0.575904	675	0.450437	663	-30.6873	-14.9376
CUAUUC	1325	224	581	372	1177	0.575878	676	0.431028	2029	-30.3691	-14.7553
AACUCU	910	172	362	289	823	0.575876	677	0.442095	1133	-30.6399	-15.1866
CGUAAC	854	134	396	233	763	0.575855	678	0.422899	2735	-30.9839	-15.6938
CGCUAU	1202	193	570	327	1090	0.575841	679	0.468209	143	-31.2335	-15.702
AUUGGA	2146	355	945	609	1909	0.575824	680	0.447841	779	-30.6882	-15.1538
CCAAUC	555	88	253	156	497	0.575778	681	0.456662	388	-31.1846	-15.6989
AGGAUU	2323	401	971	691	2063	0.575777	682	0.447921	776	-30.619	-15.0907
CUUCAU	1283	226	556	390	1172	0.575735	683	0.465556	180	-30.4302	-15.1623
CAGAGA	872	147	369	247	763	0.575645	684	0.459016	321	-30.5829	-15.4765
CGUCAA	919	152	405	274	831	0.575606	685	0.438771	1347	-30.7574	-15.3587
CCGCAA	540	104	209	166	479	0.575574	686	0.4739	67	-31.5111	-16.1895
ACACCG	597	98	267	172	537	0.575544	687	0.441599	1163	-31.9981	-16.6142
UGUAAC	1283	208	579	339	1126	0.57552	688	0.436579	1526	-30.8274	-14.8463
ACACAC	388	68	173	112	353	0.575462	689	0.516289	1	-30.5925	-15.2413
CCAGUA	805	134	372	219	725	0.575448	690	0.43222	1903	-31.3851	-15.9922
CCUAUU	1239	204	536	364	1104	0.575412	691	0.455638	427	-30.8399	-15.1803
CAGAUA	946	162	412	276	850	0.575392	692	0.435932	1575	-29.968	-15.0343
GACAUU	1415	223	637	394	1254	0.575371	693	0.448965	722	-30.8141	-15.0384
CUUAGA	1233	214	510	367	1091	0.575361	694	0.431491	1983	-30.9738	-15.5607
AUUCUG	2082	337	926	595	1858	0.57536	695	0.447299	811	-30.8779	-15.1386
AUAAGU	1825	311	773	533	1617	0.575355	696	0.443493	1030	-29.8237	-14.0352
CAUCCU	791	114	385	208	707	0.575309	697	0.4293	2196	-31.7592	-16.3753
AUCUAC	832	138	377	239	754	0.57527	698	0.441998	1139	-30.6836	-15.0295
AUUGUU	3840	656	1668	1116	3440	0.575221	699	0.452964	540	-30.3918	-14.2328
GCUUUA	2105	366	926	612	1904	0.575212	700	0.456983	372	-30.7491	-15.2906
AUUAGG	2493	412	1126	725	2263	0.57521	701	0.43155	1975	-30.8181	-15.0195
GAAAUC	941	160	399	282	841	0.575089	702	0.438484	1374	-30.2807	-14.9083
UUUCAG	2240	375	1001	624	2000	0.575084	703	0.433489	1800	-30.6244	-14.809
GCUUUU	3015	513	1324	894	2731	0.575039	704	0.4328	1857	-31.2227	-15.315
GAGACC	683	112	296	197	605	0.575036	705	0.439475	1307	-31.9724	-16.5881
CGUUUA	2200	390	922	648	1960	0.575029	706	0.459226	316	-30.6391	-14.7848
AAUGAC	900	159	443	257	859	0.575025	707	0.435117	1657	-30.1567	-15.0866
UCUUUC	2083	337	985	563	1885	0.574999	708	0.449642	693	-30.6789	-14.7318
UACAAG	950	169	411	284	864	0.574979	709	0.440382	1243	-30.2066	-14.9163
CUAAAA	689	114	307	196	617	0.574978	710	0.445596	913	-29.3932	-14.0876
AGCCAA	542	89	247	156	492	0.574972	711	0.45579	420	-31.2933	-15.6572
CGAAAA	619	100	272	176	548	0.574959	712	0.421193	2896	-29.569	-14.4931
UUAUUG	3830	682	1610	1159	3451	0.574947	713	0.464562	194	-30.3421	-14.3095
AGCGCA	815	134	357	242	733	0.574929	714	0.448844	730	-31.462	-16.0879
ACUAUA	1022	162	487	282	931	0.574882	715	0.468719	130	-29.6315	-14.3442
AACGUU	1515	264	680	434	1378	0.574819	716	0.442404	1110	-30.3143	-14.736
UUAUAG	2521	417	1120	725	2262	0.574811	717	0.452282	570	-30.4873	-14.4193
AGACCA	557	86	242	153	481	0.574733	718	0.446704	847	-31.0656	-15.9306
GUCAUU	2159	364	942	613	1919	0.574731	719	0.426939	2398	-30.8795	-14.7744
GUUAUA	2610	444	1111	781	2336	0.574718	720	0.434586	1701	-30.1902	-14.4895
UUCCUU	1850	293	857	502	1652	0.574678	721	0.454446	478	-30.9024	-14.8575
UCUAAU	1462	257	645	434	1336	0.574568	722	0.450489	660	-29.7868	-14.038
CGAUUU	2020	331	897	566	1794	0.574559	723	0.459228	315	-30.4079	-14.9045
AUAGAC	884	132	409	236	777	0.574414	724	0.439327	1313	-30.5478	-15.1145
UACUGC	1112	183	485	300	968	0.574412	725	0.461617	263	-31.5058	-15.8454
AACCUA	582	99	242	168	509	0.574404	726	0.449143	716	-30.1531	-15.1716
CCCGUA	811	119	388	215	722	0.574391	727	0.432667	1868	-32.1761	-16.638
CACAGC	564	87	252	153	492	0.57437	728	0.445616	911	-31.4918	-16.1418
CCCAAA	334	49	154	87	290	0.574352	729	0.404056	3848	-30.4798	-15.4003
UAUGAU	2363	415	1005	682	2102	0.574252	730	0.450165	675	-30.2473	-14.7088
GAGAAU	1451	244	638	425	1307	0.574232	731	0.418478	3115	-30.207	-14.9398
UUUUCG	3359	560	1503	952	3015	0.57423	732	0.449548	698	-30.7642	-14.7569
ACUACU	796	142	331	240	713	0.5742	733	0.43088	2040	-30.2836	-15.0415
UUACUA	1462	244	657	440	1341	0.5742	734	0.471163	96	-29.7896	-14.4217
UGUAAU	2496	450	1032	753	2235	0.574159	735	0.44089	1217	-30.3569	-14.1405
CGUUCA	1255	210	570	352	1132	0.57413	736	0.442526	1099	-31.2065	-15.4213
CUGAAA	833	143	349	247	739	0.574127	737	0.430174	2108	-30.2567	-14.9213
GACUGA	1178	185	547	314	1046	0.574085	738	0.42405	2636	-31.1351	-15.9111
ACAGAC	569	90	269	153	512	0.574083	739	0.453905	502	-31.1257	-15.8401
ACUUAG	1389	221	649	372	1242	0.57407	740	0.449937	682	-31.034	-15.4234
UUAUCC	1341	240	583	390	1213	0.574037	741	0.443351	1038	-30.5139	-14.9056
UAUGCU	1893	323	832	547	1702	0.573998	742	0.442179	1126	-31.0827	-15.4582
UUUAUG	3745	642	1653	1058	3353	0.573994	743	0.439632	1290	-30.8287	-14.4889
UCUCCA	823	143	371	239	753	0.573949	744	0.429273	2200	-31.351	-15.4879
GCUAUC	1214	200	564	335	1099	0.573933	745	0.432632	1871	-31.5727	-16.0034
CGGAUA	1338	222	621	359	1202	0.573894	746	0.464082	206	-31.0798	-15.7904
AUAUCC	874	147	382	247	776	0.573893	747	0.440081	1261	-30.4105	-15.2257
AUACCC	490	79	232	130	441	0.573892	748	0.470544	103	-31.3275	-16.1335
CAUAGU	1492	253	667	434	1354	0.573874	749	0.437166	1482	-30.9205	-15.2042
UGAAAA	1089	184	461	322	967	0.57386	750	0.443687	1019	-29.6013	-13.9962
ACUGAU	1284	209	572	353	1134	0.573848	751	0.43214	1909	-30.5404	-15.224
ACUUAU	1581	266	741	431	1438	0.573835	752	0.463032	221	-29.703	-14.4528
UAAGUC	1451	250	607	436	1293	0.573832	753	0.435117	1658	-30.3721	-14.7588
AACGCA	581	94	268	148	510	0.573789	754	0.443888	1008	-30.268	-15.0848
UAUAGC	1389	235	591	409	1235	0.573786	755	0.45359	516	-30.7382	-15.1784
CUCAUC	874	140	397	244	781	0.573779	756	0.441731	1153	-31.0159	-15.5463
UCAACA	675	101	318	177	596	0.573743	757	0.426269	2455	-29.5546	-14.4374
AAUCAC	624	104	277	187	568	0.573742	758	0.446871	835	-29.7161	-14.5439
UCAAGA	956	155	427	260	842	0.573695	759	0.455634	429	-30.1118	-14.8136
GAAUCU	1364	234	601	392	1227	0.573693	760	0.451168	629	-30.6704	-15.2135
GAUUAC	1334	226	617	371	1214	0.573654	761	0.448063	764	-30.2391	-15.1669
GCUAAA	929	151	422	259	832	0.573654	762	0.43276	1863	-30.2199	-14.7789
AGAUAA	1184	198	518	346	1062	0.573653	763	0.440631	1228	-29.6584	-14.16
ACAACU	625	101	276	175	552	0.573635	764	0.438121	1398	-30.2173	-14.6905
AAAGCU	1004	170	459	277	906	0.57358	765	0.450898	642	-30.0366	-14.8896
GGGAUA	2244	373	991	626	1990	0.573577	766	0.443274	1045	-31.1854	-15.6317
UAAGGA	1567	271	684	451	1406	0.573538	767	0.443223	1047	-30.3449	-14.8212
UAACGG	1474	267	616	428	1311	0.573521	768	0.44919	711	-30.9366	-15.4117
GAAACG	920	141	433	247	821	0.573478	769	0.433984	1763	-30.4579	-15.1075
GAACUU	1297	219	549	374	1142	0.573458	770	0.443499	1029	-30.4176	-15.3356
CUUACU	1207	207	522	336	1065	0.57345	771	0.455162	450	-30.6313	-15.198
GACUUA	1275	203	583	359	1145	0.573442	772	0.439559	1297	-30.4113	-15.25
UUUGCA	2050	330	940	554	1824	0.573424	773	0.429673	2158	-31.0545	-14.9298
AGAGAA	1031	171	451	279	901	0.573405	774	0.426667	2422	-29.914	-14.583
AGAAUC	946	164	407	273	844	0.573354	775	0.441068	1207	-30.2661	-14.9776
CCAUUU	1279	209	579	351	1139	0.573298	776	0.426484	2436	-30.8534	-15.0918
CAAUAC	616	116	254	186	556	0.573293	777	0.454116	491	-29.7222	-14.5904
GACUAU	1290	208	590	351	1149	0.573289	778	0.449853	686	-30.8087	-15.3926
AGUCUA	1424	246	628	423	1297	0.573203	779	0.437608	1446	-30.661	-15.1465
GCCAAU	823	133	387	231	751	0.573191	780	0.42547	2514	-31.3969	-15.6157
GCGAUA	1228	212	531	356	1099	0.573191	781	0.442719	1085	-31.2304	-15.7133
AAAAGU	1293	236	538	388	1162	0.573189	782	0.426884	2406	-29.9136	-13.9764
AGUUAC	1381	241	604	416	1261	0.573175	783	0.437842	1422	-30.0634	-14.6968
AACUCC	589	92	281	155	528	0.573171	784	0.490698	5	-31.1805	-15.5859
CCUCAU	835	143	377	240	760	0.573126	785	0.42442	2601	-31.453	-16.0914
AGGACC	806	134	375	229	738	0.573122	786	0.438531	1371	-32.0988	-16.8354
AUCCUA	844	150	383	236	769	0.573118	787	0.433386	1809	-30.4215	-15.2601
UUACUC	1315	227	560	388	1175	0.573051	788	0.468086	145	-30.3241	-14.8005
CAAUCC	555	80	267	144	491	0.573037	789	0.426018	2473	-30.978	-15.4807
UUAGAU	2468	436	1104	712	2252	0.573005	790	0.447751	785	-30.2811	-14.6093
ACAACC	391	77	166	116	359	0.572982	791	0.448388	751	-30.6872	-15.8173
GCAUUU	2055	384	844	614	1842	0.572973	792	0.450949	639	-30.6546	-14.968
UAGAAA	1096	189	478	316	983	0.572956	793	0.443849	1011	-29.9853	-14.3858
UACACU	889	146	412	247	805	0.572932	794	0.451297	623	-30.1823	-14.9521
UUCGAA	1377	237	604	393	1234	0.572894	795	0.439567	1295	-30.1358	-14.6106
UAACAA	655	121	277	188	586	0.572893	796	0.434516	1707	-28.7929	-13.8655
UUUACG	2105	360	897	609	1866	0.572858	797	0.443223	1048	-30.5314	-14.7797
UGCUCA	1237	215	551	348	1114	0.572852	798	0.431946	1931	-31.5872	-16.063
CAUUGA	1288	209	575	365	1149	0.572765	799	0.441952	1143	-30.2493	-15.1312
CUAUCU	1218	205	546	352	1103	0.572756	800	0.439599	1294	-30.6587	-15.2141
AUCGUA	1410	234	628	389	1251	0.572734	801	0.447466	805	-30.3004	-14.7808
CUUCUA	1175	194	530	327	1051	0.57272	802	0.44286	1071	-30.8464	-15.0693
UUACCG	1228	206	544	349	1099	0.572711	803	0.420427	2961	-31.5769	-15.9758
UUUUGC	3042	517	1355	840	2712	0.572701	804	0.431673	1962	-31.4193	-15.0058
AUUGAA	1572	270	698	451	1419	0.572662	805	0.456723	387	-29.4469	-14.3267
CUAAGU	1390	252	610	400	1262	0.572608	806	0.438478	1375	-30.95	-15.1677
AAGUUA	1806	294	817	516	1627	0.572602	807	0.440259	1252	-29.7059	-13.9885
UUAAGC	1441	242	633	388	1263	0.572558	808	0.428073	2296	-30.3325	-14.8586
AGACGC	733	118	358	187	663	0.572547	809	0.453086	536	-31.8875	-16.359
AAUUGC	1518	256	677	435	1368	0.572525	810	0.431938	1932	-30.6871	-15.0683
AUCAGU	1503	265	665	422	1352	0.57252	811	0.433901	1768	-30.3842	-14.8202
CUACCA	479	81	203	132	416	0.572517	812	0.434174	1739	-31.3551	-16.0678
CUUUUG	2975	529	1256	874	2659	0.572492	813	0.43603	1564	-31.3887	-15.294
AUCAAA	742	118	327	201	646	0.57247	814	0.431743	1952	-28.8069	-13.8057
UAUAUG	2612	455	1198	757	2410	0.57245	815	0.459352	309	-30.9701	-15.2133
CACUAC	566	101	239	168	508	0.572446	816	0.398577	3971	-30.1835	-15.1434
UACAGA	840	156	343	242	741	0.572411	817	0.445231	932	-30.5698	-15.1533
AACCCG	610	100	279	170	549	0.572343	818	0.418517	3111	-31.9444	-16.3458
CCAUUG	1206	205	547	348	1100	0.572342	819	0.454006	497	-31.4301	-15.7086
AGAAUU	1633	279	704	488	1471	0.572309	820	0.456773	383	-29.6236	-14.3245
ACGAAC	579	95	270	168	533	0.572307	821	0.456892	376	-30.6387	-15.7192
AGAUAC	867	145	383	240	768	0.572254	822	0.471608	92	-30.0461	-15.2492
UUCAGA	1391	246	603	389	1238	0.572251	823	0.431851	1944	-30.352	-14.7594
GAGUUU	3430	606	1478	990	3074	0.572234	824	0.458484	341	-31.0708	-14.9901
AUCGAA	844	159	341	261	761	0.572221	825	0.454612	469	-29.8129	-14.6621
GAAUAG	1505	264	640	441	1345	0.572212	826	0.451455	612	-30.7156	-15.2196
CACUUA	931	157	421	248	826	0.572168	827	0.466338	168	-30.0278	-14.7382
AAACGC	648	103	297	174	574	0.572157	828	0.440365	1246	-30.4287	-15.0407
GGAUUU	3270	570	1362	973	2905	0.572125	829	0.453111	534	-31.1081	-15.2699
UACGUU	2142	383	913	631	1927	0.572105	830	0.453785	505	-30.9735	-15.1087
UGAAUC	1294	215	586	362	1163	0.572075	831	0.441577	1166	-30.5718	-15.1051
CCUCAA	505	82	229	143	454	0.572048	832	0.442514	1100	-31.2996	-15.8501
UCUCUA	1230	201	552	352	1105	0.572047	833	0.439358	1310	-30.566	-14.9339
CUGAAU	1236	217	561	349	1127	0.571967	834	0.455122	451	-30.6844	-15.3107
AAACUA	702	124	293	201	618	0.571922	835	0.44483	958	-29.4338	-14.2966
GCUCAA	878	143	402	233	778	0.571897	836	0.452415	564	-31.2245	-15.674
GACUAA	896	156	394	258	808	0.571891	837	0.453374	525	-30.1918	-15.028
GAUUCU	1954	329	845	568	1742	0.571862	838	0.442783	1079	-30.6953	-15.0795
ACAAGC	569	106	228	176	510	0.571805	839	0.451373	619	-30.7894	-15.6842
UCUUCA	1394	248	617	396	1261	0.571802	840	0.450463	661	-30.3443	-14.6376
GAUAGA	1375	237	596	395	1228	0.571774	841	0.439981	1267	-30.7342	-15.1887
AGGCUA	1327	215	599	366	1180	0.571745	842	0.424899	2564	-31.4052	-15.8261
CAGCUU	1268	211	595	351	1157	0.571716	843	0.446771	840	-31.1364	-15.6588
ACAUUA	1081	178	479	311	968	0.57168	844	0.441667	1156	-29.7435	-14.4177
CAUACA	593	102	257	170	529	0.571595	845	0.446851	836	-30.3619	-15.457
AAACGU	1140	180	538	305	1023	0.571577	846	0.439001	1335	-30.4947	-14.7852
UUACGU	2214	382	989	605	1976	0.571575	847	0.438561	1364	-30.9866	-15.115
AAAGAG	1145	203	497	337	1037	0.571565	848	0.433247	1822	-29.9051	-14.5017
AGGAAU	1577	281	650	465	1396	0.57155	849	0.46758	153	-30.3727	-14.9128
UGACUA	1258	223	550	365	1138	0.571526	850	0.426263	2457	-30.6929	-15.4324
CAUUCC	864	153	389	239	781	0.571518	851	0.444575	968	-31.305	-15.874
ACCAGA	588	91	283	150	524	0.571506	852	0.398458	3972	-31.0415	-16.1073
ACGUUC	1291	214	613	353	1180	0.571492	853	0.439241	1318	-31.1362	-15.4209
CUUACA	869	149	388	253	790	0.571465	854	0.468159	144	-30.4165	-15.207
AACCUU	859	154	371	257	782	0.571453	855	0.446789	839	-30.5216	-15.3094
CAAGAC	531	82	237	145	464	0.571452	856	0.456947	375	-31.0805	-15.7039
AGUAAC	1000	156	468	258	882	0.571447	857	0.451452	613	-30.1562	-14.7681
GCUAAU	1321	218	605	366	1189	0.571405	858	0.424529	2599	-30.5997	-15.1559
CUUCUU	1866	310	863	512	1685	0.571373	859	0.451482	610	-30.758	-14.955
UCGAGA	1137	192	515	322	1029	0.571362	860	0.465595	178	-30.9638	-15.4556
UUGUCA	2160	375	925	619	1919	0.571317	861	0.447122	820	-30.7605	-14.724
UGAAAU	1562	261	698	434	1393	0.571314	862	0.431244	2002	-29.7487	-14.1324
AUCUAA	1009	173	442	298	913	0.571276	863	0.437703	1439	-29.9597	-14.382
CUAUGC	1106	192	503	309	1004	0.571266	864	0.435002	1665	-31.3069	-16.1607
AUACGC	871	137	411	238	786	0.571247	865	0.460959	274	-31.1132	-15.8056
CCUUAA	870	156	372	250	778	0.571235	866	0.443733	1017	-30.7137	-15.5795
UCUGAU	1798	304	792	500	1596	0.571211	867	0.436421	1540	-30.8676	-15.0701
AAGACG	874	150	399	236	785	0.571202	868	0.452758	549	-31.0937	-15.6135
AUCAUC	902	159	388	250	797	0.571188	869	0.455642	426	-30.3869	-14.974
AUUGUA	2485	443	1054	737	2234	0.57117	870	0.428384	2274	-30.0717	-14.2509
CAGUAG	1341	244	571	406	1221	0.57116	871	0.44949	700	-31.4166	-15.7371
CUUUCU	1937	326	896	526	1748	0.571156	872	0.441657	1157	-30.683	-14.9496
AUGAUU	2447	420	1077	692	2189	0.571148	873	0.441711	1155	-30.1818	-14.9598
ACACUA	652	97	307	186	590	0.571136	874	0.451876	589	-30.0514	-15.0163
UUCAUC	1444	251	637	413	1301	0.571081	875	0.423816	2655	-30.3309	-14.6754
CACAAC	402	70	190	104	364	0.57108	876	0.441975	1142	-30.4759	-15.0643
GUACAC	862	138	403	236	777	0.571077	877	0.432788	1859	-31.3391	-15.7845
UCUGAA	1267	217	564	353	1134	0.571041	878	0.442157	1128	-30.4899	-15.0189
AACCAG	572	95	265	148	508	0.571015	879	0.412815	3486	-30.7484	-15.4952
AGCCAG	788	135	349	221	705	0.571011	880	0.42157	2858	-31.5166	-16.4383
ACUGUU	2079	341	918	596	1855	0.571006	881	0.449064	717	-30.9412	-15.1499
AUCUGC	1284	222	568	356	1146	0.570988	882	0.429059	2215	-31.4935	-15.9773
CCAGAU	791	133	350	226	709	0.570947	883	0.423695	2663	-31.1049	-16.1341
AACUUG	1374	236	604	402	1242	0.570944	884	0.437774	1430	-30.5065	-15.0266
AGCUUU	2011	348	878	577	1803	0.570944	885	0.451623	605	-30.648	-15.0756
AUGACU	1290	211	624	360	1195	0.570943	886	0.439512	1304	-30.7033	-15.3817
GCUACU	1116	193	508	318	1019	0.570918	887	0.447185	816	-31.5943	-16.1069
UUAUGU	3849	699	1634	1131	3464	0.570917	888	0.438925	1340	-30.778	-14.415
ACCGCA	599	110	244	182	536	0.570909	889	0.453314	528	-31.5381	-16.1517
ACUUUG	2131	387	910	611	1908	0.570901	890	0.431558	1974	-31.2918	-15.3629
GCCGAC	778	130	359	223	712	0.570869	891	0.42092	2919	-32.9994	-17.4333
GAAGAA	936	158	406	263	827	0.570841	892	0.467251	159	-30.1112	-14.6351
CUUGUA	1902	339	832	542	1713	0.57081	893	0.448968	719	-30.9173	-15.0204
AACACG	613	111	261	166	538	0.570756	894	0.411461	3557	-30.6017	-15.3042
CAUAUC	925	160	407	255	822	0.570751	895	0.456442	400	-30.2149	-15.6025
CGCAUA	857	149	389	251	789	0.570723	896	0.460623	287	-30.84	-15.9536
CACCAA	371	55	184	94	333	0.570706	897	0.427889	2316	-31.08	-15.4677
AGAAGA	944	159	420	262	841	0.570698	898	0.444023	996	-30.1326	-14.7103
UAUCCA	895	170	372	271	813	0.570692	899	0.462812	224	-30.3934	-15.1036
UUCACC	839	147	359	250	756	0.570691	900	0.446308	874	-30.7769	-15.3005
AACGUC	947	158	440	263	861	0.57069	901	0.412993	3475	-31.1828	-15.7691
UUAAUG	2595	457	1095	741	2293	0.570686	902	0.438659	1356	-30.241	-14.4319
CCUAUG	1176	208	532	331	1071	0.570674	903	0.432879	1849	-31.9484	-16.3907
UUCUGA	1873	321	823	528	1672	0.570606	904	0.443038	1054	-30.5112	-14.8264
AUGUCA	1522	271	728	417	1416	0.570576	905	0.434459	1714	-30.6381	-15.0124
CUUUCC	1216	201	562	316	1079	0.570573	906	0.432279	1899	-31.481	-15.4029
AAUCAU	1148	203	487	323	1013	0.570541	907	0.443788	1014	-29.4063	-14.1001
AAGAUC	945	171	402	262	835	0.570497	908	0.461292	269	-29.9589	-14.8298
AAUACG	1025	173	473	282	928	0.570485	909	0.42475	2580	-29.9739	-14.6194
AUCCAU	879	162	363	263	788	0.570477	910	0.441424	1179	-30.5977	-15.0733
CUUAGC	1190	192	549	324	1065	0.57047	911	0.457114	369	-31.3196	-15.8934
CUGAUC	1158	189	540	310	1039	0.570459	912	0.415368	3332	-31.3093	-15.8563
CGCAUU	1250	220	553	365	1138	0.570447	913	0.443513	1028	-31.0425	-15.1118
AUUGCA	1350	223	618	371	1212	0.570442	914	0.434391	1719	-30.4135	-14.8244
AUUGUC	2180	373	955	627	1955	0.570416	915	0.446272	878	-30.791	-15.0001
UAAUGA	1642	282	745	459	1486	0.570407	916	0.424634	2593	-29.6326	-14.3072
AUCAGG	1404	241	618	398	1257	0.570404	917	0.433744	1784	-30.8572	-15.4978
UACGAA	929	161	389	281	831	0.570397	918	0.457533	362	-29.8924	-14.734
AUGAAA	1107	184	484	297	965	0.570388	919	0.443795	1013	-29.4598	-14.3014
CUACGU	1222	229	530	342	1101	0.570374	920	0.467049	160	-31.5565	-15.8046
GCCAUU	1212	190	569	331	1090	0.570363	921	0.43162	1967	-31.5749	-15.8512
CAUAAC	617	106	269	174	549	0.570331	922	0.444669	963	-29.9293	-14.9735
UUCCAC	874	138	415	225	778	0.570236	923	0.454563	472	-31.1816	-15.2773
CACAUC	598	96	292	163	551	0.57022	924	0.412087	3533	-30.7758	-15.5138
CACCUA	504	83	236	139	458	0.570209	925	0.45365	514	-31.1224	-15.7251
UCCUCA	780	131	352	223	706	0.570161	926	0.442451	1106	-31.2058	-15.529
AUUGCU	2027	344	888	576	1808	0.570148	927	0.422349	2794	-30.8385	-15.1008
ACCCAC	364	61	167	102	330	0.570143	928	0.434303	1727	-31.3468	-16.3653
ACGCUA	845	149	379	232	760	0.570139	929	0.44981	687	-30.8873	-15.6954
CUCACU	825	129	404	204	737	0.570088	930	0.452618	553	-31.0892	-15.3844
AAGACC	564	94	246	153	493	0.570056	931	0.477739	32	-30.8541	-15.6679
GUCAUC	1372	224	644	362	1230	0.570048	932	0.450924	640	-31.0453	-15.5154
AAUGCG	1370	242	609	392	1243	0.570046	933	0.430124	2113	-31.5192	-15.6046
UUGUUC	3098	529	1394	865	2788	0.570013	934	0.441309	1193	-30.9347	-14.582
AGUCAA	1017	174	467	288	929	0.570007	935	0.423926	2648	-29.8823	-14.3445
UGUAAA	1695	306	732	476	1514	0.570005	936	0.433709	1790	-30.0474	-14.0085
AAAAGG	1296	223	565	367	1155	0.569998	937	0.445289	930	-30.1389	-14.4795
UUCCAG	1202	205	555	323	1083	0.569996	938	0.441992	1140	-31.1382	-15.3696
UUUCUG	3073	523	1369	870	2762	0.569982	939	0.451991	585	-31.1429	-14.9845
UGGAAU	2210	380	985	617	1982	0.569964	940	0.433811	1778	-31.1999	-15.4733
UUGCUA	1837	330	813	529	1672	0.569964	941	0.433015	1839	-30.9265	-15.2074
ACAUCG	933	157	437	257	851	0.569957	942	0.42784	2322	-30.9337	-15.6771
UAAGGC	1376	242	575	397	1214	0.56995	943	0.446991	829	-31.235	-15.6064
UUCGUU	3348	573	1505	946	3024	0.569899	944	0.444068	994	-30.8341	-14.6132
UCAAAG	1012	182	423	273	878	0.569882	945	0.440602	1230	-30.0797	-14.3883
UGAGAA	1366	232	605	395	1232	0.569857	946	0.43309	1835	-30.5894	-15.1489
CCUCUU	1222	211	565	331	1107	0.569855	947	0.450243	671	-31.7772	-15.8517
AAGUUC	1489	260	658	415	1333	0.569851	948	0.459446	307	-30.3711	-14.5882
CGAAAU	954	172	399	276	847	0.569847	949	0.476013	49	-29.9991	-14.6699
AACAGA	659	108	299	187	594	0.569829	950	0.413375	3446	-29.9984	-14.7931
CUCCCA	539	87	244	153	484	0.569826	951	0.444406	978	-31.8627	-16.4035
UCCAUC	872	141	413	241	795	0.56978	952	0.423595	2668	-31.0578	-15.252
CCCAUU	725	127	314	204	645	0.569762	953	0.446511	866	-31.1561	-15.4711
AGAGAC	853	145	352	246	743	0.569745	954	0.443616	1023	-30.8069	-15.7275
CCCAAC	350	67	147	108	322	0.569741	955	0.44777	783	-31.0761	-15.7402
UACCAU	797	133	355	220	708	0.569717	956	0.440582	1232	-30.7071	-15.6415
ACAUCU	900	155	395	255	805	0.569716	957	0.455341	442	-30.6032	-15.1557
AGCACA	581	98	262	154	514	0.569702	958	0.415546	3325	-30.7075	-15.5735
CAAUUG	1445	261	618	422	1301	0.569701	959	0.43376	1781	-30.7146	-15.0623
AAGCUA	904	152	403	240	795	0.569669	960	0.43714	1483	-30.059	-15.0428
CUAAAU	1057	175	466	302	943	0.569638	961	0.439701	1283	-29.6375	-14.3234
GAGCUU	1715	289	740	495	1524	0.569629	962	0.450315	669	-31.6771	-16.2359
UUUGUU	5587	984	2485	1569	5038	0.569618	963	0.436972	1490	-30.9686	-14.1983
UCCAAG	776	137	342	223	702	0.569614	964	0.435744	1594	-31.1145	-15.6611
AUACGU	1404	238	638	396	1272	0.569608	965	0.444002	997	-30.6687	-15.3571
AAUGGA	1562	267	669	445	1381	0.569581	966	0.451189	627	-30.5484	-14.9241
UAUCUC	1338	228	607	361	1196	0.56956	967	0.44654	865	-30.549	-15.1278
AAGCUU	1400	232	631	385	1248	0.569537	968	0.440275	1250	-30.2738	-14.9467
AACUGG	1416	238	631	386	1255	0.569527	969	0.448496	744	-31.4145	-16.0517
AUCUGA	1236	226	515	364	1105	0.569527	970	0.456517	394	-30.4456	-15.3111
ACGAUU	1375	235	607	386	1228	0.56952	971	0.460899	277	-29.9962	-14.7803
UAUGCA	1417	248	629	402	1279	0.569479	972	0.4559	416	-30.6305	-15.1322
ACCUUU	1248	220	547	354	1121	0.569476	973	0.446056	892	-31.2469	-15.7867
UAAGAU	1688	299	719	482	1500	0.569458	974	0.447445	806	-29.7838	-14.2607
CGUAUA	1466	258	645	416	1319	0.56943	975	0.445229	933	-30.912	-15.3164
AACCAC	393	69	183	113	365	0.569366	976	0.428092	2295	-30.852	-15.6256
UGUUAU	3662	638	1587	1050	3275	0.56933	977	0.440702	1224	-30.5869	-14.4901
GCACAG	841	149	345	252	746	0.569324	978	0.43882	1344	-31.51	-16.2863
UCUUCU	1909	327	826	544	1697	0.569318	979	0.451807	595	-30.776	-14.7874
UUUGAG	3071	560	1277	896	2733	0.569305	980	0.441186	1201	-30.8541	-14.9534
AGUUUA	2746	484	1175	790	2449	0.569299	981	0.456465	396	-30.0002	-14.203
CAGUUA	1449	281	591	432	1304	0.569262	982	0.436028	1565	-30.1809	-14.8792
CAUCAG	943	158	441	254	853	0.569259	983	0.409702	3650	-30.6992	-15.3758
UUAUGC	1994	351	886	558	1795	0.569257	984	0.451105	632	-31.0054	-15.3118
GACACA	595	96	275	155	526	0.569254	985	0.45114	630	-30.9223	-15.7422
GAAUCG	1324	227	593	364	1184	0.569237	986	0.437376	1466	-31.0897	-15.6543
UCACCU	772	136	341	218	695	0.569233	987	0.459837	303	-31.2773	-15.8523
GAUUGC	1825	326	803	519	1648	0.569223	988	0.420276	2969	-31.6319	-15.8367
UUGUUU	5623	984	2456	1586	5026	0.56922	989	0.439687	1284	-30.8619	-14.0414
UCGAUU	1957	351	864	551	1766	0.569209	990	0.445087	946	-30.2679	-14.819
AUAGCA	942	172	382	281	835	0.569205	991	0.425998	2475	-30.1873	-15.0139
GCUAUU	2032	356	910	565	1831	0.569158	992	0.441402	1182	-30.915	-15.1547
UUCGAG	1821	309	852	487	1648	0.569135	993	0.446013	896	-31.5029	-15.6017
GGAGAA	1360	241	600	386	1227	0.569131	994	0.417372	3190	-30.7748	-15.3511
UAUAAG	1771	310	764	512	1586	0.569115	995	0.435786	1588	-29.8276	-14.3335
CCAAAA	430	66	205	117	388	0.569105	996	0.395394	4013	-29.9147	-14.7064
UUAAAG	1792	307	792	505	1604	0.569066	997	0.432088	1918	-29.7163	-14.1372
ACUACA	565	102	239	168	509	0.569065	998	0.410624	3600	-29.8026	-14.7881
CGUUAU	2061	351	925	588	1864	0.569053	999	0.432693	1866	-30.5662	-14.7838
GGCAUU	2012	354	876	563	1793	0.569052	1000	0.443671	1021	-31.5179	-15.9023
CUUUCA	1315	224	611	357	1192	0.569023	1001	0.426378	2444	-30.3509	-14.846
ACGACA	597	101	267	167	535	0.569012	1002	0.46076	281	-30.6343	-15.224
CAUUUG	2137	388	925	604	1917	0.56897	1003	0.427463	2355	-31.1115	-15.0603
AGCCUA	748	130	343	197	670	0.568944	1004	0.441321	1190	-31.2526	-16.1372
AUAAGC	1007	171	441	276	888	0.568938	1005	0.460598	290	-30.144	-14.8744
CGCUUU	1851	314	876	513	1703	0.568924	1006	0.429989	2121	-31.5965	-15.7301
UUGACA	1324	234	571	370	1175	0.568879	1007	0.446294	876	-30.5195	-15.1472
CUUCAC	940	159	421	257	837	0.568863	1008	0.430784	2048	-31.1246	-15.5685
AUUGAC	1343	247	556	398	1201	0.568844	1009	0.427366	2365	-30.5958	-15.3478
UCCAAC	504	85	232	144	461	0.568836	1010	0.441515	1169	-30.9427	-15.3171
GUCAUA	1462	259	638	408	1305	0.568821	1011	0.436201	1551	-30.8017	-15.096
GAGUUA	2264	398	996	640	2034	0.568807	1012	0.447531	800	-30.7965	-15.141
UACGAC	812	144	353	227	724	0.568796	1013	0.451338	620	-30.8046	-15.5124
ACCUCA	564	95	254	162	511	0.568761	1014	0.461955	250	-31.3294	-16.1123
AUCAAC	638	113	265	180	558	0.56873	1015	0.428599	2257	-29.6058	-14.4359
GUUUAU	3968	703	1718	1124	3545	0.568727	1016	0.450287	670	-30.6006	-14.2346
UGCACU	1207	213	544	338	1095	0.568698	1017	0.447391	807	-31.6223	-15.9257
CAGCUA	766	126	345	212	683	0.568685	1018	0.431036	2027	-30.929	-15.6188
UAAAGU	1761	302	773	497	1572	0.56868	1019	0.441727	1154	-30.0031	-14.076
CUCCAU	824	133	377	230	740	0.568678	1020	0.424797	2574	-31.5109	-15.7978
CUGUUA	1992	334	898	537	1769	0.568648	1021	0.454031	495	-31.2009	-15.3496
AAAAAG	866	158	366	259	783	0.568637	1022	0.453667	513	-29.4006	-13.7881
CACGUA	869	148	387	243	778	0.568632	1023	0.447745	786	-30.9334	-15.5014
UAGGAU	2198	375	960	616	1951	0.56857	1024	0.437784	1429	-31.0334	-15.5928
CCAAAU	591	105	261	170	536	0.568569	1025	0.418866	3081	-30.1116	-14.9853
AUGGAC	1328	226	587	379	1192	0.568566	1026	0.434026	1759	-31.593	-16.0971
ACGAUC	817	149	371	223	743	0.56855	1027	0.437587	1450	-30.5909	-15.4197
AAAGUA	1199	207	539	329	1075	0.568547	1028	0.432532	1878	-29.6025	-14.083
CGAUUC	1200	198	540	348	1086	0.568505	1029	0.437055	1487	-30.9958	-15.6298
AAGGAC	898	141	428	240	809	0.568486	1030	0.455314	443	-31.0234	-15.8801
ACACGU	951	172	412	278	862	0.568449	1031	0.434886	1677	-31.0016	-15.5341
UAUUCA	1702	291	760	474	1525	0.568444	1032	0.427191	2379	-29.3641	-13.9977
UACCUC	742	130	343	200	673	0.568433	1033	0.453556	519	-31.5331	-16.4445
UCAUAG	1369	246	590	391	1227	0.568408	1034	0.436109	1561	-30.7841	-15.1382
CCCGAA	456	74	203	130	407	0.568394	1035	0.427396	2361	-32.0681	-16.376
GACGAU	1185	206	537	320	1063	0.568391	1036	0.433105	1832	-30.9659	-15.6318
ACUAUG	1320	225	587	366	1178	0.568373	1037	0.453599	515	-30.688	-15.3582
GUCUUA	2069	341	926	562	1829	0.568361	1038	0.43777	1431	-30.9495	-14.9274
CCCACU	511	78	245	136	459	0.568357	1039	0.420632	2942	-32.2154	-16.6147
AAACGA	671	110	308	189	607	0.568355	1040	0.421293	2884	-29.3548	-14.2623
AUUCCC	797	133	367	215	715	0.568351	1041	0.447315	809	-31.1158	-15.2828
CUGAUU	1805	308	792	511	1611	0.568343	1042	0.443363	1036	-30.7961	-15.1687
UCUAAA	1041	183	460	292	935	0.568341	1043	0.453539	521	-29.6833	-14.0343
GACCUU	1165	200	511	330	1041	0.56834	1044	0.435286	1635	-31.3249	-16.1765
CGUCAU	1459	239	671	388	1298	0.568322	1045	0.408264	3711	-31.2024	-15.4043
AGGAUA	1540	278	692	418	1388	0.568286	1046	0.446388	872	-30.4349	-15.2698
UCUAAG	1348	229	598	379	1206	0.568286	1047	0.443408	1034	-30.7249	-15.1204
AUAGAG	1564	254	735	402	1391	0.568272	1048	0.446768	841	-31.2321	-15.3221
CUGUAA	1279	222	565	353	1140	0.568259	1049	0.444259	984	-30.6143	-14.9438
GGCUAA	1351	223	619	352	1194	0.568218	1050	0.41373	3430	-31.4844	-15.9411
UACUCA	875	145	397	239	781	0.568206	1051	0.44705	823	-30.2962	-14.8936
UAUCGU	2178	391	961	612	1964	0.568182	1052	0.448336	753	-30.8145	-15.0144
UACUAA	990	176	435	281	892	0.568172	1053	0.456635	390	-29.7492	-14.5607
ACGUCC	891	138	446	228	812	0.568155	1054	0.397978	3979	-32.6206	-16.9989
AGUAUC	1382	249	604	391	1244	0.568119	1055	0.429861	2138	-30.5312	-15.1044
CACAUU	1009	169	451	279	899	0.568117	1056	0.443942	1002	-30.4152	-14.8731
UUGCUU	2902	521	1256	834	2611	0.568108	1057	0.447565	798	-31.1629	-15.099
AGACCG	774	133	360	209	702	0.568105	1058	0.446242	883	-31.856	-16.3855
AUCUUG	2063	362	910	572	1844	0.568097	1059	0.425235	2537	-30.9939	-15.2587
CGUAUC	1285	221	564	361	1146	0.568073	1060	0.454404	480	-31.5994	-16.1221
CAACUG	871	154	387	235	776	0.56804	1061	0.446733	845	-31.3113	-15.7635
UGAACU	1202	206	536	339	1081	0.567968	1062	0.454509	475	-30.6273	-15.3071
UAAAGC	983	178	426	282	886	0.567965	1063	0.43335	1813	-29.9615	-14.7914
GAUACU	1253	226	532	348	1106	0.567959	1064	0.45698	373	-30.5776	-15.3641
CCUAGA	740	127	323	206	656	0.567944	1065	0.437341	1469	-31.949	-16.9001
UAACGU	1442	260	635	409	1304	0.567862	1066	0.443984	998	-30.5831	-14.7994
ACGAUA	914	164	398	261	823	0.567856	1067	0.453345	527	-30.058	-14.9227
UAUAGU	2488	443	1067	711	2221	0.567854	1068	0.441775	1150	-30.9566	-15.143
CUUACG	1291	226	585	344	1155	0.567818	1069	0.439552	1300	-31.2848	-15.7928
GCACAA	561	97	251	148	496	0.567803	1070	0.434591	1699	-30.4855	-15.0879
ACUACG	834	141	389	233	763	0.567797	1071	0.429276	2198	-30.8789	-15.6669
GGCUAC	1212	205	570	316	1091	0.567772	1072	0.455882	417	-32.5453	-16.8951
UGACAU	1356	211	639	365	1215	0.567694	1073	0.444162	988	-30.9464	-15.4559
GUUCCA	1255	204	601	327	1132	0.567692	1074	0.447007	828	-31.5695	-15.4993
UUGUUA	3664	655	1591	1037	3283	0.567688	1075	0.42996	2129	-30.7304	-14.6251
CAGAUU	1395	241	604	389	1234	0.567662	1076	0.438646	1358	-30.0614	-14.7833
UUUGAA	2338	435	998	697	2130	0.567656	1077	0.45586	418	-30.0147	-14.2357
AAAGGC	1025	173	473	283	929	0.567651	1078	0.439881	1273	-30.9268	-15.5221
UACUUC	1219	223	524	349	1096	0.567651	1079	0.450734	652	-30.2577	-14.8409
UUCAAC	953	176	416	262	854	0.56763	1080	0.430516	2073	-30.2184	-14.6009
UCACCA	570	94	272	153	519	0.567605	1081	0.43552	1616	-30.5924	-15.2988
UCGUUA	2115	383	906	615	1904	0.56759	1082	0.445921	898	-30.5272	-14.6612
UACGCA	805	137	349	220	706	0.567581	1083	0.447646	794	-30.8086	-15.5538
UUGCAU	1971	343	874	546	1763	0.567576	1084	0.427255	2376	-31.177	-15.3813
CUCGAA	856	145	390	239	774	0.567572	1085	0.440672	1226	-30.9261	-15.7247
GUUUCU	3114	542	1421	859	2822	0.567559	1086	0.43612	1559	-31.0853	-14.8526
UGCAAA	941	175	395	275	845	0.567559	1087	0.403522	3863	-30.4421	-14.9614
AGCGCU	1110	192	515	304	1011	0.567527	1088	0.44268	1088	-32.244	-16.6301
CAUCUG	1244	214	569	335	1118	0.567514	1089	0.433875	1771	-31.6301	-15.9807
GUUAUC	2168	386	937	617	1940	0.567484	1090	0.439624	1291	-30.6278	-14.9506
CAUAGC	749	125	337	209	671	0.567453	1091	0.417664	3173	-31.2238	-15.6246
CGAAUA	905	160	404	251	815	0.56744	1092	0.468347	136	-29.9102	-15.0755
GUAACG	1371	236	632	360	1228	0.56744	1093	0.430617	2062	-31.0438	-15.3407
UUGGAU	3152	551	1391	890	2832	0.567409	1094	0.432781	1861	-31.472	-15.304
AGCCUU	1212	206	542	342	1090	0.567388	1095	0.430138	2112	-31.6823	-16.3068
UAGUCA	1439	250	623	412	1285	0.567374	1096	0.442968	1063	-30.5178	-14.8634
ACGCAU	922	163	401	255	819	0.567372	1097	0.4434	1035	-30.8842	-15.7274
AAGCAU	1004	184	430	284	898	0.567353	1098	0.429727	2152	-30.163	-14.9951
UCAAUG	1468	253	669	407	1329	0.567323	1099	0.444978	949	-30.6605	-14.7863
CCAUGU	1266	225	576	351	1152	0.567322	1100	0.453733	508	-31.6692	-15.8615
CGAGAC	722	116	338	190	644	0.56731	1101	0.453874	504	-31.5555	-16.308
CCACGA	551	94	267	151	512	0.567296	1102	0.428964	2224	-31.7722	-16.4149
UUAGUU	3785	667	1641	1069	3377	0.567278	1103	0.434068	1754	-30.8406	-14.5738
AGAUUC	1337	245	582	372	1199	0.56726	1104	0.436851	1498	-30.3831	-14.9435
UGACAA	835	148	382	226	756	0.567238	1105	0.438	1408	-30.6801	-15.1685
GGUUUU	5582	989	2447	1591	5027	0.567237	1106	0.440899	1216	-31.278	-14.9014
GGAUUA	2348	424	1044	648	2116	0.567218	1107	0.446132	889	-30.6348	-15.1539
AUAGUA	1631	287	698	473	1458	0.567182	1108	0.424233	2617	-30.4148	-14.5673
ACUUCU	1335	221	605	373	1199	0.567147	1109	0.435541	1614	-30.6217	-14.9537
AACCCU	531	87	255	145	487	0.567142	1110	0.44368	1020	-31.0832	-15.8301
AACGCU	908	156	410	247	813	0.567137	1111	0.421176	2899	-31.0836	-15.635
AUUGCC	1212	221	523	355	1099	0.567124	1112	0.439786	1274	-31.4141	-16.1236
UGCUUA	1966	354	848	546	1748	0.567113	1113	0.450713	654	-31.1782	-15.3396
AAGUAA	1231	219	541	345	1105	0.567112	1114	0.433959	1765	-29.5494	-13.9189
UGCACC	747	123	327	215	665	0.567108	1115	0.44436	981	-32.2777	-16.7166
CUCUUU	2037	358	927	562	1847	0.567101	1116	0.438341	1390	-31.0584	-14.9715
CCGAUA	765	126	343	217	686	0.567091	1117	0.461638	261	-31.0563	-15.7201
CCACAU	569	94	244	157	495	0.56708	1118	0.4376	1448	-30.9541	-15.8988
AUGCUA	1278	215	557	363	1135	0.567074	1119	0.435453	1625	-30.786	-15.5389
AACACA	418	73	182	122	377	0.567069	1120	0.456345	404	-29.6564	-14.4726
AGUCCA	825	144	369	228	741	0.567057	1121	0.424682	2589	-31.2655	-15.7283
CACAAG	563	104	239	171	514	0.567055	1122	0.453418	523	-30.5985	-15.2499
CUAGUU	1956	335	882	536	1753	0.567047	1123	0.448044	766	-31.2047	-15.315
UACCAG	823	135	371	231	737	0.567039	1124	0.420227	2972	-31.4153	-16.351
CCGCUA	771	134	356	207	697	0.567038	1125	0.459121	319	-32.3786	-16.6605
GGUAAA	1693	300	747	477	1524	0.567032	1126	0.434033	1758	-30.6736	-14.7208
UAGACA	919	149	433	236	818	0.567011	1127	0.430879	2041	-30.7967	-15.0457
UCAGAA	958	168	430	262	860	0.567007	1128	0.440076	1262	-30.1653	-14.9137
ACCCUU	738	119	358	189	666	0.566982	1129	0.429662	2161	-31.4267	-15.877
GUCUGA	1827	316	819	502	1637	0.566964	1130	0.433649	1792	-31.8366	-15.8109
AUUAGU	2629	459	1126	755	2340	0.566961	1131	0.450371	667	-30.8192	-14.4494
UCGAAU	1319	249	560	390	1199	0.566941	1132	0.438334	1391	-30.0834	-14.807
CGCAAU	836	154	360	243	757	0.56692	1133	0.442177	1127	-30.5661	-15.1984
GUUAAA	1887	347	811	556	1714	0.566903	1134	0.442649	1090	-29.7232	-14.3337
ACGCUU	1268	214	574	341	1129	0.566898	1135	0.452106	578	-31.2992	-15.7627
ACUGCU	1160	205	527	318	1050	0.566891	1136	0.434993	1666	-31.6449	-16.1369
AGACCC	499	87	217	138	442	0.566884	1137	0.475215	58	-31.9667	-16.674
GAGUUC	1908	327	851	500	1678	0.566884	1138	0.439113	1325	-31.5179	-15.6005
CACUUC	867	146	390	243	779	0.566862	1139	0.452472	557	-31.0167	-15.4958
GUUACC	1163	194	531	318	1043	0.566854	1140	0.408012	3722	-31.6807	-16.0812
AGAUUG	2245	391	959	640	1990	0.566843	1141	0.434174	1740	-30.6344	-14.9903
UAGUCU	2036	357	923	561	1841	0.566786	1142	0.448209	759	-31.0485	-14.9944
AGGGAU	2283	405	992	653	2050	0.566783	1143	0.437749	1433	-31.0002	-15.4588
UAUUGU	3770	686	1590	1081	3357	0.566776	1144	0.449929	684	-30.7349	-14.306
CCACUA	501	88	222	146	456	0.566772	1145	0.444947	952	-31.1531	-15.579
GCGCAU	1216	206	563	337	1106	0.566763	1146	0.435438	1628	-32.0653	-16.5233
CUUAUC	1333	228	606	370	1204	0.56676	1147	0.440908	1214	-30.2207	-14.8829
UGUUAA	2565	472	1084	747	2303	0.566754	1148	0.435998	1567	-30.5352	-14.3668
CAAAUG	1008	183	415	296	894	0.566733	1149	0.43472	1689	-30.2098	-14.8717
AACACC	388	70	181	110	361	0.566719	1150	0.408193	3713	-31.3139	-16.2263
GAUCAU	1392	254	608	384	1246	0.566716	1151	0.431111	2013	-30.6094	-15.1486
UUGAGU	3147	534	1416	852	2802	0.566705	1152	0.438064	1404	-31.2681	-15.0642
AUUAGC	1334	227	592	368	1187	0.566694	1153	0.460672	284	-30.5938	-15.0864
AAUGAG	1601	273	707	437	1417	0.56669	1154	0.416392	3264	-30.3238	-14.9258
UACAGG	1370	248	580	405	1233	0.56668	1155	0.437533	1455	-31.17	-15.8197
UCAGUU	2213	393	992	602	1987	0.56666	1156	0.440864	1219	-30.3512	-14.5108
UCUCAC	851	156	384	226	766	0.566657	1157	0.436023	1566	-31.3498	-15.4474
ACCAUC	563	96	250	154	500	0.566641	1158	0.411802	3544	-30.7463	-15.461
AAUGCC	813	141	365	223	729	0.566638	1159	0.448042	767	-31.5012	-16.3471
CAGUCA	927	166	425	254	845	0.566638	1160	0.421532	2862	-30.8622	-15.2752
UAAGCA	943	169	422	258	849	0.56661	1161	0.432328	1895	-29.8535	-14.7993
AAAGCA	674	128	283	195	606	0.566604	1162	0.440859	1220	-29.4543	-14.4029
UCGAAC	771	130	351	211	692	0.566569	1163	0.449917	685	-30.6398	-15.5224
UCAACG	915	166	402	250	818	0.566566	1164	0.419328	3045	-30.772	-15.1445
GAGUAU	2261	399	975	628	2002	0.566558	1165	0.442469	1104	-31.1739	-15.2728
GCAUUA	1455	267	619	431	1317	0.566557	1166	0.442925	1066	-30.6575	-15.1801
UACUAG	1305	227	566	378	1171	0.566502	1167	0.453472	522	-31.1378	-15.5874
UUAGAC	1265	222	552	342	1116	0.5665	1168	0.457946	351	-31.1987	-15.3397
CUUGAA	1221	222	516	365	1103	0.566479	1169	0.418391	3128	-30.6397	-15.2783
UACUCG	1231	200	565	343	1108	0.566478	1170	0.44714	819	-31.2762	-15.7598
GCUUAC	1170	208	529	313	1050	0.566403	1171	0.434345	1723	-31.5039	-16.0083
GAAUCA	941	165	422	258	845	0.566385	1172	0.458129	345	-30.0069	-14.6977
CCGUAU	1258	220	565	339	1124	0.566374	1173	0.426288	2454	-31.6392	-15.8672
AAUGUA	1727	320	730	484	1534	0.566355	1174	0.435798	1587	-29.9078	-14.4617
AUAUCG	1548	287	682	433	1402	0.566256	1175	0.462255	239	-30.35	-15.2253
AUCUCU	1381	236	629	375	1240	0.566248	1176	0.434175	1738	-30.6624	-14.9572
CCCUUU	1189	203	566	319	1088	0.566245	1177	0.45599	414	-31.9814	-15.7734
AUGAUC	1316	229	572	375	1176	0.566237	1178	0.440151	1257	-30.8566	-15.4061
CGCUAA	802	139	366	215	720	0.566211	1179	0.441578	1165	-31.0489	-15.6481
AGUCUU	2065	366	929	574	1869	0.566205	1180	0.447033	826	-30.6973	-14.8243
UUAUCG	2235	405	966	625	1996	0.566191	1181	0.445565	918	-30.2838	-14.722
UCUUAG	1903	339	817	543	1699	0.566177	1182	0.429814	2143	-31.3057	-15.1909
ACUAAG	946	169	419	270	858	0.566156	1183	0.447517	802	-30.3572	-14.9151
ACCAAC	338	54	160	87	301	0.566143	1184	0.433816	1777	-30.8073	-15.5991
AAGUAU	1841	322	827	492	1641	0.566124	1185	0.438083	1401	-30.3495	-14.2325
GCUUCU	1766	300	825	458	1583	0.566105	1186	0.432505	1882	-31.8842	-16.1946
UAGGAA	1536	260	654	428	1342	0.566097	1187	0.451012	636	-30.4874	-14.8538
AGUAUU	2621	442	1195	701	2338	0.566065	1188	0.448898	727	-30.5343	-14.4701
AUAACG	1019	187	433	304	924	0.566051	1189	0.435215	1645	-30.2603	-14.8096
UACACG	901	150	424	233	807	0.566034	1190	0.425576	2506	-31.0013	-15.6917
GCCCAA	541	97	248	146	491	0.566011	1191	0.404502	3833	-31.8451	-16.4884
UGCCCA	737	130	337	208	675	0.566004	1192	0.420089	2984	-32.4695	-16.6325
CACGUU	1367	241	602	378	1221	0.566	1193	0.426992	2391	-31.0882	-15.3755
AGGACU	1290	224	565	359	1148	0.565975	1194	0.457973	349	-31.4897	-16.2761
GUAUAC	1383	251	617	380	1248	0.565832	1195	0.435845	1582	-30.7946	-15.2715
ACAGUU	1584	310	650	480	1440	0.565823	1196	0.435353	1633	-30.4821	-14.9042
AGAGCU	1210	209	555	338	1102	0.565804	1197	0.432077	1922	-31.3698	-16.2601
CCCUAU	722	119	335	206	660	0.565795	1198	0.451466	611	-31.3796	-15.5994
AACAUC	634	114	275	178	567	0.565784	1199	0.429381	2188	-29.58	-14.5395
ACGGAU	1305	224	604	343	1171	0.56577	1200	0.424822	2571	-31.1718	-15.7309
UAACCU	824	138	367	221	726	0.565763	1201	0.432574	1875	-30.3937	-15.2528
GACUCA	841	149	378	223	750	0.56576	1202	0.454312	484	-31.1206	-15.6399
ACCAAA	404	69	175	118	362	0.565725	1203	0.430996	2031	-29.7702	-14.9469
UGCAUA	1436	248	619	391	1258	0.565725	1204	0.430295	2099	-30.9848	-15.7641
AAGUUU	2642	466	1146	760	2372	0.565691	1205	0.44394	1003	-30.0927	-13.9757
CAAGUC	921	177	392	260	829	0.565681	1206	0.433491	1799	-30.9415	-15.4696
GAAAAU	1227	213	550	334	1097	0.565679	1207	0.425468	2515	-29.6393	-14.1985
UAGAGA	1422	247	600	389	1236	0.565662	1208	0.446658	854	-30.5239	-15.1479
CAGGAC	857	164	357	252	773	0.565645	1209	0.419572	3023	-31.8983	-16.9043
CCAAUU	907	152	411	242	805	0.565639	1210	0.41915	3060	-30.2004	-14.8359
AUCCUG	1125	195	501	300	996	0.565636	1211	0.427836	2323	-32.2728	-16.505
AUUUGC	2036	368	884	583	1835	0.565632	1212	0.421348	2880	-31.3062	-15.2242
CGAAUU	1378	268	623	404	1295	0.565615	1213	0.438801	1346	-30.2128	-14.8106
UAACAG	1046	185	454	304	943	0.565589	1214	0.43788	1419	-30.2159	-14.8063
UCCCGA	735	114	354	184	652	0.565573	1215	0.435945	1574	-32.1692	-16.2443
GCGUAA	1305	221	577	355	1153	0.56557	1216	0.436143	1556	-31.491	-15.5598
UUUUGU	5393	957	2370	1503	4830	0.565563	1217	0.444657	964	-31.0431	-14.1101
CACACA	389	66	176	102	344	0.565562	1218	0.431526	1978	-30.4675	-15.2486
GUUUCA	2346	407	1058	642	2107	0.565559	1219	0.431938	1933	-30.5437	-14.5928
CACCAU	560	107	232	169	508	0.565552	1220	0.442884	1068	-30.7285	-15.4543
UUCUCU	1908	338	839	523	1700	0.565513	1221	0.431172	2005	-30.6405	-14.6702
CUAUAG	1309	238	588	366	1192	0.565509	1222	0.460682	283	-31.3081	-15.1107
AUCCCU	787	136	353	221	710	0.565491	1223	0.428895	2228	-31.8805	-15.8588
GACAUC	860	144	388	239	771	0.565491	1224	0.43978	1276	-31.4382	-15.9993
ACUAGA	905	171	382	264	817	0.56549	1225	0.455748	422	-30.8889	-15.7698
CAAAAC	436	68	198	119	385	0.565487	1226	0.399023	3963	-29.7207	-14.6775
AAAUGU	1928	361	836	546	1743	0.565479	1227	0.436874	1497	-30.0791	-14.1315
GAUAAA	1196	208	515	338	1061	0.565423	1228	0.423048	2719	-29.4449	-13.9948
CACGAA	534	102	229	165	496	0.565416	1229	0.425972	2478	-30.5913	-15.4537
CAUUAG	1372	252	599	402	1253	0.565415	1230	0.426121	2466	-30.971	-15.2415
AGCAUU	1389	254	600	393	1247	0.565398	1231	0.445112	943	-30.3621	-15.039
GACAGU	1377	265	572	413	1250	0.565378	1232	0.435413	1629	-31.5814	-15.6793
ACUUUC	1334	233	615	364	1212	0.565365	1233	0.442471	1103	-30.2796	-14.7146
AGUCAG	1386	234	629	369	1232	0.565365	1234	0.437106	1486	-31.3206	-15.6752
ACCCUA	478	80	225	132	437	0.565363	1235	0.457072	371	-31.2665	-16.0824
UAACAU	1099	205	462	313	980	0.565361	1236	0.424957	2562	-29.5316	-14.3141
CCGUCA	916	151	428	248	827	0.565334	1237	0.437878	1420	-31.9886	-16.3259
UCCUGA	1055	191	460	308	959	0.565329	1238	0.435571	1606	-31.6123	-15.9283
ACGAGA	817	157	351	227	735	0.565325	1239	0.440451	1237	-30.6149	-15.3427
UUAAGA	1686	304	723	465	1492	0.565263	1240	0.4522	572	-29.9	-14.2604
AAUCUG	1490	267	655	423	1345	0.565258	1241	0.437724	1437	-30.7249	-14.8671
GGAAUC	1326	234	596	355	1185	0.565258	1242	0.448858	728	-31.353	-15.6731
AUUGAG	2133	369	929	597	1895	0.565178	1243	0.45472	462	-30.5729	-14.9871
CGAAAC	583	111	240	170	521	0.565158	1244	0.472863	76	-30.9752	-15.4845
AGAUCA	936	173	397	264	834	0.565156	1245	0.439559	1298	-30.1706	-15.0459
CGUAUU	2153	398	911	615	1924	0.565135	1246	0.432105	1916	-31.0061	-15.0963
AAGUAC	967	153	451	242	846	0.565131	1247	0.433444	1805	-31.058	-15.4577
CUUAAG	1436	265	611	402	1278	0.565125	1248	0.452446	559	-30.6116	-15.0964
CUCCAA	527	95	245	141	481	0.565106	1249	0.431185	2004	-30.8934	-14.944
AUAUGG	2429	431	1083	669	2183	0.565104	1250	0.446795	838	-31.2837	-15.617
CCGAAA	519	91	212	155	458	0.565097	1251	0.489212	6	-30.9233	-15.4162
ACUUCA	904	157	408	248	813	0.565092	1252	0.440375	1244	-30.1241	-14.505
ACCUCU	817	148	380	219	747	0.565086	1253	0.448527	741	-31.7884	-16.1845
CUAGAG	1218	211	538	337	1086	0.565083	1254	0.425397	2521	-31.9956	-16.647
UACGGA	1244	226	547	338	1111	0.565077	1255	0.438592	1362	-31.1056	-15.708
CCAGUU	1214	213	551	322	1086	0.565052	1256	0.413575	3434	-31.2179	-15.5539
ACCAAU	597	102	264	156	522	0.565009	1257	0.435713	1598	-29.9255	-15.0477
CAAUUC	968	172	434	271	877	0.564997	1258	0.445359	925	-29.9267	-14.614
UAAGAG	1538	267	689	418	1374	0.564963	1259	0.436759	1508	-30.5644	-14.8349
CGCAAC	569	105	248	149	502	0.564956	1260	0.426193	2464	-31.283	-15.8592
GAAAAG	1107	195	473	305	973	0.564945	1261	0.419589	3022	-29.9812	-14.3814
GCAUCU	1281	218	592	342	1152	0.564921	1262	0.426983	2392	-31.5254	-16.0562
CCUGAU	1133	208	496	335	1039	0.56489	1263	0.444533	970	-31.7909	-16.2804
CAUCCA	573	99	246	155	500	0.564834	1264	0.452936	541	-30.8292	-15.383
GUGAAU	2057	379	883	596	1858	0.564797	1265	0.468217	142	-31.2765	-15.2069
AUCGGA	1352	228	613	362	1203	0.564794	1266	0.440587	1231	-31.1427	-15.6818
UCACUC	862	145	407	219	771	0.564748	1267	0.425687	2496	-31.0122	-15.2274
CACGAC	556	80	272	142	494	0.56474	1268	0.442077	1136	-31.4617	-16.3683
AUCACA	601	108	260	173	541	0.564713	1269	0.450847	647	-29.5777	-14.4952
UUACAG	1368	244	589	384	1217	0.564706	1270	0.452923	542	-30.3494	-14.7967
ACUUGC	1197	219	478	351	1048	0.564697	1271	0.445396	924	-31.383	-15.6775
ACUUGU	2060	354	937	557	1848	0.564691	1272	0.444929	953	-31.1349	-15.1184
GCAAUU	1489	261	688	397	1346	0.564658	1273	0.426958	2397	-30.6075	-14.9652
UUUUGG	5281	915	2387	1455	4757	0.564635	1274	0.437467	1460	-31.6488	-15.1667
ACAAUG	922	172	381	270	823	0.564532	1275	0.436477	1535	-30.4479	-14.8506
AAGAAU	1122	184	522	290	996	0.564529	1276	0.456458	397	-29.6337	-14.3509
CCAACU	503	85	246	127	458	0.564526	1277	0.46827	140	-31.0013	-15.5231
UAUUUG	3835	683	1690	1056	3429	0.564499	1278	0.42962	2164	-31.1694	-14.5034
AACAGC	583	98	255	169	522	0.564498	1279	0.453977	499	-30.7863	-15.4581
ACAAAC	440	85	177	131	393	0.564458	1280	0.409745	3647	-30.2467	-14.9622
GUCAAC	917	164	411	259	834	0.564437	1281	0.419237	3053	-31.029	-15.4002
AACGGA	908	167	410	244	821	0.564428	1282	0.431548	1976	-30.717	-15.4584
AGUUCU	2009	372	857	562	1791	0.564425	1283	0.445887	900	-31.0106	-14.9059
GCAACU	841	153	372	227	752	0.564419	1284	0.434222	1737	-31.0529	-15.5548
ACUCUA	865	164	370	239	773	0.564405	1285	0.456494	395	-30.8931	-15.2791
CCAAGG	829	150	369	228	747	0.564401	1286	0.4391	1328	-32.1697	-16.374
UAUGUA	2521	452	1074	727	2253	0.564382	1287	0.4304	2091	-30.7349	-14.6489
GUUACA	1364	244	599	381	1224	0.564371	1288	0.446647	857	-30.4998	-14.862
ACACUC	600	95	289	149	533	0.564366	1289	0.444808	959	-30.8341	-15.5012
AAAAUG	1298	217	583	357	1157	0.56433	1290	0.434893	1676	-29.5679	-14.1275
UAGCUA	1204	214	504	346	1064	0.564288	1291	0.439516	1302	-30.2867	-15.3605
GUCACA	909	158	404	245	807	0.564278	1292	0.433085	1836	-31.2389	-15.7795
CAAGAA	603	99	279	158	536	0.56423	1293	0.47114	97	-30.2604	-15.0058
AGUUCA	1517	263	691	391	1345	0.564155	1294	0.443341	1040	-30.4136	-14.7375
CAUCUA	877	147	401	235	783	0.564152	1295	0.43264	1870	-30.6718	-15.3398
AAAAGC	726	125	320	204	649	0.564151	1296	0.416505	3259	-29.8183	-14.5127
AUUCGU	2164	375	974	601	1950	0.56406	1297	0.429674	2157	-30.8446	-14.9133
UGAUCA	1278	211	598	330	1139	0.564059	1298	0.4304	2092	-30.4448	-15.1745
AUCCGG	1381	249	630	383	1262	0.564017	1299	0.453908	501	-32.2449	-16.6096
CCAAGU	789	136	337	228	701	0.564009	1300	0.432002	1926	-31.6766	-15.8701
CCAUUC	845	151	383	229	763	0.564007	1301	0.433363	1812	-31.1358	-15.5477
AACCGU	889	161	403	240	804	0.563961	1302	0.418578	3104	-31.3818	-15.8109
UGAGAU	1976	358	834	568	1760	0.563947	1303	0.451796	597	-30.5988	-15.1442
AACCGA	571	92	275	150	517	0.563946	1304	0.423351	2687	-30.9274	-15.727
CCUUUA	1229	207	569	329	1105	0.563931	1305	0.449669	691	-31.3393	-15.6223
UCUUUG	3137	536	1466	843	2845	0.563923	1306	0.452417	563	-31.4598	-15.0847
CGCUAC	745	130	336	203	669	0.56392	1307	0.422993	2725	-31.7778	-16.507
AGACGA	799	143	340	225	708	0.563917	1308	0.445851	904	-30.6187	-15.3059
UAAUGC	1376	244	595	382	1221	0.563877	1309	0.443068	1052	-30.5959	-15.0194
UGCUAU	1995	364	892	562	1818	0.563863	1310	0.424207	2619	-31.385	-15.4755
CUAGAC	731	130	319	201	650	0.563853	1311	0.447203	814	-32.0088	-16.6274
GGACUU	1919	337	856	531	1724	0.563806	1312	0.429275	2199	-31.6263	-16.1227
CAACGA	545	99	236	150	485	0.5638	1313	0.418879	3078	-30.1818	-14.6673
CUUCCA	773	134	348	209	691	0.563787	1314	0.465254	183	-30.9246	-15.2911
GUAUUU	3877	701	1709	1073	3483	0.563774	1315	0.436818	1500	-31.0756	-14.4322
CUAUGG	1896	327	838	524	1689	0.563767	1316	0.453698	511	-32.3959	-16.2976
AGUUGA	2067	379	887	587	1853	0.563749	1317	0.43243	1885	-30.5763	-14.8956
GAUUGA	2030	353	862	563	1778	0.563728	1318	0.420212	2973	-30.331	-15.0871
CAUCGU	1379	245	618	379	1242	0.563711	1319	0.414274	3393	-31.3006	-15.4234
CGGAAA	963	172	411	283	866	0.563697	1320	0.459996	300	-30.5831	-15.2232
UCAGAC	787	143	357	214	714	0.563665	1321	0.43704	1488	-30.9699	-15.5798
CAACGC	573	94	267	147	508	0.563662	1322	0.423086	2718	-31.5327	-16.0221
CCCUAA	471	81	219	122	422	0.563661	1323	0.434331	1724	-31.5067	-16.1547
AACUAA	671	116	302	181	599	0.563621	1324	0.438379	1383	-29.3688	-14.1143
UCAGAG	1322	234	569	365	1168	0.563607	1325	0.441435	1177	-31.0225	-15.3784
CUUGGA	1843	314	855	499	1668	0.563604	1326	0.424047	2638	-32.0674	-16.3244
CCUAAC	499	89	221	139	449	0.563591	1327	0.434491	1709	-30.9486	-15.8952
CGAUUA	1312	231	597	355	1183	0.56359	1328	0.448102	763	-30.1428	-14.8571
UUUCGU	3400	626	1476	974	3076	0.563586	1329	0.451813	594	-31.1544	-14.6572
GCUUCA	1271	234	568	359	1161	0.563579	1330	0.451188	628	-31.3956	-15.7688
GUCAGA	1330	219	607	363	1189	0.56356	1331	0.438172	1397	-31.3032	-15.6213
CAUCAC	591	109	255	171	535	0.563554	1332	0.43454	1705	-30.6138	-15.3321
GACCUA	761	128	356	192	676	0.563514	1333	0.447962	772	-31.1091	-16.1847
UCAUCG	1405	236	628	392	1256	0.563494	1334	0.427004	2390	-31.1828	-15.4363
AUAGGU	2553	458	1122	703	2283	0.563485	1335	0.431093	2016	-30.8934	-15.2416
AGAACA	564	105	245	159	509	0.56348	1336	0.408363	3704	-30.7095	-16.0467
GUACUC	1227	209	560	332	1101	0.563475	1337	0.419786	3007	-31.5666	-16.122
UAAGGU	2524	446	1113	688	2247	0.563469	1338	0.425506	2511	-30.6529	-14.6374
UACUAC	746	132	336	208	676	0.563458	1339	0.444438	976	-30.1235	-14.9721
UCCGAG	1173	192	524	310	1026	0.563451	1340	0.434104	1749	-32.2614	-16.3603
AGUCGA	1186	209	522	325	1056	0.563438	1341	0.446768	842	-30.779	-15.3186
GAACCU	770	136	342	215	693	0.563432	1342	0.446247	881	-31.6841	-16.1606
UUUUAG	3792	683	1631	1058	3372	0.563399	1343	0.444897	956	-30.8104	-14.5816
UAACGC	853	150	386	231	767	0.563382	1344	0.407026	3755	-30.8213	-15.5091
UUGCCA	1160	196	531	314	1041	0.563331	1345	0.422385	2788	-31.5436	-15.8736
CUAGGA	1243	203	582	317	1102	0.563312	1346	0.435744	1595	-31.6958	-16.6359
CACGCU	886	148	412	236	796	0.563301	1347	0.428206	2287	-31.7183	-16.4486
CUGAGA	1103	208	470	318	996	0.563297	1348	0.435123	1656	-31.2187	-16.0671
UAUUGG	3569	633	1597	983	3213	0.563221	1349	0.436943	1492	-31.0965	-15.1484
ACCAGU	862	150	383	247	780	0.563218	1350	0.40063	3937	-31.1775	-15.9261
UGAUAC	1256	232	539	347	1118	0.563193	1351	0.44512	942	-30.5682	-15.2889
CGUAAG	1310	219	579	370	1168	0.563166	1352	0.424862	2568	-31.3966	-15.6251
UAAUGU	2539	468	1099	721	2288	0.563162	1353	0.445583	915	-30.3242	-14.2575
GACAAC	560	87	272	144	503	0.563161	1354	0.423623	2666	-30.707	-15.5128
UUCGUA	2090	384	907	589	1880	0.563147	1355	0.445519	920	-30.8938	-14.9393
UUUCGC	1942	336	893	530	1759	0.56312	1356	0.428983	2221	-31.5626	-15.6118
UAUGAC	1284	222	584	353	1159	0.563113	1357	0.417895	3163	-30.912	-15.5012
UCCAGA	800	142	349	228	719	0.563109	1358	0.422805	2746	-31.2269	-15.8735
CAACCU	529	109	208	158	475	0.563093	1359	0.451421	616	-31.1102	-15.8772
CAUGAA	932	169	410	265	844	0.563079	1360	0.435198	1649	-30.9902	-15.6758
AUCCAC	571	100	262	153	515	0.563074	1361	0.451427	615	-31.4706	-15.5834
CAGUUC	1303	233	588	355	1176	0.563065	1362	0.426083	2469	-30.9576	-15.2752
GCAAAG	923	172	398	269	839	0.563061	1363	0.403957	3851	-30.9713	-15.5445
AACGAG	954	164	434	256	854	0.563028	1364	0.438539	1370	-30.4343	-15.1185
UAUCCU	1285	232	570	343	1145	0.563019	1365	0.429005	2219	-30.8297	-15.317
CAAAAG	712	124	317	196	637	0.562977	1366	0.424241	2616	-30.1904	-14.6275
UGACUU	1991	350	950	535	1835	0.562975	1367	0.439648	1289	-30.9348	-15.1939
UCGUAU	2048	374	873	580	1827	0.562946	1368	0.435543	1611	-30.8163	-14.8798
ACACGA	576	87	274	149	510	0.562942	1369	0.401202	3924	-30.5813	-15.5773
AUCAUG	1464	259	662	388	1309	0.562927	1370	0.437546	1454	-30.6221	-15.3378
CCAUCA	574	105	257	157	519	0.5629	1371	0.413238	3455	-30.9075	-15.5421
GUAUAU	2664	483	1144	759	2386	0.562871	1372	0.441335	1188	-31.0232	-15.1157
UCAGGA	1297	227	589	349	1165	0.562842	1373	0.430351	2094	-31.2032	-15.7488
UGUCAU	2157	387	946	589	1922	0.562823	1374	0.446195	886	-31.1911	-15.0245
UAAGGG	2469	428	1084	684	2196	0.562793	1375	0.453104	535	-31.0402	-15.3524
ACCGAG	792	130	379	210	719	0.562792	1376	0.436474	1536	-31.9236	-16.5708
CUAUGA	1283	231	569	357	1157	0.562777	1377	0.443778	1015	-31.1463	-15.75
GACGUC	1215	204	574	318	1096	0.562774	1378	0.417064	3212	-32.5748	-16.7938
UACGAU	1258	241	535	346	1122	0.562743	1379	0.462102	246	-30.1364	-14.986
GGCAUA	1399	242	630	374	1246	0.562742	1380	0.437789	1428	-31.6075	-16.263
GAACAA	592	104	274	159	537	0.562741	1381	0.460462	293	-30.0121	-15.1551
UGUUCA	2122	403	889	608	1900	0.562723	1382	0.43397	1764	-30.9763	-14.8258
UACCCC	518	90	233	138	461	0.562699	1383	0.446428	869	-32.1794	-16.4928
UUCGAU	1914	345	876	535	1756	0.562669	1384	0.443639	1022	-30.3019	-14.7984
UUGACG	1789	346	757	510	1613	0.562648	1385	0.431704	1958	-31.6751	-15.8207
AUACGA	874	166	381	246	793	0.562647	1386	0.45152	608	-29.8783	-14.9142
AAUUGG	2488	460	1049	704	2213	0.562642	1387	0.431856	1942	-30.642	-14.8835
ACUCUU	1271	237	547	358	1142	0.56261	1388	0.439618	1293	-30.7172	-15.0943
ACAGGA	982	182	427	273	882	0.562596	1389	0.420377	2964	-31.2085	-16.0316
UCAGUA	1415	249	633	380	1262	0.562544	1390	0.439761	1279	-30.6592	-14.9941
UUGAGC	1765	329	742	495	1566	0.562489	1391	0.441825	1148	-31.5269	-16.1501
AAGGUU	2520	434	1144	693	2271	0.562457	1392	0.43024	2103	-30.519	-14.592
GUCUUU	3222	559	1454	858	2871	0.562436	1393	0.434946	1671	-31.3964	-14.927
ACACAG	620	106	285	153	544	0.56241	1394	0.431367	1990	-30.4843	-15.5104
CAAGGA	965	171	443	275	889	0.562403	1395	0.446569	863	-30.9662	-15.6679
AGACAC	576	103	243	163	509	0.56237	1396	0.454066	493	-30.6873	-15.4862
ACUCCA	547	86	253	135	474	0.562352	1397	0.40897	3682	-30.9063	-15.64
UUCCGU	1931	322	917	502	1741	0.562348	1398	0.423579	2670	-31.8296	-15.4346
UCUGUU	3034	525	1373	802	2700	0.562308	1399	0.434614	1693	-31.5606	-15.0146
CUAACC	496	93	226	131	450	0.562279	1400	0.42135	2879	-31.0219	-15.8293
GAGAGC	1120	193	528	300	1021	0.562275	1401	0.42825	2284	-31.7211	-16.6908
GAGUUG	2908	521	1280	801	2602	0.562265	1402	0.432871	1852	-31.7493	-15.7997
UCACAG	852	147	399	215	761	0.562265	1403	0.415568	3322	-30.7784	-15.4226
AGCGUA	1313	211	604	349	1164	0.562256	1404	0.442155	1129	-31.3761	-16.0768
CUAGAU	1276	248	532	372	1152	0.562255	1405	0.436673	1518	-31.175	-15.9247
CAAAGC	590	107	271	156	534	0.562254	1406	0.438098	1400	-30.5523	-15.3504
ACUCAC	616	98	307	156	561	0.562233	1407	0.432938	1844	-30.9568	-15.511
CUCGUA	1304	233	575	386	1194	0.562213	1408	0.439346	1312	-31.9328	-15.886
AUGACA	880	145	416	236	797	0.562191	1409	0.433131	1831	-30.5355	-15.1346
CCACAG	559	93	264	142	499	0.562186	1410	0.457811	355	-32.0147	-16.4182
UUCAGC	1284	225	591	351	1167	0.562156	1411	0.437933	1414	-31.1701	-15.5858
CAGACU	776	135	355	203	693	0.562106	1412	0.440244	1253	-31.4558	-16.0105
CGAAAG	905	149	399	251	799	0.562072	1413	0.43743	1465	-30.9012	-15.4526
GACCAU	792	146	337	219	702	0.562057	1414	0.431863	1940	-31.2805	-15.9478
UUGGCU	2874	531	1259	810	2600	0.562055	1415	0.416702	3240	-32.0187	-15.9724
ACUUCC	797	138	362	215	715	0.562017	1416	0.440659	1227	-31.6691	-15.84
GAACUG	1232	205	571	320	1096	0.562015	1417	0.456049	413	-31.3559	-16.0986
AGCAUA	998	186	418	279	883	0.561997	1418	0.419791	3006	-30.7376	-15.7716
UUCAAG	1437	244	666	390	1300	0.561992	1419	0.44696	830	-30.2592	-14.5772
GAUUUG	3239	611	1384	925	2920	0.561973	1420	0.43861	1360	-31.1949	-15.0832
AUCGCC	846	141	402	222	765	0.561972	1421	0.420159	2981	-32.3808	-16.7479
AGAAGU	1542	277	684	427	1388	0.56197	1422	0.465967	173	-31.2976	-14.8266
GAUAGC	1225	210	550	331	1091	0.561966	1423	0.436809	1501	-31.2061	-15.9848
UUUGAC	1913	339	862	513	1714	0.561963	1424	0.439776	1277	-31.0218	-15.1698
ACGACU	818	144	371	209	724	0.561958	1425	0.422992	2726	-30.8647	-15.854
UACUGA	1181	202	536	315	1053	0.561952	1426	0.4312	2003	-30.5515	-15.4039
CGGAUU	1974	341	892	530	1763	0.561949	1427	0.435184	1651	-31.3473	-15.6814
UGCAAC	794	137	383	211	731	0.561907	1428	0.418364	3132	-31.0565	-15.5235
GAAAGC	878	166	400	234	800	0.561894	1429	0.438028	1407	-30.9472	-15.615
UUAUGG	3418	590	1542	930	3062	0.561893	1430	0.438067	1403	-31.3352	-15.2069
ACAUCC	607	107	281	164	552	0.561886	1431	0.444397	979	-31.6114	-16.1923
CGAACU	787	131	361	212	704	0.561858	1432	0.450108	676	-30.8741	-15.6978
AAAUGG	1739	315	754	483	1552	0.561847	1433	0.436109	1562	-30.4221	-14.7947
CACGUC	940	167	425	260	852	0.561831	1434	0.422352	2793	-31.8359	-16.2178
GAUCUA	1221	227	526	339	1092	0.561825	1435	0.464673	190	-31.1794	-15.4137
ACUUGG	2098	382	948	574	1904	0.561802	1436	0.426973	2394	-31.8842	-15.8991
ACGUUA	1403	261	617	385	1263	0.561801	1437	0.420015	2990	-30.6077	-15.3222
AGACCU	749	128	352	191	671	0.561791	1438	0.452436	561	-31.4974	-16.3111
AUCGUU	2245	425	981	617	2023	0.561778	1439	0.422841	2739	-30.6259	-14.8025
UCAACU	906	182	381	264	827	0.561759	1440	0.442786	1078	-30.3313	-14.6543
GACAAA	687	129	297	184	610	0.561752	1441	0.43034	2095	-30.1676	-14.8337
GAUUCC	1177	193	572	293	1058	0.561748	1442	0.434111	1747	-31.5082	-15.7881
CCUUUC	1248	225	565	336	1126	0.561737	1443	0.434048	1757	-31.6142	-15.8233
GUUACG	1972	378	837	570	1785	0.561737	1444	0.433467	1803	-31.3043	-15.5808
UGCUAA	1172	218	528	320	1066	0.561737	1445	0.439079	1331	-30.7276	-15.1773
GAAACU	939	172	402	256	830	0.561736	1446	0.46973	113	-30.5789	-15.1178
UUCUGU	2930	524	1320	799	2643	0.561704	1447	0.435562	1608	-31.5713	-14.9723
CCAAGA	539	92	232	144	468	0.561698	1448	0.448423	747	-30.8816	-15.642
AGUAAU	1730	306	751	473	1530	0.561695	1449	0.451494	609	-30.1128	-14.2208
AAUCGU	1526	267	676	404	1347	0.561675	1450	0.422861	2737	-30.5066	-14.5961
GAAUGA	1355	245	585	369	1199	0.561666	1451	0.429485	2180	-30.2928	-15.1677
UAAGAA	1078	186	486	296	968	0.561649	1452	0.444485	972	-29.8128	-14.3164
CGGUUU	3346	603	1510	910	3023	0.561628	1453	0.439752	1281	-31.9542	-15.5627
CGAGUU	1885	338	830	522	1690	0.561627	1454	0.452324	569	-31.4564	-15.6942
GAUCUU	1963	361	855	532	1748	0.561615	1455	0.451862	591	-30.726	-15.1071
UAUUCG	2270	410	1008	619	2037	0.561603	1456	0.432809	1856	-30.5803	-14.7684
AAGGAU	1702	317	752	470	1539	0.561581	1457	0.430843	2044	-30.3466	-14.7154
UUCAGU	2200	412	981	600	1993	0.561572	1458	0.442372	1113	-30.8873	-14.7567
UGUUUU	5618	1003	2476	1542	5021	0.561569	1459	0.43062	2061	-31.0966	-14.1889
AGAUGA	1411	243	626	390	1259	0.561552	1460	0.442942	1065	-30.3233	-15.1868
UAGGUU	3657	665	1622	975	3262	0.561513	1461	0.436413	1541	-31.061	-14.9739
UACGAG	1126	207	511	312	1030	0.561449	1462	0.433581	1795	-31.1187	-15.7526
GCUACC	727	125	341	197	663	0.56143	1463	0.415243	3336	-32.3884	-16.9711
UAGACU	1256	226	537	349	1112	0.561427	1464	0.438346	1388	-31.0435	-15.333
GAAUGC	1245	222	560	337	1119	0.561407	1465	0.441603	1162	-31.3597	-15.893
GUAUCC	1259	241	542	355	1138	0.561402	1466	0.456733	385	-31.4921	-15.8814
GCUUAA	1414	257	598	381	1236	0.561382	1467	0.467422	156	-30.7352	-15.2306
CACCCA	338	62	149	86	297	0.561376	1468	0.425936	2481	-31.3354	-16.1971
GAGCUA	1276	235	573	347	1155	0.561326	1469	0.465565	179	-31.5242	-16.3449
ACGUCA	959	159	447	248	854	0.561325	1470	0.410904	3586	-30.8288	-15.4243
AUGGUU	3605	642	1572	1011	3225	0.561315	1471	0.435921	1576	-31.2072	-15.3961
CGUCCA	838	132	419	216	767	0.56131	1472	0.409162	3674	-32.4298	-16.5552
UGACGA	1108	209	476	296	981	0.561293	1473	0.423303	2695	-30.913	-15.6443
GUUCUU	2978	538	1329	799	2666	0.561292	1474	0.438897	1342	-31.1437	-14.6484
UCGGAA	1365	229	620	366	1215	0.561278	1475	0.45261	554	-30.8439	-15.3804
UGUAUA	2500	440	1100	674	2214	0.561278	1476	0.431694	1959	-30.9301	-14.6186
UUCUCG	2119	380	960	563	1903	0.561264	1477	0.424097	2630	-31.6985	-15.4815
GGAAAA	1154	207	511	319	1037	0.561257	1478	0.441829	1147	-30.0144	-14.4051
UUUGGA	3291	599	1420	908	2927	0.561208	1479	0.42489	2566	-31.5408	-15.3302
AAUGAA	1108	199	473	308	980	0.561199	1480	0.436885	1495	-29.4409	-14.3613
AAAGCG	1017	189	469	274	932	0.561187	1481	0.405848	3790	-31.1271	-15.3634
UAGAGG	2067	384	898	578	1860	0.56115	1482	0.424118	2627	-32.0422	-15.8428
CAAGUU	1428	240	668	374	1282	0.561134	1483	0.424399	2602	-30.3443	-14.7574
AUUCAG	1569	283	715	424	1422	0.561111	1484	0.432833	1855	-30.2133	-14.7509
GUAAGA	1510	258	687	416	1361	0.561109	1485	0.43836	1385	-30.5602	-14.8067
GAAAUG	1506	273	640	407	1320	0.561102	1486	0.444082	993	-30.322	-14.7318
AUCUAG	1363	256	589	390	1235	0.561062	1487	0.446733	846	-30.9963	-15.7604
AUCGUC	1360	248	619	366	1233	0.561047	1488	0.418557	3106	-31.3901	-15.5285
AUAGGC	1375	251	606	401	1258	0.561032	1489	0.431953	1929	-31.4216	-15.8299
AGAGCC	785	141	353	214	708	0.561025	1490	0.445295	929	-32.1231	-16.9478
GGAUAA	1645	316	701	457	1474	0.561022	1491	0.448729	733	-30.3342	-14.8784
UACGCU	1215	212	555	337	1104	0.561018	1492	0.443866	1009	-31.3064	-15.791
CAGAAG	908	151	426	237	814	0.561008	1493	0.42067	2938	-31.1376	-15.5043
UUCCUC	1231	232	527	361	1120	0.560996	1494	0.439783	1275	-31.5624	-15.4178
CGUUGA	1752	329	744	507	1580	0.560975	1495	0.433599	1794	-31.4961	-15.6363
CAUGUU	2228	413	993	617	2023	0.560955	1496	0.438988	1336	-31.2072	-15.1055
AUACCA	539	94	233	153	480	0.56095	1497	0.438525	1372	-30.3465	-15.9201
UGCUCU	1737	309	766	486	1561	0.560935	1498	0.442579	1095	-32.2156	-16.198
AUGUAA	1760	320	767	474	1561	0.560906	1499	0.41154	3554	-29.9348	-14.4076
CGCUCA	805	130	395	201	726	0.560902	1500	0.43836	1386	-31.8352	-16.4838
AUUUGG	3516	651	1538	965	3154	0.560863	1501	0.429928	2133	-31.3015	-16.07
GUUGAU	3029	579	1292	856	2727	0.560841	1502	0.448966	720	-31.1654	-15.1144
CAAGAG	927	170	420	239	829	0.560823	1503	0.440405	1241	-30.8818	-15.56
GCAUAG	1379	243	608	376	1227	0.560798	1504	0.417209	3200	-31.4396	-16.051
GUUGAC	1731	323	765	490	1578	0.56079	1505	0.432241	1901	-31.5156	-15.8324
AAUCGC	946	174	428	257	859	0.560774	1506	0.438289	1393	-31.0621	-15.652
GGUUAC	2023	373	866	563	1802	0.560768	1507	0.427105	2385	-31.4729	-15.7005
CGCUGA	1065	175	501	272	948	0.560756	1508	0.430562	2067	-31.8617	-16.5409
AUGUUU	3954	745	1746	1105	3596	0.56075	1509	0.431091	2017	-30.775	-14.394
GAGAGA	1213	231	512	351	1094	0.560729	1510	0.42208	2817	-30.7371	-15.3666
AGUUCC	1183	202	549	303	1054	0.560715	1511	0.446491	867	-31.4951	-15.6128
CUACCG	728	134	336	201	671	0.560692	1512	0.433559	1796	-31.99	-16.7866
CGUUAA	1504	284	644	422	1350	0.560681	1513	0.430462	2081	-30.3158	-14.7124
GACCGA	727	114	349	181	644	0.560669	1514	0.418875	3079	-32.0906	-16.7846
GCGAAA	866	154	380	243	777	0.560621	1515	0.429948	2130	-31.0825	-15.5188
GGCUAU	1993	369	879	558	1806	0.560593	1516	0.433752	1782	-31.7362	-16.0809
UAAGUU	2575	480	1127	706	2313	0.560585	1517	0.432436	1884	-30.04	-14.1503
UCUAUC	1272	237	562	352	1151	0.560569	1518	0.425337	2530	-30.5945	-14.9427
ACGUCU	1415	242	673	371	1286	0.560565	1519	0.427806	2327	-31.7435	-15.9989
UACCUU	1228	224	538	318	1080	0.560514	1520	0.435834	1583	-31.3109	-15.6237
UGAGUA	2137	375	911	588	1874	0.560469	1521	0.428068	2298	-31.1797	-15.1596
UUUGUA	3665	683	1606	1021	3310	0.560458	1522	0.438765	1349	-30.7669	-14.3396
UUUCCG	1915	336	882	494	1712	0.560385	1523	0.439565	1296	-31.5705	-15.3364
GUAGAC	1174	213	523	317	1053	0.560378	1524	0.439894	1272	-31.489	-15.6346
AAGUCU	1482	270	675	410	1355	0.560356	1525	0.435192	1650	-30.6168	-14.7893
GUUACU	2008	374	856	569	1799	0.560356	1526	0.452679	550	-30.5908	-14.8564
CAAGCA	561	103	239	162	504	0.56034	1527	0.469033	123	-30.4175	-15.3524
GUUCAA	1543	272	704	408	1384	0.56034	1528	0.440177	1255	-30.5011	-14.5002
GAGGAC	1171	220	500	333	1053	0.560333	1529	0.469481	116	-31.89	-16.6492
UAAGCU	1321	235	563	357	1155	0.560318	1530	0.427977	2306	-30.5289	-15.0499
UUCCGA	1171	197	543	310	1050	0.560303	1531	0.455197	448	-31.2893	-15.4567
GGAUAC	1247	227	565	325	1117	0.560289	1532	0.443277	1044	-31.2773	-16.1034
UACCGC	788	130	374	201	705	0.560286	1533	0.418067	3152	-32.2616	-16.7741
ACCCGA	504	90	237	134	461	0.560285	1534	0.461778	257	-32.0278	-16.5187
AAUGCA	1014	180	442	277	899	0.560281	1535	0.421696	2848	-29.7696	-14.6853
CAGACG	801	149	368	216	733	0.560273	1536	0.412221	3523	-31.6851	-16.373
UUAGAG	2190	405	942	614	1961	0.560217	1537	0.432378	1892	-31.2982	-15.4813
CUUUAG	2048	379	944	564	1887	0.560216	1538	0.454997	456	-31.4807	-15.316
UCGUUC	2018	356	913	543	1812	0.560173	1539	0.434383	1720	-31.5569	-15.2925
AGCCCC	531	87	261	137	485	0.560169	1540	0.436399	1542	-33.2934	-17.2789
ACAACG	614	99	296	157	552	0.560159	1541	0.444435	977	-30.8283	-15.3639
UGUUAC	1891	351	823	529	1703	0.560143	1542	0.442767	1080	-31.0636	-15.0861
UAAAGG	1816	331	832	484	1647	0.560127	1543	0.41462	3370	-30.3134	-14.6331
AAUCGA	906	167	383	256	806	0.560117	1544	0.440342	1248	-29.8641	-14.6661
CUAAUG	1362	236	641	359	1236	0.56011	1545	0.455557	431	-30.7544	-15.2271
AAGCUG	1256	221	564	335	1120	0.560087	1546	0.450684	656	-31.4973	-15.8876
CGACAU	830	152	374	213	739	0.560073	1547	0.445454	922	-30.929	-15.6023
CUAAAG	941	164	432	249	845	0.560013	1548	0.422365	2792	-30.0842	-14.5437
UUGACU	1919	347	852	537	1736	0.560007	1549	0.438059	1405	-30.8753	-15.1671
CCCAGA	474	80	227	112	419	0.559984	1550	0.402128	3903	-31.953	-16.7622
AAUCAG	1004	181	472	254	907	0.559983	1551	0.442085	1134	-30.2384	-14.6592
UAAACG	1069	198	487	285	970	0.559982	1552	0.439662	1287	-30.0597	-14.5165
CGUUUC	2161	391	987	584	1962	0.559973	1553	0.442856	1073	-31.7327	-15.4877
UCGAAA	979	176	425	267	868	0.559956	1554	0.443906	1006	-30.0549	-14.6547
CUUUGU	3112	573	1391	829	2793	0.559947	1555	0.442146	1131	-31.577	-15.1344
UACCCU	711	125	323	191	639	0.559933	1556	0.442896	1067	-31.4016	-16.0806
CUAUUG	1940	355	838	552	1745	0.559929	1557	0.440129	1259	-31.0107	-15.2919
CUCAGA	748	131	345	195	671	0.559925	1558	0.441748	1151	-31.0094	-15.4543
UCGAGU	1889	338	857	506	1701	0.559921	1559	0.439372	1309	-31.6248	-15.6666
CCAAUG	810	149	370	212	731	0.55989	1560	0.420768	2929	-31.2371	-15.7905
AACCUG	804	146	355	208	709	0.559855	1561	0.429333	2193	-31.7988	-15.287
AUCUGG	2025	346	944	530	1820	0.559848	1562	0.429716	2154	-31.8603	-16.3075
UUGUAU	3657	674	1643	982	3299	0.559813	1563	0.440182	1254	-30.6686	-14.3004
AGAAGC	902	154	402	241	797	0.559811	1564	0.435982	1569	-30.9585	-15.4297
UACCGA	689	128	315	183	626	0.559784	1565	0.458497	339	-31.2426	-16.1673
ACUGAC	766	135	362	192	689	0.559783	1566	0.420185	2976	-30.897	-15.8369
UAUGCC	1163	211	499	309	1019	0.559757	1567	0.426902	2401	-32.0189	-16.8412
UACGUC	1373	223	679	332	1234	0.559742	1568	0.421792	2839	-31.3751	-15.7809
AGAUCU	1321	246	589	353	1188	0.559735	1569	0.428877	2229	-30.5462	-15.0992
AGCCGA	727	112	365	191	668	0.559704	1570	0.43287	1853	-31.7313	-16.4395
UGCUUU	2971	547	1320	817	2684	0.559701	1571	0.425538	2508	-31.4885	-15.4969
CUCACC	548	101	250	151	502	0.559695	1572	0.434484	1710	-32.2034	-16.5764
AGGAGA	1362	250	586	386	1222	0.559691	1573	0.438514	1373	-30.601	-15.2819
UUCAGG	2236	399	1015	573	1987	0.559615	1574	0.433244	1823	-31.284	-15.545
GUUCAC	1304	241	575	359	1175	0.55961	1575	0.425616	2501	-31.399	-15.4841
UCCGAU	1170	209	522	336	1067	0.559588	1576	0.440427	1240	-31.4277	-15.8241
AAGAGU	1682	310	735	463	1508	0.559583	1577	0.439516	1303	-30.7263	-14.8408
GUCCAU	1230	220	553	335	1108	0.559569	1578	0.416983	3222	-31.7522	-15.727
UCUCUU	2019	368	913	542	1823	0.559554	1579	0.422692	2764	-30.844	-14.8613
UAGCCU	1116	201	500	301	1002	0.559504	1580	0.42539	2522	-31.6136	-15.0235
AGGUUU	3718	687	1654	1023	3364	0.559494	1581	0.42458	2597	-30.8974	-14.757
UAGAAG	1468	264	641	422	1327	0.55948	1582	0.442325	1115	-31.4084	-15.0999
GUUCAG	2073	381	924	536	1841	0.559478	1583	0.447046	824	-31.6079	-15.5629
UAGAAU	1658	323	686	482	1491	0.559477	1584	0.429391	2187	-30.2417	-14.9655
UCCAUG	1181	209	552	304	1065	0.559477	1585	0.427271	2373	-31.7719	-15.9559
UAUAGG	2477	436	1149	656	2241	0.559466	1586	0.431728	1954	-31.0735	-15.0736
UCCUUU	1911	336	883	497	1716	0.559462	1587	0.453684	512	-31.0734	-15.0763
UAGCAG	1334	259	543	389	1191	0.559447	1588	0.442465	1105	-31.0288	-15.503
AAACGG	1002	182	469	260	911	0.559402	1589	0.435516	1617	-30.6535	-15.1041
UCGCUA	1200	207	561	314	1082	0.559402	1590	0.434852	1680	-31.2867	-15.8181
ACAGCU	796	133	359	208	700	0.559374	1591	0.445136	940	-31.2133	-15.8512
GCACAU	901	156	410	239	805	0.559349	1592	0.437131	1484	-31.1701	-15.6254
GCCUAA	778	150	329	214	693	0.559332	1593	0.435803	1586	-31.6013	-16.3451
GAUUCA	1399	242	630	378	1250	0.559327	1594	0.431055	2025	-30.5228	-14.9493
ACUAGC	777	134	345	213	692	0.559324	1595	0.435233	1643	-31.2615	-15.8431
GGAUAG	2129	372	985	555	1912	0.559318	1596	0.434724	1688	-31.5609	-15.7754
CGAGAU	1199	220	543	315	1078	0.559311	1597	0.438768	1348	-30.9909	-15.528
UCAGCU	1245	240	545	356	1141	0.55931	1598	0.440673	1225	-31.1829	-15.4453
AGAGUC	1321	242	566	360	1168	0.559295	1599	0.430479	2077	-31.2073	-15.7952
UAUGAG	2169	387	982	583	1952	0.559295	1600	0.437488	1456	-31.3426	-15.4953
UAUGGU	3615	622	1637	969	3228	0.559295	1601	0.432302	1896	-31.6761	-15.2337
CGUCUU	1999	354	905	540	1799	0.559289	1602	0.421133	2902	-31.8475	-15.7606
UAGCAC	785	143	348	204	695	0.559276	1603	0.414338	3390	-30.8987	-15.6834
CGAGAG	1169	214	529	309	1052	0.559261	1604	0.446576	861	-31.707	-16.2217
GAAGCU	1163	206	500	318	1024	0.559253	1605	0.443014	1056	-31.0227	-15.6556
UCUGCA	1223	225	556	336	1117	0.559245	1606	0.432631	1873	-31.4619	-15.7558
GGCUCA	1304	223	588	346	1157	0.559235	1607	0.432112	1914	-32.2215	-16.6637
AUCUUC	1384	253	594	379	1226	0.559231	1608	0.448956	725	-30.3546	-14.755
ACCGUA	825	153	370	225	748	0.559229	1609	0.427267	2375	-31.1783	-16.0041
AAGCGA	897	164	415	222	801	0.559201	1610	0.428108	2293	-30.778	-15.3399
CUCUAC	792	149	348	211	708	0.559161	1611	0.44154	1167	-31.4351	-15.7614
AAGUCC	849	158	390	219	767	0.559146	1612	0.421339	2882	-31.0913	-15.639
GACGUU	1860	337	846	502	1685	0.559126	1613	0.425563	2507	-31.8882	-15.867
AGCCCA	510	96	229	135	460	0.559112	1614	0.442363	1114	-31.4704	-16.3225
UCUGAG	1795	329	801	486	1616	0.559088	1615	0.444467	975	-31.4824	-15.7736
CAUGUA	1519	270	694	392	1356	0.559039	1616	0.441896	1146	-30.7994	-15.2538
AAGCUC	835	155	349	242	746	0.559009	1617	0.426616	2427	-31.0163	-15.4517
GAGUAA	1489	262	670	399	1331	0.559003	1618	0.419922	2997	-30.6459	-14.7077
UAAUGG	2487	453	1074	675	2202	0.558997	1619	0.449933	683	-30.9205	-15.0638
UAGUAG	2104	386	910	594	1890	0.55898	1620	0.434314	1725	-31.3691	-15.1657
AACUGA	898	165	405	241	811	0.558966	1621	0.446211	885	-30.274	-15.1953
UUGCAA	1330	238	604	359	1201	0.558943	1622	0.423515	2675	-30.449	-14.706
AUUUGU	3966	728	1790	1066	3584	0.558926	1623	0.431567	1972	-31.1556	-14.2641
UCCCAG	771	131	372	190	693	0.558925	1624	0.431497	1981	-32.0713	-16.1049
UUUGUC	3227	577	1461	852	2890	0.558906	1625	0.426328	2450	-31.4331	-14.8871
CCCAAG	520	83	242	137	462	0.558884	1626	0.425635	2499	-32.1135	-16.6127
AGAAAG	1074	206	471	300	977	0.55885	1627	0.461715	260	-30.2682	-14.6485
GCUCUA	1204	231	535	331	1097	0.558841	1628	0.443329	1041	-31.7571	-16.1645
UAUCGC	1325	235	616	348	1199	0.558839	1629	0.428665	2250	-31.2051	-15.6216
CACCUU	818	148	390	216	754	0.558766	1630	0.439104	1327	-31.5804	-16.2349
GGUAAU	2414	446	1082	629	2157	0.558762	1631	0.423941	2646	-30.827	-14.8514
CGAACG	809	143	397	216	756	0.55876	1632	0.456235	405	-31.7483	-16.4817
ACGAAU	922	173	395	269	837	0.558722	1633	0.42954	2173	-30.0046	-14.8474
UUGGAA	2175	405	959	582	1946	0.558715	1634	0.418967	3070	-31.0221	-15.2897
GUUAAC	1421	261	643	364	1268	0.558703	1635	0.436567	1528	-30.618	-14.9326
CGGAAU	1387	253	622	370	1245	0.558695	1636	0.435148	1654	-31.2407	-15.6777
CUCAAG	888	156	384	229	769	0.558685	1637	0.454691	463	-30.9988	-15.4887
AUUCGC	1303	228	603	351	1182	0.558678	1638	0.428855	2234	-31.3017	-15.5409
UCAUGA	1365	244	602	373	1219	0.558641	1639	0.449598	695	-30.9495	-15.5715
GGAGUU	3056	575	1352	816	2743	0.558638	1640	0.434248	1733	-31.6468	-15.6
GGCUUU	3053	553	1350	827	2730	0.558628	1641	0.436339	1545	-32.0104	-16.068
UCGCAA	874	164	379	243	786	0.558551	1642	0.408231	3712	-30.7011	-15.2788
CCAACG	539	100	236	149	485	0.558542	1643	0.418622	3099	-31.8898	-16.3775
CUAAGA	827	155	359	229	743	0.558533	1644	0.43545	1626	-30.5639	-15.0441
CAGAGU	1314	247	554	362	1163	0.558506	1645	0.442872	1070	-31.3735	-15.6272
UACAGC	817	150	355	220	725	0.558494	1646	0.426492	2435	-31.2362	-15.8466
GGUUAA	2584	451	1170	690	2311	0.558481	1647	0.442624	1091	-30.6237	-14.6335
UUGCUC	1769	315	792	484	1591	0.558475	1648	0.422698	2763	-31.8533	-15.8543
UCCUAA	781	152	343	216	711	0.55843	1649	0.447795	782	-30.5351	-14.9755
UCUUGA	1845	350	794	514	1658	0.558364	1650	0.432879	1850	-30.9125	-15.1544
ACGAGU	1251	219	557	344	1120	0.558307	1651	0.44936	703	-31.1609	-15.5314
UGGAUU	3165	570	1383	876	2829	0.5583	1652	0.439661	1288	-31.4225	-15.2322
GAACUA	859	147	412	217	776	0.558296	1653	0.456068	411	-30.5548	-15.4435
CGAACA	535	102	239	138	479	0.558294	1654	0.438715	1354	-30.4996	-15.8013
AGGGUA	2456	430	1123	659	2212	0.558245	1655	0.429791	2145	-31.2987	-15.4872
AAGCAC	621	123	251	185	559	0.558234	1656	0.444967	950	-30.2597	-15.1711
ACAAGG	1008	184	451	269	904	0.558225	1657	0.428267	2282	-30.6337	-15.2507
AAGAAG	1064	195	461	297	953	0.558211	1658	0.482826	14	-30.0781	-14.3953
CAAAGG	1083	199	467	299	965	0.558209	1659	0.419236	3054	-30.7551	-15.3289
GUAAAG	1697	316	745	463	1524	0.558196	1660	0.424174	2620	-30.6039	-14.9392
CCGUUU	2013	362	927	535	1824	0.55806	1661	0.428647	2254	-31.8223	-15.5927
GCCGCA	788	155	335	217	707	0.558014	1662	0.431394	1988	-32.8504	-17.2219
UCACGU	1353	257	576	368	1201	0.558001	1663	0.435202	1647	-31.3697	-15.4043
ACUCGU	1399	258	605	391	1254	0.557965	1664	0.447938	774	-31.7073	-15.7171
ACCGGC	902	155	435	237	827	0.557919	1665	0.418933	3074	-33.1704	-17.623
GCGAAU	1297	247	613	344	1204	0.557919	1666	0.45378	506	-31.1817	-15.7055
GAGACA	838	145	361	235	741	0.557917	1667	0.446243	882	-31.0043	-15.6033
ACGAAG	868	156	377	239	772	0.557899	1668	0.416576	3253	-30.8275	-15.4383
UGAGCU	1693	328	701	492	1521	0.557897	1669	0.453119	533	-31.7804	-16.317
AUCACG	950	174	414	265	853	0.557878	1670	0.444118	992	-30.6156	-15.3491
UACUGU	2023	384	855	564	1803	0.557877	1671	0.427182	2381	-30.9541	-15.0925
GGCACA	881	162	399	234	795	0.55787	1672	0.453177	531	-31.7103	-16.3409
CGUUAC	1246	231	552	335	1118	0.557865	1673	0.440389	1242	-31.1251	-15.6
GCUAGA	1183	217	522	313	1052	0.557847	1674	0.416063	3282	-32.1017	-16.9238
UAGUAU	2478	451	1105	676	2232	0.557842	1675	0.422332	2796	-31.0043	-14.9033
GACUAG	1197	213	527	321	1061	0.557816	1676	0.436534	1531	-31.5007	-16.2551
GCGGAA	1345	241	610	354	1205	0.557807	1677	0.43486	1678	-31.841	-16.2931
UAUACC	808	156	346	221	723	0.55777	1678	0.435564	1607	-30.7964	-15.8706
ACCAAG	562	102	244	150	496	0.557642	1679	0.461513	266	-31.1328	-15.6849
CUAGCU	1116	205	484	304	993	0.557606	1680	0.424081	2634	-31.645	-15.7438
UAGAGU	2205	392	991	583	1966	0.557587	1681	0.435212	1646	-31.3301	-15.2467
UGUAUC	2001	360	913	530	1803	0.557568	1682	0.436272	1547	-31.0851	-15.0576
AUGCCA	761	134	358	196	688	0.557531	1683	0.435239	1642	-31.6277	-16.5325
AUAGCG	1304	214	600	342	1156	0.557527	1684	0.441385	1183	-31.3148	-15.7696
GAUCGC	1147	204	513	308	1025	0.557494	1685	0.42885	2236	-32.3325	-16.0347
GCGCAA	829	141	396	211	748	0.557462	1686	0.421774	2842	-31.5287	-16.1424
GAGAGU	1949	349	870	525	1744	0.557449	1687	0.427937	2313	-31.3058	-15.6855
AGCAAU	960	180	420	264	864	0.557446	1688	0.422704	2760	-29.935	-14.9102
CACACU	584	105	272	149	526	0.557445	1689	0.46808	146	-30.2965	-15.2138
UCGGAU	1975	358	893	529	1780	0.55744	1690	0.433292	1816	-31.3827	-15.5916
CCUUAC	783	147	368	203	718	0.557421	1691	0.43891	1341	-31.4476	-16.1243
ACUACC	506	97	221	137	455	0.557411	1692	0.434478	1711	-31.1579	-16.2105
CAGGUA	1409	255	638	362	1255	0.557404	1693	0.429784	2147	-31.2399	-15.6269
CGAUAC	743	128	350	196	674	0.557397	1694	0.442838	1075	-30.8411	-15.698
UACAGU	1447	268	628	391	1287	0.557334	1695	0.454517	474	-31.0221	-15.3841
AAUGUU	2696	522	1199	747	2468	0.557305	1696	0.436386	1543	-30.3372	-14.3467
AGGACA	945	168	425	246	839	0.55726	1697	0.45919	317	-31.4466	-16.4377
CCAUCU	806	146	369	216	731	0.557229	1698	0.422256	2806	-31.2124	-15.6947
CUGUUC	1840	323	845	493	1661	0.557216	1699	0.441225	1199	-31.7994	-15.7447
GGGAAA	1500	270	662	407	1339	0.557208	1700	0.447183	817	-30.6714	-15.048
CUGAAC	736	118	352	186	656	0.557192	1701	0.42099	2910	-30.9895	-16.1296
UCAAGC	844	154	395	220	769	0.557169	1702	0.437604	1447	-30.8312	-15.5652
CAUCAA	653	115	312	159	586	0.557168	1703	0.448604	739	-29.8578	-14.7888
CAGGAU	1366	254	597	368	1219	0.557162	1704	0.428811	2240	-31.2098	-15.7899
UUUAGC	2081	391	911	568	1870	0.557156	1705	0.443315	1042	-30.6649	-14.9989
AAGUAG	1526	280	677	407	1364	0.557119	1706	0.422506	2775	-30.5532	-14.647
AUUGGC	2050	358	921	553	1832	0.557087	1707	0.41724	3197	-31.5105	-15.7718
GACCUC	783	150	359	214	723	0.557086	1708	0.437645	1442	-32.757	-17.1905
UGACGU	1862	351	806	521	1678	0.557081	1709	0.430239	2104	-32.0624	-16.0786
AAAGGU	1895	343	864	497	1704	0.557075	1710	0.415742	3305	-30.4428	-14.5425
CCGUAC	797	134	384	204	722	0.557066	1711	0.421982	2825	-32.3365	-16.8399
GUAUAG	2396	424	1092	622	2138	0.557042	1712	0.415556	3324	-31.7988	-16.3198
CACUCA	565	107	257	154	518	0.557006	1713	0.413395	3444	-30.8823	-15.2285
GCAUUC	1216	221	536	322	1079	0.557002	1714	0.425612	2502	-31.2275	-15.6994
CCGUAA	803	154	344	216	714	0.556989	1715	0.426533	2433	-31.246	-15.6858
CCAGCU	786	144	364	209	717	0.556986	1716	0.421659	2849	-31.9924	-16.4128
ACCUGA	723	138	327	198	663	0.55695	1717	0.445732	908	-31.5505	-16.2384
UUUGGC	2932	546	1333	782	2661	0.556889	1718	0.429607	2168	-31.9791	-15.922
UCCUAG	1109	195	510	292	997	0.55685	1719	0.435184	1652	-32.045	-16.3775
UUACGG	2063	383	906	566	1855	0.556833	1720	0.424279	2613	-31.2761	-15.7113
CUCCUA	749	146	313	232	691	0.556816	1721	0.442683	1087	-31.5199	-15.7153
GAUGAA	1342	238	588	375	1201	0.556811	1722	0.424669	2590	-30.1217	-15.0041
UUGAAC	1244	237	542	343	1122	0.556796	1723	0.42582	2487	-30.6597	-15.2825
ACUAGU	1346	241	607	355	1203	0.556795	1724	0.453353	526	-31.1702	-15.3514
UACUUG	2039	389	862	565	1816	0.556794	1725	0.435269	1638	-31.1539	-15.4836
UAUGUC	2105	403	983	566	1952	0.556776	1726	0.431619	1968	-31.0407	-15.1679
AUCCUU	1222	213	591	308	1112	0.556747	1727	0.42806	2299	-31.0699	-15.2086
GAAUUG	2143	393	925	599	1917	0.55673	1728	0.440158	1256	-30.6106	-14.9435
CAGGGA	1395	248	617	367	1232	0.556716	1729	0.424134	2625	-31.5432	-16.183
CCUUCC	790	135	358	199	692	0.556715	1730	0.450405	666	-32.1956	-16.2722
GCAAAU	1024	182	453	274	909	0.556695	1731	0.431813	1948	-30.1966	-14.8266
CAAAGU	992	178	457	248	883	0.556694	1732	0.414398	3387	-30.3092	-14.4734
CUGACC	705	129	323	186	638	0.556657	1733	0.428867	2232	-32.233	-16.7366
ACUCCU	846	159	384	229	772	0.556645	1734	0.481147	18	-31.5411	-15.8294
GUAGAA	1501	274	644	410	1328	0.556644	1735	0.436357	1544	-30.9433	-15.0377
UAAUCG	1542	290	662	413	1365	0.556628	1736	0.430437	2085	-30.3733	-14.7221
GAGACU	1203	216	529	315	1060	0.556624	1737	0.441237	1198	-31.0248	-15.8952
CGACAA	565	98	261	142	501	0.556621	1738	0.456612	391	-30.2467	-14.9327
UCCCAA	503	87	218	140	445	0.55662	1739	0.396747	3993	-31.1408	-15.4512
CAACCG	617	124	268	177	569	0.556596	1740	0.425701	2493	-31.9105	-16.601
ACCUAU	801	154	356	213	723	0.55659	1741	0.445166	936	-30.7822	-15.4996
CAACAU	656	113	300	170	583	0.556546	1742	0.436127	1557	-29.9267	-14.4491
GAUCAA	907	156	414	237	807	0.556538	1743	0.418299	3135	-30.0945	-14.7974
AGACAA	650	105	295	177	577	0.556533	1744	0.458961	325	-30.2842	-14.447
CUAAGG	1322	231	587	349	1167	0.556533	1745	0.436506	1534	-31.5366	-15.843
CUAUCC	831	154	380	219	753	0.556451	1746	0.430721	2054	-31.5209	-15.8915
CACAGG	917	155	433	219	807	0.556449	1747	0.435264	1639	-31.804	-16.4704
AUCAGC	883	163	385	233	781	0.556446	1748	0.436949	1491	-31.0334	-15.5734
GCCACA	483	88	221	127	436	0.556446	1749	0.459004	323	-31.8287	-16.5062
UACUCC	796	139	368	210	717	0.556446	1750	0.446542	864	-31.3098	-15.6976
GCUAAG	1215	230	537	316	1083	0.556432	1751	0.424286	2612	-31.7028	-16.1003
AUGCAA	942	174	420	258	852	0.556425	1752	0.443357	1037	-30.2574	-14.9328
AUCAAG	1014	186	439	267	892	0.556411	1753	0.424089	2632	-30.1323	-14.8749
GUACGA	1192	226	517	335	1078	0.556411	1754	0.445866	903	-31.462	-15.8162
CAAUAG	946	179	437	251	867	0.556403	1755	0.438658	1357	-30.4891	-14.8599
CCUACC	476	88	212	134	434	0.556366	1756	0.428441	2269	-32.1673	-16.8573
GUUUCC	1905	338	878	497	1713	0.556352	1757	0.441505	1170	-31.8472	-15.6011
GUCAAU	1529	265	665	412	1342	0.556308	1758	0.42641	2440	-30.4407	-14.6139
CUGGAA	1198	214	544	310	1068	0.556306	1759	0.419704	3014	-32.0208	-16.9804
CAUCUC	936	173	422	252	847	0.556292	1760	0.458949	326	-31.2812	-15.9281
UUAGGU	3707	707	1616	1011	3334	0.556274	1761	0.444064	995	-31.435	-15.1156
ACAGAG	900	160	400	237	797	0.556265	1762	0.420957	2914	-30.9611	-15.6327
ACGACC	518	90	243	138	471	0.556254	1763	0.425341	2529	-31.6971	-16.6738
UUCAUG	2182	394	1024	574	1992	0.556214	1764	0.446015	895	-30.9384	-15.1419
AGUUUG	3468	655	1507	939	3101	0.556184	1765	0.429668	2160	-31.7306	-14.9555
UGCUAC	1063	190	468	288	946	0.556179	1766	0.434468	1712	-31.336	-15.8367
ACCUUG	1219	229	532	341	1102	0.556177	1767	0.411527	3555	-31.7343	-16.5182
UUGUCU	3028	558	1324	825	2707	0.556173	1768	0.431258	2000	-31.5049	-15.0331
CUUGUC	1758	325	773	479	1577	0.556169	1769	0.418729	3092	-31.8462	-16.5863
UAGUUG	3122	573	1410	824	2807	0.55614	1770	0.433232	1824	-31.5409	-15.209
UACCAC	513	97	221	141	459	0.556125	1771	0.447503	803	-31.0723	-15.7548
GCAGUA	1372	251	611	363	1225	0.556124	1772	0.434538	1706	-31.314	-15.4916
GCGCAC	887	155	410	230	795	0.556098	1773	0.430089	2114	-32.5349	-16.9124
CAGUAU	1518	273	693	391	1357	0.55606	1774	0.428277	2281	-30.8206	-15.0009
ACGUAG	1321	236	587	355	1178	0.556029	1775	0.400619	3939	-31.5074	-15.8905
CUACAG	798	160	332	229	721	0.556028	1776	0.434116	1746	-31.2764	-15.7697
GUUCAU	2191	407	967	587	1961	0.55602	1777	0.43373	1787	-30.9366	-14.9544
UGGAAA	1527	288	670	412	1370	0.556014	1778	0.431158	2007	-30.889	-15.0407
UUCGCU	1892	340	884	488	1712	0.555995	1779	0.430893	2037	-31.5416	-15.6489
UGCUUG	2662	487	1217	718	2422	0.555974	1780	0.424693	2587	-32.4844	-16.3401
UAUGGA	2143	402	928	588	1918	0.555963	1781	0.428656	2253	-31.39	-15.7753
CGGACU	1283	234	576	344	1154	0.555918	1782	0.446448	868	-32.1722	-16.8657
CGCCAU	839	158	384	224	766	0.555914	1783	0.420652	2941	-32.021	-16.3332
UGAUUC	1892	335	826	498	1659	0.555911	1784	0.434111	1748	-30.8221	-15.0902
AUUCCG	1346	249	628	346	1223	0.555891	1785	0.437566	1453	-31.5229	-15.6404
GAUAUG	2181	384	985	570	1939	0.555888	1786	0.443529	1026	-31.144	-15.4424
UGUUUA	3841	728	1670	1041	3439	0.555877	1787	0.436894	1493	-30.948	-14.3028
UCUACU	1164	208	510	313	1031	0.555862	1788	0.449323	706	-30.7742	-14.7649
CCGACU	786	139	372	197	708	0.555786	1789	0.402585	3885	-32.4373	-16.7111
CCACAA	364	74	161	99	334	0.555781	1790	0.456421	401	-31.0792	-15.3791
AUUGGU	3491	638	1535	941	3114	0.55578	1791	0.434603	1695	-31.4203	-15.1621
CUAACG	810	152	343	219	714	0.555753	1792	0.426829	2410	-30.8392	-15.5317
UGAAUG	2116	395	938	578	1911	0.555751	1793	0.447758	784	-31.1296	-15.2402
CUGCAA	784	148	340	210	698	0.555745	1794	0.385426	4082	-31.1013	-15.5353
CUUCAG	1307	244	599	341	1184	0.555738	1795	0.43455	1704	-31.3664	-15.6408
AGUACA	914	168	398	243	809	0.555725	1796	0.410922	3585	-31.5977	-15.7909
GCCUUU	1793	333	810	478	1621	0.555708	1797	0.423151	2708	-31.9733	-16.292
GAUGAU	1952	359	868	543	1770	0.555707	1798	0.426617	2426	-30.7879	-15.3925
ACUGUC	1328	248	583	345	1176	0.555704	1799	0.425438	2517	-31.5235	-15.6806
GACUCU	1175	208	551	294	1053	0.555686	1800	0.451868	590	-31.7636	-16.1623
UUUAGG	3649	681	1560	990	3231	0.555666	1801	0.441238	1197	-31.3837	-15.0884
AGGAUC	1343	250	596	361	1207	0.555653	1802	0.437896	1417	-31.2361	-15.6586
UCCACA	579	104	269	146	519	0.555648	1803	0.458311	344	-31.3485	-15.8158
CAAGCU	785	142	356	209	707	0.555638	1804	0.422781	2750	-31.0497	-15.7502
AGACGU	1308	244	586	346	1176	0.555632	1805	0.420209	2974	-31.8691	-16.2287
AGCUAC	788	142	363	212	717	0.55561	1806	0.447724	789	-31.1272	-15.9734
CCAGGU	1313	231	608	336	1175	0.555602	1807	0.441295	1194	-32.4123	-16.6257
GCUUGA	1805	331	805	482	1618	0.555596	1808	0.425089	2548	-31.6682	-16.1011
CACCUC	616	102	304	156	562	0.555593	1809	0.466181	170	-32.0612	-16.5146
UCGUUU	3228	616	1442	838	2896	0.555571	1810	0.431613	1969	-31.0749	-14.6925
ACUCUC	898	170	402	237	809	0.55556	1811	0.437747	1434	-31.3753	-15.7827
UUAGGA	2236	399	1010	609	2018	0.555559	1812	0.433151	1828	-31.1361	-15.4035
ACGUUG	2016	390	867	564	1821	0.555554	1813	0.440865	1218	-31.8708	-15.7
UCUAGC	1162	204	544	313	1061	0.555548	1814	0.430661	2058	-31.397	-16.0064
GUAAUC	1434	277	622	378	1277	0.555527	1815	0.436123	1558	-30.5537	-14.7721
AGUAGC	1261	225	559	340	1124	0.555507	1816	0.410088	3630	-31.2783	-15.6528
CUUAGU	1980	368	868	535	1771	0.555506	1817	0.412192	3526	-31.6891	-15.444
UAUCGA	1321	263	574	364	1201	0.555496	1818	0.452559	556	-30.0924	-14.7762
GCUGAC	1072	194	483	285	962	0.555478	1819	0.447305	810	-32.2835	-16.8862
UCGUCU	2001	362	934	515	1811	0.555428	1820	0.42907	2213	-31.8459	-15.6004
UCCCCA	501	95	215	148	458	0.555426	1821	0.434063	1755	-32.0418	-15.9283
UUGAUC	1867	333	851	493	1677	0.555416	1822	0.437435	1464	-30.6232	-15.0554
UUCUCC	1204	231	526	344	1101	0.555411	1823	0.422526	2774	-31.4597	-15.4921
ACAUAG	1023	181	459	283	923	0.555395	1824	0.431099	2015	-30.9139	-15.2801
AGACAG	900	171	392	245	808	0.555378	1825	0.433062	1838	-31.0417	-15.5009
AUGCGA	1184	218	554	322	1094	0.555375	1826	0.413797	3428	-31.0521	-15.7621
AGAGAG	1287	258	539	356	1153	0.555372	1827	0.431889	1935	-31.1011	-15.5108
UUGGCA	1934	361	897	514	1772	0.555359	1828	0.420947	2916	-31.2939	-15.6998
AUCCAG	854	163	356	239	758	0.555343	1829	0.433148	1829	-31.2023	-15.5055
CGUGAU	1751	308	786	474	1568	0.555342	1830	0.438283	1395	-32.1518	-16.3799
CCUACU	748	140	316	205	661	0.555334	1831	0.442025	1138	-31.5687	-15.7576
CUAGUC	1182	218	537	309	1064	0.555329	1832	0.452603	555	-31.5074	-15.9281
AAAGGG	1873	334	827	496	1657	0.555298	1833	0.435148	1655	-30.8729	-15.1379
UUUGCU	2906	554	1271	803	2628	0.555276	1834	0.426817	2412	-31.671	-15.2153
AACAAC	399	78	171	108	357	0.555257	1835	0.445614	912	-29.6795	-14.7332
ACCCGU	873	146	423	212	781	0.555233	1836	0.422284	2802	-32.4471	-16.8515
UUAGCU	1998	367	922	527	1816	0.555221	1837	0.455811	419	-30.8281	-15.2911
UUCGCA	1236	223	573	333	1129	0.555216	1838	0.425078	2549	-31.0633	-15.3862
GAUUGG	3116	559	1381	835	2775	0.555202	1839	0.441324	1189	-31.6467	-15.7084
AAGUCA	993	189	410	274	873	0.555183	1840	0.433774	1780	-30.2488	-14.7565
UGCGAC	1074	189	491	272	952	0.555175	1841	0.449179	714	-32.3012	-16.7682
CAGAUC	771	154	341	211	706	0.555167	1842	0.443162	1050	-30.8676	-15.7895
AACACU	634	102	296	155	553	0.555161	1843	0.431083	2018	-30.1359	-15.0583
CACACC	383	60	190	90	340	0.555155	1844	0.452462	558	-31.3887	-16.3063
CCAUAC	512	92	232	126	450	0.555142	1845	0.44327	1046	-31.0053	-15.9974
GACGUA	1267	251	528	358	1137	0.555142	1846	0.417034	3214	-31.5857	-16.2902
UGAUGA	1874	355	786	547	1688	0.555129	1847	0.425708	2492	-30.8586	-15.3362
AUCGAG	1292	236	574	329	1139	0.555123	1848	0.447861	777	-30.8713	-15.5519
ACCCAG	515	92	234	126	452	0.555106	1849	0.435971	1572	-31.9135	-16.5301
CUAGCA	748	142	333	206	681	0.555038	1850	0.442987	1060	-30.9201	-15.7414
CUACUG	1151	223	490	318	1031	0.555028	1851	0.432527	1880	-31.7101	-15.9104
CAGAAA	672	127	288	177	592	0.555017	1852	0.462572	231	-29.5634	-14.6799
GGAUCA	1348	243	593	366	1202	0.555007	1853	0.437661	1441	-31.0615	-15.3776
UUUAGU	3823	715	1683	1028	3426	0.554997	1854	0.43323	1825	-31.1383	-14.5557
ACGUAU	1507	282	648	412	1342	0.554989	1855	0.428393	2272	-30.8193	-15.4762
CUUCGU	2092	392	960	542	1894	0.554979	1856	0.436716	1514	-31.8926	-15.6414
UAAGCG	1395	247	613	365	1225	0.554977	1857	0.428105	2294	-31.1237	-15.4823
UUGUAG	3139	601	1368	861	2830	0.554954	1858	0.435749	1592	-31.4471	-15.0378
GCAGUU	1940	370	849	514	1733	0.55495	1859	0.430071	2116	-31.4557	-15.6047
AGUAAG	1517	285	660	422	1367	0.554943	1860	0.433069	1837	-30.5711	-14.7885
ACUGAG	1178	220	520	317	1057	0.554929	1861	0.430505	2074	-31.2022	-16.037
GUUUGA	3168	601	1417	860	2878	0.554922	1862	0.431024	2030	-31.2099	-14.7793
GAGUCC	1208	219	560	317	1096	0.554919	1863	0.422716	2758	-32.5955	-16.8082
GUUAUG	3345	636	1461	901	2998	0.554899	1864	0.432145	1908	-31.4075	-15.2191
UUGAGA	2020	380	836	575	1791	0.554862	1865	0.4278	2328	-30.3259	-14.8956
CUUGAU	1812	329	803	495	1627	0.554849	1866	0.434376	1721	-30.8269	-15.3343
CAACGU	873	153	414	217	784	0.554847	1867	0.418002	3157	-31.0925	-15.5384
UCUAAC	837	161	359	234	754	0.554832	1868	0.411389	3560	-30.4609	-15.1264
GGAAGA	1366	256	597	359	1212	0.55482	1869	0.454424	479	-31.193	-15.5226
UUGCAG	1807	333	800	484	1617	0.554809	1870	0.43402	1760	-31.639	-15.5841
UUGGAG	3099	554	1403	796	2753	0.554805	1871	0.442392	1112	-31.863	-15.9557
AGUUGU	3233	594	1427	856	2877	0.554793	1872	0.429989	2122	-31.4559	-14.9361
GGUCAU	2083	378	958	548	1884	0.554756	1873	0.428198	2288	-31.7733	-15.9674
ACAGAU	944	193	393	264	850	0.554714	1874	0.422154	2812	-30.1821	-15.0726
CUCUUG	1760	329	808	467	1604	0.554707	1875	0.428494	2266	-32.0523	-16.0667
UGCAAU	1338	252	593	354	1199	0.554703	1876	0.429973	2125	-30.7213	-15.1606
ACAGUC	926	173	417	240	830	0.55467	1877	0.422932	2731	-31.117	-15.6936
AGUCGC	1223	211	572	310	1093	0.554667	1878	0.422827	2742	-32.37	-16.6181
CACAGU	864	164	376	240	780	0.554664	1879	0.434421	1718	-30.8974	-15.4017
UUCGGA	2057	377	923	539	1839	0.554647	1880	0.446051	893	-31.0893	-15.4602
GCACCA	491	88	232	125	445	0.554646	1881	0.391737	4052	-31.5534	-16.3834
ACCACU	571	96	279	147	522	0.554615	1882	0.421813	2835	-31.2992	-15.8262
GAAGUA	1480	263	686	368	1317	0.554589	1883	0.421972	2827	-31.1886	-14.7764
ACUGUA	1331	242	584	368	1194	0.554582	1884	0.429506	2176	-30.5448	-15.1065
UGAGGA	1887	363	788	527	1678	0.554573	1885	0.446182	887	-31.1972	-15.6899
CUGUCA	1258	225	582	323	1130	0.554525	1886	0.449947	681	-31.4087	-15.5001
AAGCCU	804	151	363	211	725	0.554518	1887	0.435457	1623	-31.0702	-15.989
CGUACU	1182	212	550	318	1080	0.554515	1888	0.438817	1345	-31.6493	-16.2184
GAGUCU	1920	345	881	490	1716	0.554512	1889	0.431579	1970	-31.7949	-15.9403
GAUAGU	2168	397	965	578	1940	0.554508	1890	0.433093	1834	-31.2339	-15.21
AUGGAU	2172	388	928	592	1908	0.554503	1891	0.426415	2439	-30.9449	-15.2122
ACCUUC	817	153	374	206	733	0.55449	1892	0.460688	282	-31.3415	-15.9636
GAAAGA	1022	191	429	287	907	0.55449	1893	0.446683	850	-29.9217	-14.5336
AGCGAA	870	170	384	227	781	0.554484	1894	0.451652	603	-30.7167	-15.3264
UCUCUC	1229	226	567	319	1112	0.554459	1895	0.442079	1135	-31.637	-15.4803
CCCCCA	388	67	190	99	356	0.55443	1896	0.426339	2448	-32.9249	-16.762
UCACAC	627	113	280	163	556	0.554422	1897	0.416936	3225	-30.7857	-15.3684
UUUCCC	1257	224	587	329	1140	0.554413	1898	0.432042	1924	-31.5505	-15.3533
AGUAGU	2148	425	922	613	1960	0.554412	1899	0.444371	980	-31.2887	-14.903
ACUUGA	1269	240	538	355	1133	0.554406	1900	0.4188	3086	-30.6759	-15.3545
GCUAUG	1866	342	834	509	1685	0.554397	1901	0.442724	1084	-31.9424	-16.2095
AGUCCU	1277	235	592	336	1163	0.554388	1902	0.44162	1160	-31.7222	-15.9846
GGAUUC	1988	343	928	512	1783	0.554377	1903	0.444473	974	-31.7321	-15.7775
CUGUGA	1630	292	788	409	1489	0.554365	1904	0.443911	1005	-31.9715	-15.9678
UGAUUG	2993	558	1298	819	2675	0.554329	1905	0.422119	2814	-31.4454	-15.256
UGGCUA	1823	343	819	471	1633	0.554317	1906	0.434597	1698	-31.9707	-16.2946
ACCGCU	813	145	384	202	731	0.554292	1907	0.436189	1552	-32.5077	-16.8229
UGUACA	1417	268	637	376	1281	0.554274	1908	0.446024	894	-31.1023	-15.5094
UCAGCA	870	151	387	229	767	0.554256	1909	0.45406	494	-30.567	-15.4434
UAGUAA	1656	304	726	441	1471	0.554241	1910	0.443952	1001	-30.2846	-14.4058
AGCAAC	521	91	234	132	457	0.55422	1911	0.434254	1732	-30.8144	-15.4775
AUCGGC	1349	243	631	334	1208	0.554205	1912	0.425493	2512	-32.2116	-16.482
CCGAAC	515	96	246	133	475	0.554185	1913	0.446896	834	-31.831	-16.4536
GUAUCU	2029	365	910	535	1810	0.554173	1914	0.430417	2089	-31.114	-15.4053
CGACCU	780	153	347	203	703	0.554169	1915	0.440732	1223	-31.9813	-16.6805
CUAACA	585	116	254	161	531	0.554129	1916	0.41043	3610	-30.0451	-15.2341
GCGACU	1172	207	563	289	1059	0.554114	1917	0.433989	1762	-32.2196	-16.7351
GGUUAU	3656	695	1585	989	3269	0.554102	1918	0.422297	2801	-31.1289	-15.0893
CGCGUA	1235	218	569	320	1107	0.554096	1919	0.410165	3624	-32.1423	-16.4241
GCAUAA	1020	183	462	260	905	0.55409	1920	0.444616	966	-30.3914	-15.1543
GUUAAG	2491	477	1050	696	2223	0.554077	1921	0.425218	2541	-30.811	-14.8086
GCAGAA	859	158	370	238	766	0.55407	1922	0.441979	1141	-30.7743	-15.5447
UCGCCA	850	154	391	226	771	0.55406	1923	0.429965	2126	-31.9597	-16.2593
GAUCCC	743	122	337	198	657	0.554043	1924	0.449713	689	-32.4979	-16.341
CUACCC	540	92	252	141	485	0.55404	1925	0.410325	3614	-32.158	-16.5296
UCAGGG	2129	381	964	534	1879	0.554025	1926	0.433474	1802	-31.9727	-16.1839
UGAUCU	1868	337	860	471	1668	0.554017	1927	0.427392	2362	-31.1374	-15.4159
GUUGAA	2039	365	914	533	1812	0.554	1928	0.426902	2402	-30.6414	-14.7042
AGUCAU	1497	282	655	402	1339	0.553942	1929	0.430309	2097	-30.7369	-15.0803
UCAAGU	1556	274	698	399	1371	0.553915	1930	0.421634	2852	-30.5225	-14.597
UAGGCC	1204	224	519	333	1076	0.553907	1931	0.437978	1410	-32.5993	-17.0664
AUGCAU	1395	262	605	358	1225	0.553896	1932	0.44559	914	-30.7533	-15.4582
CUUGUU	3047	547	1401	784	2732	0.553896	1933	0.419772	3010	-31.3631	-15.1234
GCUUUC	1784	329	819	471	1619	0.553853	1934	0.415797	3296	-31.7987	-15.9194
UGCCGA	1017	186	459	272	917	0.55384	1935	0.451596	606	-32.1663	-16.7961
UCCACG	837	146	414	205	765	0.553831	1936	0.417294	3195	-32.266	-16.401
AGAAUG	1546	296	670	423	1389	0.553818	1937	0.414522	3378	-30.4969	-15.1476
AAGAGG	1585	297	714	420	1431	0.553813	1938	0.430165	2109	-30.8173	-15.1213
AUAGAA	1061	210	455	298	963	0.553813	1939	0.439388	1308	-30.4186	-14.7074
UGCCAG	1126	203	524	292	1019	0.553804	1940	0.435543	1612	-32.5092	-16.8156
CGCUUA	1225	233	535	329	1097	0.553802	1941	0.427897	2315	-31.3187	-15.7298
UCGAUA	1300	235	581	346	1162	0.553792	1942	0.432078	1921	-30.2507	-14.765
GAGGAU	1991	383	858	541	1782	0.553787	1943	0.428505	2265	-31.1839	-15.858
UUGAUG	3083	578	1353	838	2769	0.553776	1944	0.43478	1687	-31.3535	-15.3682
GGGGAA	2088	386	959	545	1890	0.553773	1945	0.441336	1187	-31.3757	-15.6297
UCGUGA	1821	334	856	464	1654	0.55377	1946	0.431949	1930	-32.0013	-16.0345
CCUGUU	1694	313	767	440	1520	0.553736	1947	0.409628	3652	-32.2284	-16.1831
UCGAAG	1249	236	548	339	1123	0.553702	1948	0.421279	2886	-30.8831	-15.2334
GCGUUU	3043	591	1310	810	2711	0.55369	1949	0.448059	765	-32.2511	-15.5975
UCGUAG	1901	355	828	517	1700	0.553684	1950	0.434153	1741	-31.6605	-15.5906
UUCGAC	1270	238	564	331	1133	0.553676	1951	0.421003	2908	-31.142	-15.5679
GCAAUA	918	186	386	256	828	0.553675	1952	0.435852	1579	-30.063	-14.8008
CCCACA	380	70	172	104	346	0.553669	1953	0.417025	3216	-31.1444	-15.8746
CAAUGG	1313	234	627	322	1183	0.553662	1954	0.429669	2159	-31.3109	-16.2821
CCGUAG	1153	205	528	291	1024	0.553658	1955	0.428346	2277	-32.4624	-16.5156
CUACUA	736	132	320	197	649	0.553634	1956	0.429654	2163	-30.6324	-15.0673
CAACUA	573	111	244	163	518	0.55363	1957	0.432107	1915	-29.8836	-14.6134
UGAAAG	1479	281	642	393	1316	0.55363	1958	0.446267	879	-30.5952	-14.8938
GGUUUC	3226	611	1475	854	2940	0.553611	1959	0.427155	2384	-31.6784	-15.4932
CCCUCU	880	167	393	235	795	0.553608	1960	0.420477	2957	-32.6537	-16.5254
CCAAAG	570	100	256	145	501	0.553606	1961	0.412425	3511	-30.8649	-15.6125
ACAGCA	592	115	226	169	510	0.553599	1962	0.459315	310	-31.1483	-15.8082
GCACUG	1215	218	549	320	1087	0.553597	1963	0.428629	2256	-32.1352	-16.6002
CAGCAU	863	158	381	224	763	0.553587	1964	0.447202	815	-31.2359	-15.9499
ACGUGA	1246	233	565	335	1133	0.553585	1965	0.445873	901	-31.9779	-16.4719
AACGAU	940	180	402	263	845	0.553572	1966	0.427268	2374	-29.8155	-14.6755
UGCCUA	1136	209	508	297	1014	0.553569	1967	0.432693	1867	-32.4572	-17.002
GAUACG	1289	232	602	332	1166	0.553565	1968	0.442972	1062	-30.9435	-15.7255
CUACGA	765	137	363	194	694	0.553544	1969	0.419805	3002	-30.768	-15.6941
UGGAUA	2144	407	952	565	1924	0.553523	1970	0.442148	1130	-31.4092	-15.6866
CGCACA	596	107	260	160	527	0.553481	1971	0.423215	2702	-30.9921	-15.6467
CAUCGA	853	160	376	231	767	0.553479	1972	0.423327	2690	-30.844	-15.6216
UCGACA	841	152	381	214	747	0.553457	1973	0.446219	884	-30.9397	-15.4687
CCAACA	365	70	163	96	329	0.553429	1974	0.42382	2654	-30.8942	-15.3131
AGCUGU	1839	354	827	482	1663	0.553414	1975	0.429739	2151	-31.9481	-15.982
GGUAUU	3725	671	1720	948	3339	0.553391	1976	0.426372	2445	-31.3193	-15.0369
UACUGG	1974	382	878	540	1800	0.553391	1977	0.437736	1435	-32.0345	-16.3387
AGGGUU	3659	683	1637	967	3287	0.553383	1978	0.45008	679	-31.5083	-15.3821
UGGCUU	2896	557	1256	786	2599	0.55337	1979	0.427327	2366	-32.3595	-16.2015
GGCUUA	2024	375	899	530	1804	0.553334	1980	0.431855	1943	-31.8343	-16.1867
UUCUGG	2983	548	1336	776	2660	0.553334	1981	0.431062	2020	-32.23	-16.1479
UAGGCA	1369	257	609	367	1233	0.553333	1982	0.430551	2069	-31.5593	-15.8099
UGACCU	1080	199	488	289	976	0.553331	1983	0.414797	3358	-31.6242	-16.3018
CAGCAG	809	157	345	220	722	0.553323	1984	0.422986	2728	-31.4965	-16.2141
CGCAAA	587	109	258	153	520	0.553315	1985	0.424644	2591	-30.5287	-15.2338
CUUCUG	1792	318	817	459	1594	0.553293	1986	0.425898	2485	-31.9605	-15.9062
GAGAAG	1370	241	618	350	1209	0.553292	1987	0.4331	1833	-30.7745	-15.1265
CACCAC	410	58	224	86	368	0.553284	1988	0.407213	3747	-30.9262	-15.7786
CUGCAC	815	151	354	222	727	0.553284	1989	0.471285	95	-32.1366	-16.3271
AGGAAA	1198	234	506	332	1072	0.55327	1990	0.414239	3396	-29.8252	-14.4626
CUGGAC	1183	213	550	306	1069	0.553261	1991	0.436689	1515	-32.7244	-17.2918
AUCCCA	518	98	231	135	464	0.553256	1992	0.421258	2889	-30.8866	-15.3692
AUCGCU	1333	250	610	350	1210	0.553224	1993	0.428756	2242	-31.5191	-15.9857
CUGAGU	1830	347	799	496	1642	0.553214	1994	0.423194	2705	-31.608	-15.9252
GAACGA	878	168	384	243	795	0.553116	1995	0.429914	2134	-30.6905	-15.7417
UACCUA	762	147	333	209	689	0.553111	1996	0.440582	1233	-30.8312	-15.9083
GGACAU	1407	255	628	370	1253	0.553108	1997	0.43293	1845	-31.8479	-16.4999
[truncated: 2,099 more rows]
