# Supplementary material
Source: HighWire-hosted journal article supplement (doi:10.1101/rna.079752.123)
Supplement: Supplemental_TableS3.xlsx [file Supplemental_TableS3.xlsx]

## Sheet: counts_5mers
TABLE S3. Occurrences and frequency (ƒ) of each possible pentamer in native S. Cerevisiae introns as well as their enrichment relative to 5 M randomly shuffled pentamers that have the same nucleotide composition of introns, coding sequences (CDS) and non-coding sequences (NCS) found in the native genome. Enrichment is presented as log2 and ranked from highest (rank 1) to lowest (rank 1024).
	occurances of pentamer			frequency (ƒ) of pentamer relative to all			enrichment		pentamer occurances in all shuffled pentamers			pentamer ƒ among all shuffled pentamers			enrichment log2(ƒ/ƒ shuffle)								nucleotide occurances in Sc genome			nucleotide ƒ in Sc genome
pentamer	NCS	CDS	intron	NCS	CDS	intron	log2(ƒ intron/ ƒ CDS)	log2(ƒ intron/ ƒ NCS)	NCS	CDS	intron	NCS	CDS	intron	NCS	rank	CDS	rank	intron	rank			Intron	NCS	CDS	Intron	NCS	CDS
CUAAC	2129	5887	320	0.000668198	0.000674323	0.00455996	2.77068	2.75751	53695	55096	53548	0.0010739	0.00110192	0.00107096	-0.684512	1005	-0.708507	932	2.09012	1		T	24028	1047103	2638906	0.335652	0.326048	0.301319
GUAUG	2953	6462	279	0.000926815	0.000740186	0.00397572	2.10086	2.42526	50930	52911	50559	0.0010186	0.00105822	0.00101118	-0.136235	629	-0.515679	841	1.97518	2		A	23492	1046305	2644760	0.328165	0.325799	0.301988
UUUUU	35138	33064	1020	0.0110282	0.0037873	0.0145349	0.398316	1.94028	191231	126077	190366	0.00382462	0.00252154	0.00380732	1.52782	2	0.586864	97	1.93267	3		C	11778	561027	1736972	0.164529	0.174693	0.198334
ACUAA	4453	8082	379	0.0013976	0.000925748	0.00540071	1.9502	2.54446	101313	87449	101667	0.00202626	0.00174898	0.00203334	-0.53587	961	-0.917822	999	1.4093	4		G	12288	557068	1737196	0.171654	0.17346	0.198359
GAGGA	2542	9895	90	0.00079782	0.00113342	0.00128249	0.684812	0.178268	25769	35022	25986	0.00051538	0.00070044	0.00051972	0.630427	62	0.694346	57	1.30314	5
UUUUC	13986	26239	333	0.00438958	0.00300553	0.00474521	0.11239	0.658852	101452	81134	100588	0.00202904	0.00162268	0.00201176	1.11329	6	0.889242	15	1.23801	6
UAUGU	6282	7820	326	0.00197164	0.000895738	0.00464546	1.23643	2.37467	97852	82367	98941	0.00195704	0.00164734	0.00197882	0.010722	479	-0.87899	990	1.23118	7
CUUUU	12700	22041	316	0.00398596	0.00252467	0.00450296	0.175947	0.834777	101237	81262	101035	0.00202474	0.00162524	0.0020207	0.977191	9	0.635445	74	1.15602	8
UACUA	5165	8276	318	0.00162106	0.00094797	0.00453146	1.48304	2.25706	101586	85074	101794	0.00203172	0.00170148	0.00203588	-0.325762	835	-0.843877	981	1.15432	9
GAAAA	13948	26587	297	0.00437765	0.00304539	0.00423222	-0.0487444	0.474785	98364	88978	98930	0.00196728	0.00177956	0.0019786	1.15396	5	0.775108	38	1.09693	10
GGAAA	6103	15970	147	0.00191546	0.00182928	0.00209473	0.129077	0.195494	50593	55532	51117	0.00101186	0.00111064	0.00102234	0.92068	13	0.719881	52	1.03489	11
UAACA	4952	11180	286	0.00155421	0.00128061	0.00407547	1.39078	1.67014	101241	87942	101649	0.00202482	0.00175884	0.00203298	-0.381611	878	-0.457796	807	1.00337	12
AACAG	3774	11674	145	0.00118449	0.00133719	0.00206623	0.802738	0.627797	52258	56002	51691	0.00104516	0.00112004	0.00103382	0.180542	314	0.255656	292	0.999018	13
UUUCC	6324	15523	147	0.00198482	0.00177807	0.00209473	0.0777578	0.236451	53874	52250	52849	0.00107748	0.001045	0.00105698	0.881348	18	0.766812	41	0.986818	14
UUUUG	9913	24109	271	0.00311125	0.00276155	0.00386172	0.31175	0.483764	97630	80570	97870	0.0019526	0.0016114	0.0019574	0.672097	48	0.777165	37	0.980305	15
GGAGG	1290	5684	37	0.000404873	0.000651071	0.000527246	0.381005	-0.304339	13421	21677	13425	0.00026842	0.00043354	0.0002685	0.592978	70	0.586649	98	0.973554	16
AGGAA	5335	14120	140	0.00167442	0.00161737	0.00199498	0.252718	0.302729	50645	55279	50897	0.0010129	0.00110558	0.00101794	0.725168	37	0.548844	109	0.970725	17
UUACU	5746	10283	272	0.00180341	0.00117786	0.00387597	1.10383	1.71839	101572	83140	101166	0.00203144	0.0016628	0.00202332	-0.171773	666	-0.497446	833	0.937833	18
GGAAG	3236	10747	69	0.00101564	0.00123101	0.000983242	-0.0467643	-0.324223	25890	34942	26093	0.0005178	0.00069884	0.00052186	0.971916	10	0.816808	32	0.913884	19
GAAAG	5376	14257	135	0.00168729	0.00163306	0.00192373	0.189205	0.236332	50991	55584	51132	0.00101982	0.00111168	0.00102264	0.72639	36	0.554837	106	0.911611	20
UUUCU	11869	24339	266	0.00372515	0.0027879	0.00379047	0.0250788	0.443199	101653	81116	100878	0.00203306	0.00162232	0.00201756	0.873645	21	0.781119	35	0.909765	21
AAAAA	35298	33443	509	0.0110785	0.00383071	0.00725319	-0.61107	0.921004	190676	143182	193324	0.00381352	0.00286364	0.00386648	1.53856	1	0.419762	159	0.907595	22
AGAAA	11840	24233	259	0.00371605	0.00277576	0.00369072	-0.00986602	0.411022	97660	89320	98892	0.0019532	0.0017864	0.00197784	0.927929	12	0.635826	73	0.899977	23
UGAAA	8932	23224	255	0.00280336	0.00266018	0.00363372	0.374293	0.449923	97928	86894	99074	0.00195856	0.00173788	0.00198148	0.517361	99	0.614196	82	0.874869	24
UUUAC	6397	12215	259	0.00200773	0.00139916	0.00369072	0.878336	1.39934	101100	83206	100795	0.002022	0.00166412	0.0020159	-0.0102162	501	-0.250198	662	0.872478	25
GUGGA	1854	7995	68	0.000581888	0.000915783	0.000968992	0.735744	0.0814793	25901	34270	26482	0.00051802	0.0006854	0.00052964	0.167733	322	0.41806	160	0.871473	26
AUGUU	5236	13198	252	0.00164335	0.00151176	0.00359097	1.12774	1.24815	98190	82913	98480	0.0019638	0.00165826	0.0019696	-0.257012	759	-0.133443	574	0.866471	27
AAGAA	11686	29510	252	0.00366771	0.00338021	0.00359097	-0.0305065	0.0872624	98339	89332	99295	0.00196678	0.00178664	0.0019859	0.899045	16	0.919863	10	0.854581	28
CCUUU	5843	13227	134	0.00183386	0.00151508	0.00190948	0.0583028	0.33379	53321	52070	53147	0.00106642	0.0010414	0.00106294	0.782105	26	0.540869	112	0.845123	29
GAGAA	5060	13196	129	0.00158811	0.00151153	0.00183824	0.211013	0.282313	50301	55539	51219	0.00100602	0.00111078	0.00102438	0.65865	52	0.444435	148	0.84357	30
AUUUU	16029	29569	476	0.00503079	0.00338697	0.00678295	0.431128	1.00192	191244	129303	191602	0.00382488	0.00258606	0.00383204	0.395369	167	0.389237	180	0.823799	31
AGCAG	2585	9333	66	0.000811316	0.00106904	0.000940492	0.213153	-0.184832	26999	35047	26972	0.00053998	0.00070094	0.00053944	0.587358	71	0.608958	85	0.801954	32
AUGAA	6835	19424	241	0.0021452	0.00222491	0.00343422	0.678871	0.626235	97887	87355	99401	0.00195774	0.0017471	0.00198802	0.131923	357	0.348786	208	0.788651	33
GAAGA	5497	22556	123	0.00172526	0.00258366	0.00175274	0.0227929	-0.55981	50473	55867	50766	0.00100946	0.00111734	0.00101532	0.773232	29	1.20935	2	0.787674	34
AGAGG	2393	8519	63	0.000751056	0.000975804	0.000897743	0.257382	-0.12029	25826	34695	26174	0.00051652	0.0006939	0.00052348	0.540096	84	0.491864	128	0.778168	35
UGGAA	4338	17721	119	0.0013615	0.00202984	0.00169574	0.316711	-0.259456	50304	54292	50811	0.00100608	0.00108584	0.00101622	0.436456	145	0.902556	12	0.738699	36
GGCGC	884	2437	17	0.000277448	0.000279145	0.000242248	-0.195733	-0.204529	7431	13691	7261	0.00014862	0.00027382	0.00014522	0.900589	15	0.0277862	446	0.738245	37
UCUUU	10331	24623	235	0.00324244	0.00282043	0.00334872	0.0465318	0.247697	101314	81438	100777	0.00202628	0.00162876	0.00201554	0.678246	46	0.79214	34	0.732445	38
UGUUU	7901	16980	229	0.00247977	0.00194497	0.00326322	0.396091	0.746554	97779	80560	98350	0.00195558	0.0016112	0.001967	0.34261	201	0.271609	278	0.730301	39
GCAAA	4775	13359	122	0.00149866	0.0015302	0.00173849	0.214159	0.184112	51594	56295	52405	0.00103188	0.0011259	0.0010481	0.538397	87	0.442641	149	0.730055	40
UUUGA	6834	23994	229	0.00214489	0.00274838	0.00326322	0.605396	0.247717	98072	82718	98374	0.00196144	0.00165436	0.00196748	0.128988	360	0.732308	50	0.729949	41
GUUUU	8431	17548	228	0.00264611	0.00201003	0.00324897	0.296109	0.69277	98425	80641	98320	0.0019685	0.00161282	0.0019664	0.426778	154	0.317629	238	0.724427	42
GAGGG	1329	3897	31	0.000417114	0.00044638	0.000441746	0.0827781	-0.0150531	13416	21814	13378	0.00026832	0.00043628	0.00026756	0.636486	60	0.0330174	444	0.723356	43
CAGGA	1809	7618	62	0.000567764	0.0008726	0.000883493	0.637927	0.0178985	26587	34800	26772	0.00053174	0.000696	0.00053544	0.0945708	394	0.326233	229	0.722494	44
AGGGG	1337	2886	31	0.000419624	0.000330575	0.000441746	0.0741197	0.41824	13308	21603	13397	0.00026616	0.00043206	0.00026794	0.656805	54	-0.386253	749	0.721309	45
GGGAA	2669	7543	60	0.00083768	0.000864009	0.000854993	0.0295142	-0.0151333	26015	34481	26164	0.0005203	0.00068962	0.00052328	0.687055	44	0.325245	230	0.70833	46
CAAGA	4295	16460	119	0.00134801	0.0018854	0.00169574	0.331082	-0.15296	52249	56239	52472	0.00104498	0.00112478	0.00104944	0.367354	183	0.745229	46	0.692292	47
UGCAG	2365	8152	60	0.000742268	0.000933766	0.000854993	0.203973	-0.127149	27120	34072	26581	0.0005424	0.00068144	0.00053162	0.452582	136	0.454475	141	0.685517	48
AAAAG	12761	22479	224	0.00400511	0.00257485	0.00319197	-0.327392	0.309963	97994	89451	99727	0.00195988	0.00178902	0.00199454	1.03108	8	0.525316	118	0.678393	49
AAGGA	4941	14243	114	0.00155076	0.00163146	0.00162449	0.0670098	-0.00617662	50506	55425	50929	0.00101012	0.0011085	0.00101858	0.618448	64	0.557552	105	0.673425	50
CCGCC	963	2922	17	0.000302243	0.000334699	0.000242248	-0.319222	-0.466379	7800	14097	7600	0.000156	0.00028194	0.000152	0.954161	11	0.247476	297	0.672414	51
GGGAG	1115	3711	30	0.000349949	0.000425075	0.000427497	0.28877	0.00819711	13276	21963	13450	0.00026552	0.00043926	0.000269	0.398323	166	-0.0473594	501	0.668307	52
GGAGA	2209	7905	58	0.000693306	0.000905474	0.000826493	0.25351	-0.13167	25934	34926	26128	0.00051868	0.00069852	0.00052256	0.418648	157	0.374372	189	0.661407	53
UGCCA	2321	10059	61	0.000728458	0.0011522	0.000869243	0.254914	-0.406563	27825	34456	27503	0.0005565	0.00068912	0.00055006	0.388464	172	0.741568	47	0.660171	54
AGAAG	5358	18157	113	0.00168164	0.00207978	0.00161024	-0.0625928	-0.36916	50399	55817	51022	0.00100798	0.00111634	0.00102044	0.738399	35	0.897657	13	0.658082	55
UUCUC	5109	13201	118	0.00160349	0.0015121	0.00168149	0.068525	0.153182	53934	52069	53327	0.00107868	0.00104138	0.00106654	0.571945	73	0.538058	115	0.656799	56
GUGCA	2138	4930	59	0.000671023	0.000564704	0.000840743	0.325304	0.57417	26809	34276	26683	0.00053618	0.00068552	0.00053366	0.323644	213	-0.279703	680	0.655744	57
UUUCA	9120	22968	222	0.00286236	0.00263086	0.00316347	0.144305	0.265977	101244	83254	100977	0.00202488	0.00166508	0.00201954	0.499369	113	0.659942	68	0.647483	58
AACAA	8271	21272	223	0.0025959	0.00243659	0.00317772	0.291761	0.383131	101394	90369	101823	0.00202788	0.00180738	0.00203646	0.356261	190	0.430964	155	0.641931	59
UGUGG	1896	7697	57	0.00059507	0.000881649	0.000812244	0.448854	-0.118292	25954	33088	26030	0.00051908	0.00066176	0.0005206	0.197101	302	0.413896	163	0.641737	60
UUUUA	13419	18812	416	0.00421162	0.00215481	0.00592795	0.493157	1.45997	190383	129117	190958	0.00380766	0.00258234	0.00381916	0.145472	343	-0.261118	668	0.634279	61
UCUUC	5461	22144	116	0.00171396	0.00253647	0.00165299	-0.0522613	-0.617748	53655	52418	53403	0.0010731	0.00104836	0.00106806	0.675552	47	1.27469	1	0.630082	62
GGCAA	2512	9004	58	0.000788404	0.00103136	0.000826493	0.0680674	-0.319471	26774	34594	26706	0.00053548	0.00069188	0.00053412	0.558103	79	0.575952	101	0.629839	63
AUGUG	3244	7126	110	0.00101815	0.000816244	0.00156749	0.622509	0.941382	50487	52687	50869	0.00100974	0.00105374	0.00101738	0.0119613	476	-0.368447	739	0.623595	64
UGAGG	1930	7101	56	0.000605741	0.00081338	0.000797994	0.397677	-0.0275528	26126	34175	26047	0.00052252	0.0006835	0.00052094	0.213214	292	0.250989	293	0.61526	65
CUUUC	5631	14386	114	0.00176732	0.00164784	0.00162449	-0.121578	-0.0205891	53718	51828	53236	0.00107436	0.00103656	0.00106472	0.718085	39	0.66877	65	0.60951	66
UUUGC	4735	13393	111	0.0014861	0.00153409	0.00158174	0.0899743	0.0441231	52535	51753	51905	0.0010507	0.00103506	0.0010381	0.500185	112	0.567673	103	0.607565	67
UUCUU	11668	29257	215	0.00366206	0.00335123	0.00306373	-0.25737	-0.129403	101370	80836	100776	0.0020274	0.00161672	0.00201552	0.853026	24	1.05162	3	0.604135	68
UGUGC	2189	5099	57	0.000687029	0.000584062	0.000812244	0.241541	0.47579	26862	33109	26721	0.00053724	0.00066218	0.00053442	0.354805	192	-0.181101	613	0.603938	69
GCAAG	2520	7711	57	0.000790915	0.000883252	0.000812244	0.0383891	-0.120913	27081	35158	26813	0.00054162	0.00070316	0.00053626	0.546242	83	0.328973	227	0.59898	70
GCGCA	1292	2753	30	0.000405501	0.000315341	0.000427497	0.0762074	0.439	14159	21676	14125	0.00028318	0.00043352	0.0002825	0.517986	98	-0.459186	809	0.597662	71
UGCGC	1267	2809	30	0.000397655	0.000321755	0.000427497	0.104397	0.409948	13976	21364	14164	0.00027952	0.00042728	0.00028328	0.508564	105	-0.409217	772	0.593684	72
GAUGC	1871	7281	56	0.000587223	0.000833998	0.000797994	0.442468	-0.0636672	26668	33745	26518	0.00053336	0.0006749	0.00053036	0.138799	349	0.305371	251	0.589405	73
GAAGG	2790	10070	55	0.000875656	0.00115346	0.000783744	-0.159983	-0.557518	25996	34990	26119	0.00051992	0.0006998	0.00052238	0.752075	31	0.720957	51	0.585282	74
GAAUG	3308	10544	107	0.00103823	0.00120776	0.00152474	0.554431	0.336231	50585	54400	50850	0.0010117	0.001088	0.001017	0.037349	451	0.150651	373	0.584241	75
UCUGC	2311	8246	57	0.00072532	0.000944534	0.000812244	0.163296	-0.21769	27754	33341	27185	0.00055508	0.00066682	0.0005437	0.385921	174	0.502305	124	0.579101	76
AAUGA	6546	18530	208	0.0020545	0.00212251	0.00296398	0.528749	0.481763	98498	87211	99363	0.00196996	0.00174422	0.00198726	0.0606186	422	0.283189	271	0.576753	77
GAAAU	7196	19441	207	0.0022585	0.00222686	0.00294973	0.385215	0.405571	97594	87178	98941	0.00195188	0.00174356	0.00197882	0.210502	296	0.352974	204	0.575941	78
CGAGG	1195	3355	29	0.000375057	0.000384297	0.000413247	0.139893	0.104783	13843	21901	13863	0.00027686	0.00043802	0.00027726	0.437953	143	-0.188776	623	0.575764	79
UUGAA	7344	25843	206	0.00230495	0.00296017	0.00293548	0.348857	-0.0120866	98714	85084	98609	0.00197428	0.00170168	0.00197218	0.223411	285	0.798722	33	0.573803	80
GUACG	1544	3484	55	0.000484593	0.000399073	0.000783744	0.69361	0.97373	27055	33863	26435	0.0005411	0.00067726	0.0005287	-0.159123	654	-0.763057	951	0.567933	81
GGGGG	727	1861	14	0.000228173	0.000213167	0.000199498	-0.193749	-0.0956086	6913	13358	6743	0.00013826	0.00026716	0.00013486	0.722743	38	-0.325718	709	0.564915	82
AAAGA	10517	24462	206	0.00330082	0.00280199	0.00293548	-0.169228	0.0671446	98005	89089	99340	0.0019601	0.00178178	0.0019868	0.751895	32	0.653131	69	0.563148	83
GCCAA	2374	10449	57	0.000745092	0.00119688	0.000812244	0.124493	-0.559288	27658	35031	27636	0.00055316	0.00070062	0.00055272	0.429723	152	0.772569	39	0.555363	84
UCUCC	2315	8040	58	0.000726575	0.000920938	0.000826493	0.185892	-0.1561	28572	33715	28318	0.00057144	0.0006743	0.00056636	0.34651	199	0.449713	144	0.545284	85
GGCUG	1209	4855	28	0.000379451	0.000556113	0.000398997	0.0724635	-0.479002	13852	21267	13723	0.00027704	0.00042534	0.00027446	0.453819	135	0.386763	183	0.539781	86
AGGGA	2143	5930	53	0.000672592	0.000679249	0.000755244	0.167211	0.153003	26564	34739	25988	0.00053128	0.00069478	0.00051976	0.340259	203	-0.0326163	493	0.539097	87
AAAGG	5813	13526	104	0.00182444	0.00154933	0.00148199	-0.29992	-0.0641091	50328	56031	51179	0.00100656	0.00112062	0.00102358	0.858021	23	0.467346	136	0.53391	88
GAGAG	2228	6281	53	0.00069927	0.000719454	0.000755244	0.111094	0.0700407	25949	34743	26405	0.00051898	0.00069486	0.0005281	0.43017	151	0.0501797	432	0.516132	89
UGGCG	1256	4902	28	0.000394202	0.000561497	0.000398997	0.0174413	-0.492901	13753	21530	13952	0.00027506	0.0004306	0.00027904	0.51919	97	0.38293	184	0.515905	90
UGAAC	2910	11052	105	0.000913319	0.00126595	0.00149624	0.712149	0.241124	52333	54595	52332	0.00104666	0.0010919	0.00104664	-0.196602	688	0.213375	312	0.515574	91
GCAGU	2176	6515	54	0.000682949	0.000746257	0.000769494	0.172132	0.0442368	26698	33932	26917	0.00053396	0.00067864	0.00053834	0.355046	191	0.137026	379	0.515392	92
CUCCC	1270	3725	30	0.000398596	0.000426678	0.000427497	0.100985	0.00276468	15089	21470	14980	0.00030178	0.0004294	0.0002996	0.401431	163	-0.00917399	478	0.512875	93
CGCAA	2020	5065	55	0.000633988	0.000580168	0.000783744	0.305927	0.433912	27929	35496	27495	0.00055858	0.00070992	0.0005499	0.182691	312	-0.291186	690	0.511213	94
UUCUG	4131	14463	105	0.00129654	0.00165666	0.00149624	0.206677	-0.146935	52116	51954	52509	0.00104232	0.00103908	0.00105018	0.314864	223	0.672968	62	0.510703	95
GAAAC	4110	12644	104	0.00128995	0.0014483	0.00148199	0.200224	0.0331732	52076	56326	52067	0.00104152	0.00112652	0.00104134	0.308619	225	0.362488	197	0.509093	96
UGAGA	3445	9383	101	0.00108123	0.00107477	0.00143924	0.41263	0.421277	50594	54178	50809	0.00101188	0.00108356	0.00101618	0.0956371	392	-0.0117501	481	0.50215	97
UUCCC	2858	7528	56	0.000896998	0.000862291	0.000797994	-0.168728	-0.111797	28443	33578	28215	0.00056886	0.00067156	0.0005643	0.657032	53	0.360658	200	0.499915	98
AAGGG	2809	6866	52	0.000881619	0.000786462	0.000740994	-0.250694	-0.0859156	25989	34550	26228	0.00051978	0.000691	0.00052456	0.762255	30	0.186692	334	0.498354	99
AGCAA	4286	13147	103	0.00134518	0.00150592	0.00146774	0.125792	-0.0370467	51833	56051	52075	0.00103666	0.00112102	0.0010415	0.37586	180	0.425829	156	0.494932	100
CCAUG	1463	7410	54	0.00045917	0.000848775	0.000769494	0.744881	-0.141472	27508	34271	27342	0.00055016	0.00068542	0.00054684	-0.260822	767	0.308393	247	0.492791	101
CCAGG	915	4800	28	0.000287178	0.000549813	0.000398997	0.474434	-0.462565	14223	22165	14182	0.00028446	0.0004433	0.00028364	0.0137173	475	0.310659	244	0.492316	102
CCACC	1359	7134	29	0.000426529	0.00081716	0.000413247	-0.0456416	-0.983616	15131	21999	14733	0.00030262	0.00043998	0.00029466	0.495138	114	0.893181	14	0.487952	103
CCAUC	1961	9377	55	0.00061547	0.00107408	0.000783744	0.348693	-0.454652	28505	34297	28022	0.0005701	0.00068594	0.00056044	0.110474	381	0.646952	70	0.483822	104
UGUGU	3611	6689	99	0.00113333	0.000766188	0.00141074	0.315881	0.880681	50580	51867	50482	0.0010116	0.00103734	0.00100964	0.163931	325	-0.437119	787	0.48261	105
GAUGA	4058	16962	100	0.00127362	0.0019429	0.00142499	0.16201	-0.447264	50743	54032	51020	0.00101486	0.00108064	0.0010204	0.327659	209	0.846328	27	0.481816	106
GUUUC	4230	12556	102	0.00132761	0.00143822	0.00145349	0.130691	0.0152348	51945	51797	52060	0.0010389	0.00103594	0.0010412	0.353772	193	0.473344	134	0.481272	107
AGGAU	2972	10129	100	0.000932778	0.00116022	0.00142499	0.611345	0.296551	50695	54273	51117	0.0010139	0.00108546	0.00102234	-0.12031	608	0.096093	403	0.479075	108
GCAAC	2134	7654	54	0.000669767	0.000876723	0.000769494	0.20025	-0.188212	27745	34844	27660	0.0005549	0.00069688	0.0005532	0.271432	247	0.331211	224	0.476109	109
AUGCG	1679	3779	52	0.000526963	0.000432864	0.000740994	0.49176	0.77555	27013	33767	26666	0.00054026	0.00067534	0.00053332	-0.0359522	528	-0.641702	905	0.474461	110
CUGGG	900	4739	27	0.00028247	0.000542826	0.000384747	0.445813	-0.496581	13889	21265	13879	0.00027778	0.0004253	0.00027758	0.0241536	468	0.35201	205	0.471006	111
UGGAG	1894	9437	51	0.000594442	0.00108096	0.000726744	0.289912	-0.572788	26100	34022	26220	0.000522	0.00068044	0.0005244	0.187486	309	0.667768	66	0.47078	112
CAAUG	3401	13433	101	0.00106742	0.00153868	0.00143924	0.431175	-0.0963836	52163	54551	52191	0.00104326	0.00109102	0.00104382	0.0330316	457	0.496012	127	0.463433	113
CCCCC	839	1827	15	0.000263325	0.000209273	0.000213748	-0.300929	0.0305285	8070	13835	7766	0.0001614	0.0002767	0.00015532	0.706202	41	-0.402938	767	0.460669	114
CCAAG	2061	10985	53	0.000646856	0.00125827	0.000755244	0.223499	-0.736428	27875	34671	27512	0.0005575	0.00069342	0.00055024	0.214472	291	0.859641	23	0.456882	115
ACCAG	1605	8913	53	0.000503738	0.00102093	0.000755244	0.58427	-0.434876	27951	34967	27560	0.00055902	0.00069934	0.0005512	-0.150227	642	0.545825	111	0.454367	116
GGCUU	2057	7142	51	0.0006456	0.000818077	0.000726744	0.170806	-0.170788	26728	33039	26655	0.00053456	0.00066078	0.0005331	0.272289	246	0.308066	248	0.447041	117
CUGAA	3591	12501	100	0.00112705	0.00143192	0.00142499	0.338393	-0.0070009	52406	54380	52267	0.00104812	0.0010876	0.00104534	0.104753	385	0.396803	172	0.446978	118
CAUUU	7340	18360	193	0.0023037	0.00210304	0.00275023	0.2556	0.387077	101375	82722	100998	0.0020275	0.00165444	0.00201996	0.184249	311	0.346131	212	0.445225	119
AAGAG	4759	14016	98	0.00149364	0.00160546	0.00139649	-0.0970257	-0.201178	50495	55494	51340	0.0010099	0.00110988	0.0010268	0.564617	75	0.532579	116	0.443649	120
AGUGG	2063	7518	50	0.000647483	0.000861145	0.000712494	0.138035	-0.273378	25887	33825	26227	0.00051774	0.0006765	0.00052454	0.322615	215	0.348167	209	0.441826	121
UUGAG	3293	11068	97	0.00103353	0.00126778	0.00138224	0.419433	0.124705	50249	53311	50887	0.00100498	0.00106622	0.00101774	0.040407	447	0.249797	294	0.441638	122
AUGAG	3217	8759	96	0.00100967	0.00100329	0.00136799	0.438169	0.447311	50906	54086	50506	0.00101812	0.00108172	0.00101012	-0.0120204	503	-0.108581	550	0.43753	123
CCCCA	1136	4603	28	0.00035654	0.000527248	0.000398997	0.162315	-0.402105	15206	22308	14755	0.00030412	0.00044616	0.0002951	0.229422	278	0.240921	302	0.435173	124
UUGUG	3374	9428	95	0.00105895	0.00107993	0.00135374	0.354319	0.326018	50390	51519	50246	0.0010078	0.00103038	0.00100492	0.0714219	414	0.0677549	423	0.429869	125
UGCAA	4096	12244	98	0.00128555	0.00140248	0.00139649	0.119417	-0.00617869	51975	54472	52091	0.0010395	0.00108944	0.00104182	0.306497	230	0.364396	196	0.422698	126
AAAUG	7386	18365	186	0.00231813	0.00210361	0.00265048	0.193288	0.333386	97977	87052	98941	0.00195954	0.00174104	0.00197882	0.24245	267	0.272917	276	0.421613	127
GUGUG	2170	4118	49	0.000681066	0.000471694	0.000698244	0.0359377	0.565881	26133	33244	26133	0.00052266	0.00066488	0.00052266	0.381922	176	-0.495242	830	0.417859	128
CAAAA	9900	24049	192	0.00310717	0.00275468	0.00273598	-0.183543	-0.00982799	101340	90028	102449	0.0020268	0.00180056	0.00204898	0.616396	65	0.613439	83	0.417151	129
UAUUU	14266	21144	358	0.00447746	0.00242193	0.00510146	0.18823	1.07475	190698	129355	191110	0.00381396	0.0025871	0.0038222	0.231391	276	-0.0951797	537	0.416507	130
ACAAG	3583	11463	98	0.00112454	0.00131302	0.00139649	0.312465	0.0889116	51912	55821	52329	0.00103824	0.00111642	0.00104658	0.115199	373	0.234013	303	0.416121	131
ACUUU	7026	16535	189	0.00220515	0.00189399	0.00269323	0.288462	0.507906	101487	82760	101143	0.00202974	0.0016552	0.00202286	0.11958	370	0.194425	332	0.41294	132
AAGCA	4426	11636	97	0.00138912	0.00133284	0.00138224	-0.00716774	0.0525041	51521	56330	51978	0.00103042	0.0011266	0.00103956	0.430942	150	0.242528	300	0.411034	133
UUGCA	3963	12199	97	0.00124381	0.00139733	0.00138224	0.152243	-0.0156636	52007	53089	51989	0.00104014	0.00106178	0.00103978	0.257987	254	0.396186	173	0.410729	134
UUGGC	2480	10412	50	0.000778361	0.00119264	0.000712494	-0.127561	-0.743205	26796	32995	26810	0.00053592	0.0006599	0.0005362	0.538422	86	0.853836	25	0.410107	135
UGGGA	1696	7871	49	0.000532299	0.000901579	0.000698244	0.391497	-0.368723	25964	34041	26289	0.00051928	0.00068082	0.00052578	0.0357229	455	0.405181	169	0.409273	136
CGUUU	3787	8360	96	0.00118857	0.000957592	0.00136799	0.20283	0.514574	52420	51962	51791	0.0010484	0.00103924	0.00103582	0.181037	313	-0.118046	559	0.401283	137
CCAUU	3633	14532	99	0.00114024	0.00166456	0.00141074	0.307118	-0.23869	53687	53359	53443	0.00107374	0.00106718	0.00106886	0.086688	402	0.641338	71	0.400378	138
GCCCC	738	2373	14	0.000231625	0.000271814	0.000199498	-0.215415	-0.446243	7967	13605	7568	0.00015934	0.0002721	0.00015136	0.539684	85	-0.00151708	474	0.398393	139
GCACA	2238	5028	51	0.000702408	0.00057593	0.000726744	0.0491382	0.335555	27640	35180	27664	0.0005528	0.0007036	0.00055328	0.345552	200	-0.288863	688	0.393438	140
UGAUG	3535	15141	93	0.00110948	0.00173432	0.00132524	0.256371	-0.388115	50455	52973	50519	0.0010091	0.00105946	0.00101038	0.136812	352	0.711039	54	0.391355	141
UUCCU	5371	13835	98	0.00168572	0.00158472	0.00139649	-0.271558	-0.182426	53610	52035	53236	0.0010722	0.0010407	0.00106472	0.652788	55	0.606676	88	0.39133	142
CUUCA	3976	16742	98	0.00124789	0.0019177	0.00139649	0.162315	-0.457576	53868	53426	53263	0.00107736	0.00106852	0.00106526	0.211989	293	0.843766	30	0.390598	143
CAGCG	1249	4276	26	0.000392005	0.000489792	0.000370497	-0.0814109	-0.402708	14237	22120	14152	0.00028474	0.0004424	0.00028304	0.461228	130	0.146818	374	0.388456	144
UUUGU	7812	17870	180	0.00245184	0.00204691	0.00256498	0.065084	0.3255	98194	80544	98027	0.00196388	0.00161088	0.00196054	0.320156	216	0.345598	214	0.387696	145
UGCUC	2061	6757	50	0.000646856	0.000773977	0.000712494	0.139435	-0.119412	27648	33325	27241	0.00055296	0.0006665	0.00054482	0.226269	280	0.215686	311	0.387099	146
AACUU	5590	16625	187	0.00175445	0.0019043	0.00266473	0.602969	0.484727	101038	85092	101911	0.00202076	0.00170184	0.00203822	-0.203878	694	0.162167	363	0.386679	147
ACGAG	1425	4615	49	0.000447244	0.000528623	0.000698244	0.642671	0.401494	26816	34895	26710	0.00053632	0.0006979	0.0005342	-0.262033	770	-0.400782	764	0.386352	148
CGAGA	1702	4411	49	0.000534182	0.000505256	0.000698244	0.386402	0.466719	26575	35048	26711	0.0005315	0.00070096	0.00053422	0.00726076	485	-0.472319	820	0.386298	149
CGUGG	976	3670	25	0.000306323	0.000420378	0.000356247	0.217826	-0.238809	13795	21074	13640	0.0002759	0.00042148	0.0002728	0.150907	338	-0.00377634	476	0.385035	150
CGCCA	1351	4975	26	0.000424018	0.000569859	0.000370497	-0.194665	-0.621142	14770	22182	14249	0.0002954	0.00044364	0.00028498	0.521457	94	0.361215	199	0.378601	151
GGAAU	3320	10765	93	0.001042	0.00123307	0.00132524	0.346898	0.103997	50676	54762	50979	0.00101352	0.00109524	0.00101958	0.03998	448	0.171009	351	0.378278	152
UCAUU	6495	18347	185	0.00203849	0.00210155	0.00263623	0.370975	0.327024	101561	82911	101457	0.00203122	0.00165822	0.00202914	0.00515434	488	0.341817	215	0.377607	153
AACAU	5280	13486	185	0.00165716	0.00154475	0.00263623	0.669766	0.771105	101378	87540	101600	0.00202756	0.0017508	0.002032	-0.291035	803	-0.180644	611	0.375575	154
CUGUG	1962	6138	49	0.000615784	0.000703074	0.000698244	0.181308	-0.00994429	26608	33027	26917	0.00053216	0.00066054	0.00053834	0.210564	295	0.0900305	407	0.375215	155
GCCAU	2042	8768	50	0.000640892	0.00100433	0.000712494	0.152796	-0.495277	27497	34210	27484	0.00054994	0.0006842	0.00054968	0.220808	288	0.553737	107	0.374286	156
GAGCA	2035	6837	49	0.000638695	0.000783141	0.000698244	0.128604	-0.165539	26608	34772	27090	0.00053216	0.00069544	0.0005418	0.263268	252	0.171345	350	0.365972	157
CAGAA	4254	14707	94	0.00133514	0.00168461	0.00133949	0.00469168	-0.330728	51944	55969	52025	0.00103888	0.00111938	0.0010405	0.361962	188	0.589711	95	0.364406	158
CUUCC	3122	10687	51	0.000979856	0.00122414	0.000726744	-0.431122	-0.752245	28633	33564	28264	0.00057266	0.00067128	0.00056528	0.774891	28	0.866778	22	0.362482	159
UUCCA	4214	17579	96	0.00132259	0.00201358	0.00136799	0.0486951	-0.557704	53668	53486	53211	0.00107336	0.00106972	0.00106422	0.301228	232	0.912528	11	0.36226	160
CCCUU	2972	6725	51	0.000932778	0.000770312	0.000726744	-0.360086	-0.0839944	28796	33545	28310	0.00057592	0.0006709	0.0005662	0.695665	42	0.199344	324	0.360136	161
UGAAU	5348	16815	178	0.0016785	0.00192607	0.00253648	0.595657	0.397171	98410	85337	98814	0.0019682	0.00170674	0.00197628	-0.229706	726	0.174413	347	0.36004	162
UGAGC	1844	5997	48	0.000578749	0.000686923	0.000683995	0.241047	-0.00616396	26602	34004	26726	0.00053204	0.00068008	0.00053452	0.121403	365	0.0144443	459	0.355741	163
GAAGC	2692	9153	48	0.000844898	0.00104843	0.000683995	-0.304793	-0.616168	26700	35112	26751	0.000534	0.00070224	0.00053502	0.661938	50	0.578188	100	0.354392	164
UUGCC	2516	9285	49	0.00078966	0.00106355	0.000698244	-0.177499	-0.607078	27714	33143	27357	0.00055428	0.00066286	0.00054714	0.510616	101	0.682105	60	0.351822	165
ACAGC	2089	7063	49	0.000655644	0.000809028	0.000698244	0.0908202	-0.212457	27687	35036	27480	0.00055374	0.00070072	0.0005496	0.243703	263	0.207351	319	0.34535	166
UCCUU	4959	13759	95	0.00155641	0.00157602	0.00135374	-0.201271	-0.219334	53967	52069	53305	0.00107934	0.00104138	0.0010661	0.528071	91	0.597787	93	0.344607	167
CAGCA	2462	11158	49	0.000772712	0.00127809	0.000698244	-0.146198	-0.872182	27927	35590	27539	0.00055854	0.0007118	0.00055078	0.46827	127	0.844442	29	0.342256	168
UGUGA	3057	7371	90	0.000959456	0.000844307	0.00128249	0.418659	0.603107	50480	53289	50794	0.0010096	0.00106578	0.00101588	-0.0734959	565	-0.33607	718	0.336217	169
GGCCC	795	2947	13	0.000249515	0.000337563	0.000185249	-0.429664	-0.865693	7764	13661	7345	0.00015528	0.00027322	0.0001469	0.684254	45	0.305092	252	0.334628	170
CCGUG	922	2840	25	0.000289375	0.000325306	0.000356247	0.29994	0.13108	14216	21422	14163	0.00028432	0.00042844	0.00028326	0.0254225	465	-0.397294	759	0.330752	171
UUCAA	7534	25407	178	0.00236459	0.00291023	0.00253648	0.10124	-0.198306	101774	84750	100916	0.00203548	0.001695	0.00201832	0.216218	290	0.779849	36	0.329673	172
UGCUG	2617	11098	47	0.000821359	0.00127121	0.000669745	-0.294402	-0.924524	27101	33204	26728	0.00054202	0.00066408	0.00053456	0.599667	68	0.936779	9	0.325259	173
GCUUU	4767	11902	91	0.00149615	0.00136331	0.00129674	-0.206364	-0.072223	52191	51836	51755	0.00104382	0.00103672	0.0010351	0.51938	96	0.395085	176	0.325119	174
GCUGG	1257	6251	24	0.000394516	0.000716017	0.000341997	-0.206099	-1.06601	13883	20977	13662	0.00027766	0.00041954	0.00027324	0.506765	106	0.771186	40	0.323816	175
UCCAU	3242	12877	94	0.00101752	0.00147499	0.00133949	0.396628	-0.139021	53907	53121	53741	0.00107814	0.00106242	0.00107482	-0.0834891	578	0.47335	133	0.317588	176
AUUGC	3436	10738	91	0.00107841	0.00122998	0.00129674	0.265987	0.0762557	52257	53173	52089	0.00104514	0.00106346	0.00104178	0.0452051	444	0.209867	316	0.315838	177
UUCAU	6718	19810	177	0.00210848	0.00226913	0.00252223	0.258497	0.152563	101077	83051	101346	0.00202154	0.00166102	0.00202692	0.0607484	421	0.450067	143	0.315411	178
GUGGC	1336	5290	24	0.000419311	0.00060594	0.000341997	-0.294035	-0.825191	13819	21602	13778	0.00027638	0.00043204	0.00027556	0.601366	67	0.488011	129	0.311618	179
CACCC	1414	4042	26	0.000443791	0.000462989	0.000370497	-0.26042	-0.321515	14902	22188	14930	0.00029804	0.00044376	0.0002986	0.574376	72	0.0611975	428	0.311248	180
CAACC	1787	7520	49	0.000560859	0.000861374	0.000698244	0.316093	-0.302908	28272	35337	28148	0.00056544	0.00070674	0.00056296	-0.0117349	502	0.285461	269	0.3107	181
CCAGC	1217	6078	25	0.000381962	0.000696201	0.000356247	-0.10055	-0.966626	14747	21895	14383	0.00029494	0.0004379	0.00028766	0.373007	181	0.668903	64	0.308514	182
AGGCA	2201	6818	47	0.000690795	0.000780964	0.000669745	-0.0446474	-0.221645	26831	34933	27070	0.00053662	0.00069866	0.0005414	0.364358	186	0.160666	365	0.306916	183
CACCA	2250	12000	49	0.000706174	0.00137453	0.000698244	-0.0162923	-0.977138	28760	35386	28251	0.0005752	0.00070772	0.00056502	0.295961	234	0.957692	8	0.30543	184
AAAAU	16361	29493	335	0.00513499	0.00337826	0.00477371	-0.105249	0.498831	189977	139427	193368	0.00379954	0.00278854	0.00386736	0.434536	146	0.27677	274	0.303762	185
UUAUU	12783	20176	330	0.00401201	0.00231105	0.00470246	0.229091	1.02487	190177	129330	190925	0.00380354	0.0025866	0.0038185	0.0769831	410	-0.162509	599	0.30041	186
CCACG	997	3746	25	0.000312914	0.000429084	0.000356247	0.187114	-0.26838	14693	22095	14503	0.00029386	0.0004419	0.00029006	0.0906358	398	-0.0424613	498	0.296527	187
GGAAC	1843	7562	46	0.000578435	0.000866185	0.000655495	0.180429	-0.402091	26802	35236	26713	0.00053604	0.00070472	0.00053426	0.109815	382	0.297625	258	0.295042	188
UCCCU	2429	5716	48	0.000762354	0.000654736	0.000683995	-0.156477	0.0630711	28462	33477	27977	0.00056924	0.00066954	0.00055954	0.421425	156	-0.0322566	492	0.289744	189
UGUUA	4922	11001	169	0.0015448	0.0012601	0.00240823	0.640558	0.934431	98910	83440	98503	0.0019782	0.0016688	0.00197006	-0.356772	858	-0.405269	769	0.289734	190
AGAGA	4196	12008	87	0.00131694	0.00137545	0.00123974	-0.0871483	-0.149866	50665	55505	50805	0.0010133	0.0011101	0.0010161	0.378125	178	0.309214	246	0.286995	191
AAAGC	4643	11930	89	0.00145723	0.00136652	0.00126824	-0.200401	-0.107674	52296	55811	52020	0.00104592	0.00111622	0.0010404	0.478456	121	0.29188	263	0.285689	192
CAUUG	3360	13611	89	0.00105455	0.00155906	0.00126824	0.266195	-0.297853	52459	52929	52074	0.00104918	0.00105858	0.00104148	0.00737034	484	0.558551	104	0.284192	193
GAACG	1726	5556	46	0.000541714	0.000636409	0.000655495	0.275052	0.0426299	27153	35102	26924	0.00054306	0.00070204	0.00053848	-0.00357972	492	-0.141599	577	0.283691	194
GAACU	2829	9818	89	0.000887897	0.0011246	0.00126824	0.514364	0.173419	52242	54644	52118	0.00104484	0.00109288	0.00104236	-0.234819	735	0.0412738	439	0.282974	195
AACCA	3103	13079	92	0.000973893	0.00149813	0.00131099	0.428821	-0.192504	53824	56409	53947	0.00107648	0.00112818	0.00107894	-0.144486	639	0.409163	165	0.281042	196
CACAG	1946	6166	47	0.000610762	0.000706281	0.000669745	0.133	-0.0766315	27832	35269	27590	0.00055664	0.00070538	0.0005518	0.133867	355	0.00184199	469	0.279466	197
UUCAG	3603	12413	88	0.00113082	0.00142184	0.00125399	0.149156	-0.181234	52073	52931	51729	0.00104146	0.00105862	0.00103458	0.118763	371	0.425575	157	0.277481	198
GUGAG	1672	4272	44	0.000524766	0.000489334	0.000626995	0.25678	0.357634	26402	33939	25897	0.00052804	0.00067878	0.00051794	-0.00897296	499	-0.472125	819	0.275669	199
AGGAG	2113	7187	44	0.000663176	0.000823231	0.000626995	-0.0809383	-0.392844	25969	34627	25922	0.00051938	0.00069254	0.00051844	0.352602	195	0.2494	295	0.274277	200
GGGGC	731	2271	12	0.000229428	0.00026013	0.000170999	-0.424058	-0.605251	7024	13599	7071	0.00014048	0.00027198	0.00014142	0.707678	40	-0.0642651	513	0.273999	201
AUGGG	1565	7109	44	0.000491183	0.000814297	0.000626995	0.352192	-0.377101	26105	33935	25957	0.0005221	0.0006787	0.00051914	-0.0880641	583	0.26278	286	0.27233	202
AAUGC	3565	9669	89	0.00111889	0.00110753	0.00126824	0.180754	0.195481	52558	54914	52580	0.00105116	0.00109828	0.0010516	0.0900911	400	0.0121005	460	0.270242	203
CUUUG	3899	16205	88	0.00122372	0.00185619	0.00125399	0.0352503	-0.565821	52024	51418	52003	0.00104048	0.00102836	0.00104006	0.234026	274	0.852001	26	0.269859	204
AAUUU	11417	27646	324	0.00358329	0.0031667	0.00461696	0.365661	0.543966	190631	132513	191747	0.00381262	0.00265026	0.00383494	-0.0894997	585	0.256845	289	0.26774	205
GGGCA	1282	4238	23	0.000402362	0.000485439	0.000327747	-0.295911	-0.566707	13882	21743	13626	0.00027764	0.00043486	0.00027252	0.53528	89	0.15874	366	0.266222	206
CUCUU	4796	13985	90	0.00150525	0.0016019	0.00128249	-0.231056	-0.320841	54159	52273	53325	0.00108318	0.00104546	0.0010665	0.47473	123	0.61565	81	0.266063	207
AGAUG	3306	12009	86	0.00103761	0.00137556	0.00122549	0.240101	-0.166665	50978	54462	51049	0.00101956	0.00108924	0.00102098	0.0253114	466	0.336702	220	0.263404	208
GAGAU	2856	8884	85	0.000896371	0.00101761	0.00121124	0.434318	0.251296	50413	54196	50623	0.00100826	0.00108392	0.00101246	-0.1697	662	-0.0910692	532	0.25862	209
CUUCU	5325	17953	90	0.00167128	0.00205642	0.00128249	-0.382006	-0.681185	54077	51484	53613	0.00108154	0.00102968	0.00107226	0.627866	63	0.997937	5	0.258293	210
CAGGC	1144	4097	24	0.00035905	0.000469289	0.000341997	-0.0702017	-0.456491	14291	21939	14298	0.00028582	0.00043878	0.00028596	0.32908	208	0.0969779	402	0.258171	211
GGACG	794	3518	23	0.000249201	0.000402967	0.000327747	0.395274	-0.298079	13844	21551	13704	0.00027688	0.00043102	0.00027408	-0.151951	644	-0.0970916	539	0.257987	212
AAAAC	8135	17557	170	0.00255321	0.00201106	0.00242248	-0.0758285	0.268531	101390	89821	101372	0.0020278	0.00179642	0.00202744	0.332398	207	0.162829	360	0.256826	213
UGAAG	4141	16989	85	0.00129967	0.001946	0.00121124	-0.101665	-0.684024	50689	54340	50747	0.00101378	0.0010868	0.00101494	0.358406	189	0.840422	31	0.255091	214
CAUGA	2647	8560	87	0.000830775	0.000980501	0.00123974	0.577508	0.338447	52380	54636	52069	0.0010476	0.00109272	0.00104138	-0.334558	843	-0.156333	592	0.251541	215
CGGGA	834	2664	23	0.000261755	0.000305146	0.000327747	0.324366	0.103082	13703	21924	13804	0.00027406	0.00043848	0.00027608	-0.0662731	560	-0.523009	845	0.247498	216
CUCCU	2134	7034	47	0.000669767	0.000805706	0.000669745	-4.84581e-05	-0.266642	28526	33348	28209	0.00057052	0.00066696	0.00056418	0.231382	277	0.272653	277	0.247456	217
AUGCC	1845	6158	46	0.000579063	0.000705365	0.000655495	0.178864	-0.105785	27716	34388	27613	0.00055432	0.00068776	0.00055226	0.0630012	419	0.0364644	443	0.247237	218
GCCAC	1318	5206	24	0.000413661	0.000596318	0.000341997	-0.274465	-0.802098	14906	21982	14429	0.00029812	0.00043964	0.00028858	0.472557	125	0.43976	150	0.245013	219
AUGCA	3684	8948	87	0.00115624	0.00102494	0.00123974	0.100593	0.274493	52176	54495	52316	0.00104352	0.0010899	0.00104632	0.147986	342	-0.0886508	530	0.244714	220
AUUUC	7361	19276	168	0.00231029	0.00220796	0.00239398	0.0513385	0.116698	100738	83174	101057	0.00201476	0.00166348	0.00202114	0.197465	301	0.408509	166	0.244242	221
CGGAG	935	3139	23	0.000293455	0.000359555	0.000327747	0.159447	-0.133629	13752	21749	13858	0.00027504	0.00043498	0.00027716	0.0934962	396	-0.274736	677	0.241865	222
GGCGG	950	2987	12	0.000298163	0.000342144	0.000170999	-0.802114	-1.00062	7077	13632	7231	0.00014154	0.00027264	0.00014462	1.07489	7	0.327608	228	0.241718	223
UAUGC	3095	6507	86	0.000971382	0.000745341	0.00122549	0.335248	0.717387	52047	53266	51903	0.00104094	0.00106532	0.00103806	-0.0997762	589	-0.515315	840	0.239469	224
CCUUC	2838	9904	47	0.000890721	0.00113445	0.000669745	-0.411363	-0.760308	28428	33744	28468	0.00056856	0.00067488	0.00056936	0.647661	56	0.749288	45	0.23427	225
AUGCU	3107	9578	86	0.000975148	0.00109711	0.00122549	0.329665	0.159655	52493	53247	52190	0.00104986	0.00106494	0.0010438	-0.106503	596	0.042932	436	0.231514	226
GAAUA	6117	13098	164	0.00191985	0.0015003	0.00233698	0.283651	0.639392	98187	86911	99531	0.00196374	0.00173822	0.00199062	-0.0326083	524	-0.212356	640	0.231428	227
GAACA	3647	11632	87	0.00114463	0.00133238	0.00123974	0.115156	-0.103969	52301	55658	52843	0.00104602	0.00111316	0.00105686	0.129971	359	0.259346	287	0.230253	228
AGGGC	1284	3910	23	0.00040299	0.000447869	0.000327747	-0.29816	-0.450492	13776	21749	13981	0.00027552	0.00043498	0.00027962	0.548588	82	0.0421273	438	0.229117	229
UUGCU	4342	13034	85	0.00136276	0.00149297	0.00121124	-0.170046	-0.301703	51943	51754	51679	0.00103886	0.00103508	0.00103358	0.39153	170	0.528445	117	0.228835	230
CUGCG	1217	3417	23	0.000381962	0.000391398	0.000327747	-0.220844	-0.256054	14094	21360	13986	0.00028188	0.0004272	0.00027972	0.438347	142	-0.126274	568	0.228601	231
AACGA	3121	9432	86	0.000979542	0.00108038	0.00122549	0.323179	0.181816	51854	55845	52301	0.00103708	0.0011169	0.00104602	-0.0823475	574	-0.0479566	503	0.228449	232
GCGUU	1914	4659	44	0.000600719	0.000533663	0.000626995	0.0617637	0.232526	26909	33307	26768	0.00053818	0.00066614	0.00053536	0.158601	330	-0.319897	703	0.227945	233
GGGGA	1200	3507	22	0.000376626	0.000401707	0.000313497	-0.26468	-0.357691	13482	21738	13395	0.00026964	0.00043476	0.0002679	0.482099	118	-0.114074	554	0.226759	234
ACCAU	2871	12150	88	0.000901078	0.00139172	0.00125399	0.476801	-0.150338	54251	54454	53814	0.00108502	0.00108908	0.00107628	-0.267997	778	0.353754	203	0.220472	235
CAACA	4081	15222	87	0.00128084	0.0017436	0.00123974	-0.0470563	-0.492028	53702	56331	53515	0.00107404	0.00112662	0.0010703	0.254046	258	0.630065	77	0.212022	236
GAGGU	1731	6006	42	0.000543283	0.000687954	0.000598495	0.139635	-0.200973	26186	33537	25840	0.00052372	0.00067074	0.0005168	0.0529094	434	0.0365586	442	0.211734	237
ACAAA	7579	17641	166	0.00237871	0.00202068	0.00236548	-0.00804521	0.227294	101717	89945	102337	0.00203434	0.0017989	0.00204674	0.225618	282	0.167725	355	0.208806	238
CAAGG	2274	9266	43	0.000713707	0.00106137	0.000612745	-0.220045	-0.792567	26411	34891	26537	0.00052822	0.00069782	0.00053074	0.434193	147	0.605	90	0.207282	239
GCAGC	1691	6943	23	0.000530729	0.000795282	0.000327747	-0.695392	-1.27888	14203	21960	14227	0.00028406	0.0004392	0.00028454	0.90178	14	0.856589	24	0.203953	240
AUUGA	5514	18246	159	0.0017306	0.00208998	0.00226573	0.388707	0.116489	97703	84446	98514	0.00195406	0.00168892	0.00197028	-0.175204	673	0.307387	249	0.201576	241
UUUAU	12964	18078	308	0.00406882	0.00207073	0.00438896	0.10927	1.08374	190634	129632	191062	0.00381268	0.00259264	0.00382124	0.0938049	395	-0.324279	707	0.19984	242
UUGUU	8401	21181	158	0.0026367	0.00242617	0.00225148	-0.227857	-0.107804	97985	80079	98082	0.0019597	0.00160158	0.00196164	0.4281	153	0.599183	91	0.198815	243
UCACC	2054	8577	45	0.000644659	0.000982448	0.000641245	-0.00766022	-0.615506	28551	34425	27971	0.00057102	0.0006885	0.00055942	0.174994	319	0.512924	120	0.196944	244
CAGUU	3188	10306	84	0.00100057	0.0011805	0.00119699	0.258589	0.0200193	51978	53362	52218	0.00103956	0.00106724	0.00104436	-0.0551501	548	0.145508	375	0.196793	245
GAUUU	5269	18166	158	0.0016537	0.00208081	0.00225148	0.445174	0.113726	98182	83049	98280	0.00196364	0.00166098	0.0019656	-0.24783	751	0.325114	231	0.195905	246
AUGGA	3230	12681	81	0.00101375	0.00145254	0.00115424	0.187239	-0.331632	50296	54418	50404	0.00100592	0.00108836	0.00100808	0.0111899	477	0.41642	161	0.195334	247
AGAGC	2026	6843	43	0.000635871	0.000783828	0.000612745	-0.0534466	-0.35525	26854	34762	26776	0.00053708	0.00069524	0.00053552	0.243597	264	0.173026	349	0.194347	248
UACCA	3126	12914	86	0.000981112	0.00147923	0.00122549	0.32087	-0.271485	53836	54733	53558	0.00107672	0.00109466	0.00107116	-0.134154	626	0.434361	153	0.194185	249
AGCAC	2059	6130	44	0.000646228	0.000702158	0.000626995	-0.0435893	-0.163341	27650	35077	27404	0.000553	0.00070154	0.00054808	0.224764	284	0.00126948	470	0.194067	250
CCCGC	779	1679	12	0.000244493	0.00019232	0.000170999	-0.51581	-0.169525	7878	14004	7491	0.00015756	0.00028008	0.00014982	0.633893	61	-0.542329	856	0.190755	251
GAGGC	1203	4860	22	0.000377568	0.000556686	0.000313497	-0.268282	-0.82841	13718	21374	13734	0.00027436	0.00042748	0.00027468	0.460666	131	0.381007	187	0.190702	252
CAAUU	5759	18553	162	0.00180749	0.00212514	0.00230848	0.352955	0.119384	101450	85623	101442	0.002029	0.00171246	0.00202884	-0.166779	659	0.31149	243	0.186289	253
UCUCU	4367	11969	85	0.00137061	0.00137098	0.00121124	-0.178329	-0.178725	53860	52218	53333	0.0010772	0.00104436	0.00106666	0.347528	197	0.392591	177	0.183385	254
CCAAA	4031	18015	86	0.00126515	0.00206352	0.00122549	-0.0459502	-0.751747	53628	56520	54022	0.00107256	0.0011304	0.00108044	0.238251	271	0.868273	20	0.18174	255
GAUGG	1769	9165	41	0.00055521	0.0010498	0.000584245	0.0735408	-0.845468	26077	34000	25755	0.00052154	0.00068	0.0005151	0.0902556	399	0.626508	78	0.181722	256
ACGCA	1900	4132	44	0.000596325	0.000473298	0.000626995	0.0723551	0.405706	27552	35306	27652	0.00055104	0.00070612	0.00055304	0.113942	377	-0.577165	878	0.18107	257
UAACU	4183	8671	161	0.00131286	0.000993215	0.00229423	0.805302	1.20783	101382	85054	101250	0.00202764	0.00170108	0.002025	-0.627092	990	-0.776273	956	0.180089	258
AACUA	4764	9416	161	0.00149521	0.00107855	0.00229423	0.617666	1.08892	101042	86912	101423	0.00202084	0.00173824	0.00202846	-0.43461	923	-0.688533	926	0.177626	259
GUUGA	3412	12103	80	0.00107087	0.00138633	0.00113999	0.0902333	-0.28225	50468	52948	50588	0.00100936	0.00105896	0.00101176	0.0853481	403	0.388624	181	0.172155	260
GCACC	1306	5140	23	0.000409895	0.000588759	0.000327747	-0.32267	-0.845092	14789	21972	14550	0.00029578	0.00043944	0.000291	0.47073	126	0.42201	158	0.171565	261
ACCAA	3382	15832	85	0.00106146	0.00181347	0.00121124	0.190437	-0.582266	53740	56202	53826	0.0010748	0.00112404	0.00107652	-0.0180202	509	0.690058	58	0.17011	262
GGAUU	2510	9948	80	0.000787777	0.00113949	0.00113999	0.533164	0.000636099	50479	53229	50660	0.00100958	0.00106458	0.0010132	-0.357897	859	0.0981018	401	0.170103	263
GUUAC	2786	6743	82	0.000874401	0.000772373	0.00116849	0.41828	0.597276	52048	53089	51941	0.00104096	0.00106178	0.00103882	-0.251548	753	-0.459115	808	0.1697	264
UGAUU	5052	15200	155	0.0015856	0.00174108	0.00220873	0.478193	0.343239	98641	82313	98255	0.00197282	0.00164626	0.0019651	-0.315233	824	0.0807869	414	0.168616	265
CGUGC	1074	2332	22	0.000337081	0.000267118	0.000313497	-0.10464	0.230978	14249	21349	13948	0.00028498	0.00042698	0.00027896	0.242233	268	-0.676693	920	0.168396	266
GCAAU	3501	10735	82	0.00109881	0.00122963	0.00116849	0.0887078	-0.0735838	51989	54925	51993	0.00103978	0.0010985	0.00103986	0.0796601	407	0.162695	361	0.168257	267
GUUUG	3561	12160	80	0.00111764	0.00139286	0.00113999	0.0285685	-0.289029	50606	51583	50764	0.00101212	0.00103166	0.00101528	0.143073	346	0.433083	154	0.167145	268
UUUCG	3943	9627	82	0.00123753	0.00110272	0.00116849	-0.0828188	0.0835802	52157	52173	52084	0.00104314	0.00104346	0.00104168	0.246532	261	0.0796907	416	0.165734	269
GUGGG	1146	4167	21	0.000359678	0.000477307	0.000299248	-0.265367	-0.673577	13635	21229	13344	0.0002727	0.00042458	0.00026688	0.399392	164	0.16888	354	0.165149	270
GCUGA	2060	7420	42	0.000646542	0.00084992	0.000598495	-0.111404	-0.505987	26918	33968	26692	0.00053836	0.00067936	0.00053384	0.264173	251	0.323151	233	0.164932	271
GCGAA	1841	4720	42	0.000577808	0.00054065	0.000598495	0.0507507	0.146645	26676	34820	26703	0.00053352	0.0006964	0.00053406	0.115047	374	-0.365222	736	0.164338	272
GUUGC	2085	7692	42	0.000654388	0.000881076	0.000598495	-0.128807	-0.557927	26983	33689	26708	0.00053966	0.00067378	0.00053416	0.278096	242	0.386989	182	0.164068	273
AGGCU	1705	5756	42	0.000535123	0.000659318	0.000598495	0.161469	-0.139635	26927	34224	26739	0.00053854	0.00068448	0.00053478	-0.00918235	500	-0.054034	506	0.162394	274
GCAGA	2346	8434	42	0.000736304	0.000966068	0.000598495	-0.298963	-0.690785	26443	34985	26745	0.00052886	0.0006997	0.0005349	0.477417	122	0.465388	137	0.162071	275
AAUGG	3568	14540	80	0.00111984	0.00166548	0.00113999	0.0257353	-0.546913	50220	54167	50944	0.0010044	0.00108334	0.00101888	0.156953	332	0.620449	79	0.162038	276
UGCAC	2115	5002	43	0.000663804	0.000572951	0.000612745	-0.11547	0.0968742	27729	34333	27435	0.00055458	0.00068666	0.0005487	0.259361	253	-0.261183	669	0.159269	277
CGAAA	3794	9505	82	0.00119077	0.00108875	0.00116849	-0.0272448	0.10198	52265	55856	52318	0.0010453	0.00111712	0.00104636	0.187974	308	-0.0371179	496	0.159267	278
AACGC	1916	4897	43	0.000601347	0.000560924	0.000612745	0.0270901	0.127481	27577	35353	27456	0.00055154	0.00070706	0.00054912	0.124731	363	-0.334027	715	0.158166	279
UCCCG	904	2752	23	0.000283725	0.000315226	0.000327747	0.20809	0.056196	14724	21610	14700	0.00029448	0.0004322	0.000294	-0.0536756	546	-0.455311	804	0.156768	280
CCUGU	1879	6090	43	0.000589734	0.000697576	0.000612745	0.0552226	-0.187063	27844	33304	27491	0.00055688	0.00066608	0.00054982	0.082698	405	0.0666545	426	0.156328	281
GGAUG	1714	8058	41	0.000537948	0.000922999	0.000584245	0.119108	-0.659755	26055	33688	26230	0.0005211	0.00067376	0.0005246	0.0459063	442	0.454095	142	0.155356	282
AGCCA	2025	8219	43	0.000635557	0.000941441	0.000612745	-0.0527343	-0.619584	27862	35378	27562	0.00055724	0.00070756	0.00055124	0.189723	306	0.412018	164	0.152606	283
ACUGA	2788	8437	81	0.000875028	0.000966412	0.00115424	0.399542	0.256234	51924	54470	51949	0.00103848	0.0010894	0.00103898	-0.247072	748	-0.172824	604	0.151776	284
AAACA	7807	16771	159	0.00245027	0.00192103	0.00226573	-0.112962	0.238101	100536	89959	102092	0.00201072	0.00179918	0.00204184	0.285227	240	0.094537	404	0.150107	285
GGGCC	739	2807	11	0.000231939	0.000321526	0.000156749	-0.565292	-1.03648	7177	13710	7064	0.00014354	0.0002742	0.00014128	0.692293	43	0.229708	305	0.149897	286
AAGUG	3573	9046	79	0.0011214	0.00103617	0.00112574	0.0055677	0.119615	50536	54066	50764	0.00101072	0.00108132	0.00101528	0.149924	340	-0.0615339	510	0.148997	287
AAAGU	6980	16448	154	0.00219071	0.00188403	0.00219448	0.00248237	0.220061	97767	87296	99236	0.00195534	0.00174592	0.00198472	0.163979	324	0.109832	397	0.144945	288
CCUCU	2484	8387	44	0.000779616	0.000960684	0.000626995	-0.314311	-0.615609	28517	33377	28387	0.00057034	0.00066754	0.00056774	0.450942	137	0.525208	119	0.143224	289
CAAGC	2118	7355	43	0.000664745	0.000842475	0.000612745	-0.117515	-0.459346	27561	35023	27802	0.00055122	0.00070046	0.00055604	0.270174	248	0.26633	285	0.140098	290
CAAAC	3475	12272	83	0.00109065	0.00140569	0.00118274	0.116949	-0.249145	53618	56298	53711	0.00107236	0.00112596	0.00107422	0.024395	467	0.320123	235	0.138844	291
UGUAC	3049	6557	80	0.000956945	0.000751068	0.00113999	0.252515	0.602007	52236	53662	51787	0.00104472	0.00107324	0.00103574	-0.126609	617	-0.514957	839	0.13836	292
UGUUG	4129	15010	78	0.00129591	0.00171931	0.00111149	-0.221467	-0.629335	50728	51471	50507	0.00101456	0.00102942	0.00101014	0.35311	194	0.74	48	0.137941	293
UGCUU	4309	11799	80	0.0013524	0.00135151	0.00113999	-0.246502	-0.24555	52422	52148	51820	0.00104844	0.00104296	0.0010364	0.36728	184	0.373889	190	0.137441	294
GAAUU	4764	17679	153	0.00149521	0.00202503	0.00218023	0.544137	0.106538	98309	84647	99226	0.00196618	0.00169294	0.00198452	-0.395051	894	0.258414	288	0.135692	295
AGCGU	1632	4444	41	0.000512212	0.000509036	0.000584245	0.189834	0.198808	26606	34175	26600	0.00053212	0.0006835	0.000532	-0.0550112	547	-0.425175	782	0.135148	296
CAUUC	3333	10483	82	0.00104608	0.00120077	0.00116849	0.159654	-0.0393132	53924	53383	53228	0.00107848	0.00106766	0.00106456	-0.0440068	537	0.169507	352	0.134389	297
AUUUG	5830	20432	151	0.00182978	0.00234037	0.00215173	0.233832	-0.121239	98167	82424	98082	0.00196334	0.00164848	0.00196164	-0.101643	592	0.505602	122	0.133439	298
GCGGA	1213	3299	21	0.000380706	0.000377882	0.000299248	-0.347339	-0.336597	13976	21835	13653	0.00027952	0.0004367	0.00027306	0.445727	140	-0.208706	638	0.132122	299
AUAUG	6492	11257	151	0.00203755	0.00128943	0.00215173	0.0786646	0.738769	98469	84644	98266	0.00196938	0.00169288	0.00196532	0.0490928	440	-0.39275	757	0.130735	300
CCCAU	1746	7270	43	0.000547991	0.000832738	0.000612745	0.161134	-0.442576	28713	34618	28001	0.00057426	0.00069236	0.00056002	-0.0675511	561	0.266341	284	0.129809	301
ACCUG	1526	6727	42	0.000478943	0.000770541	0.000598495	0.321485	-0.364531	27948	34400	27393	0.00055896	0.000688	0.00054786	-0.222891	717	0.163462	359	0.127532	302
GAUUG	2639	9512	77	0.000828264	0.00108955	0.00109724	0.405718	0.0101523	50086	52944	50294	0.00100172	0.00105888	0.00100588	-0.274317	785	0.0411893	440	0.125423	303
UGUUC	3622	11481	79	0.00113678	0.00131509	0.00112574	-0.0140829	-0.224281	52489	51733	51671	0.00104978	0.00103466	0.00103342	0.114871	375	0.345999	213	0.123448	304
AUACU	5328	9709	155	0.00167222	0.00111211	0.00220873	0.401453	0.989916	101108	85532	101381	0.00202216	0.00171064	0.00202762	-0.274132	784	-0.621234	893	0.123431	305
UAUGA	4770	10387	151	0.00149709	0.00118977	0.00215173	0.523338	0.854812	98359	84967	98783	0.00196718	0.00169934	0.00197566	-0.393968	892	-0.514288	838	0.123164	306
CAGUG	2029	6824	41	0.000636812	0.000781651	0.000584245	-0.124294	-0.419951	26953	34084	26878	0.00053906	0.00068168	0.00053756	0.240422	270	0.197431	326	0.120148	307
UACAG	2919	7546	80	0.000916144	0.000864353	0.00113999	0.315377	0.399331	51707	54399	52528	0.00103414	0.00108798	0.00105056	-0.174786	672	-0.33196	714	0.117864	308
CAGAG	1774	7613	41	0.000556779	0.000872027	0.000584245	0.0694689	-0.577799	26803	34564	26939	0.00053606	0.00069128	0.00053878	0.0547109	432	0.335103	221	0.116878	309
AAACU	5873	15973	154	0.00184327	0.00182962	0.00219448	0.251612	0.262338	101347	87903	101467	0.00202694	0.00175806	0.00202934	-0.137034	631	0.0575588	429	0.11287	310
UGCAU	3615	8953	79	0.00113459	0.00102552	0.00112574	-0.011292	0.134524	52016	53465	52095	0.00104032	0.0010693	0.0010419	0.12514	362	-0.0603158	507	0.111658	311
UUGAU	5992	19626	149	0.00188062	0.00224805	0.00212323	0.175054	-0.0824112	98204	82919	98282	0.00196408	0.00165838	0.00196564	-0.0626447	556	0.438899	151	0.111264	312
AACCU	2704	8903	81	0.000848665	0.00101979	0.00115424	0.443678	0.178673	53801	54762	53474	0.00107602	0.00109524	0.00106948	-0.342438	849	-0.102976	544	0.110035	313
AUGAU	5101	16354	149	0.00160098	0.00187326	0.00212323	0.407311	0.180711	98458	85239	98496	0.00196916	0.00170478	0.00196992	-0.298629	808	0.135966	380	0.108126	314
CAAAU	5946	20438	153	0.00186618	0.00234106	0.00218023	0.224391	-0.10268	100959	87742	101318	0.00201918	0.00175484	0.00202636	-0.113679	601	0.415822	162	0.105592	315
ACAUU	5458	12619	153	0.00171302	0.00144544	0.00218023	0.347938	0.592977	101461	85553	101373	0.00202922	0.00171106	0.00202746	-0.244382	743	-0.243385	658	0.104809	316
UAUUG	5960	15522	148	0.00187058	0.00177796	0.00210898	0.173064	0.246325	98016	82440	98122	0.00196032	0.0016488	0.00196244	-0.0676055	562	0.108806	398	0.103899	317
AAAUU	11326	27524	290	0.00355472	0.00315272	0.00413247	0.217265	0.390405	191064	136356	192274	0.00382128	0.00272712	0.00384548	-0.104318	594	0.20922	317	0.10384	318
CGUCC	819	3450	22	0.000257047	0.000395178	0.000313497	0.286419	-0.33405	14619	21258	14603	0.00029238	0.00042516	0.00029206	-0.18581	680	-0.105502	547	0.102189	319
UGGCC	1283	6234	21	0.000402676	0.00071407	0.000299248	-0.428281	-1.25473	14387	21383	13987	0.00028774	0.00042766	0.00027974	0.484855	117	0.739602	49	0.0972531	320
GUGAU	2874	8542	76	0.00090202	0.000978439	0.00108299	0.26379	0.146468	50553	53191	50651	0.00101106	0.00106382	0.00101302	-0.164637	658	-0.1207	563	0.096359	321
GUGCU	2147	6245	40	0.000673847	0.00071533	0.000569995	-0.241471	-0.327659	26650	33104	26689	0.000533	0.00066208	0.00053378	0.338286	205	0.111604	394	0.0947051	322
GUGAA	3570	9960	76	0.00112046	0.00114086	0.00108299	-0.0490737	-0.0751037	50408	54052	50722	0.00100816	0.00108104	0.00101444	0.152371	337	0.0777055	419	0.0943382	323
UGGCA	2504	10035	40	0.000785894	0.00114945	0.000569995	-0.463384	-1.01193	26601	33919	26699	0.00053202	0.00067838	0.00053398	0.562853	76	0.760783	43	0.0941647	324
UUCGA	2809	9315	78	0.000881619	0.00106698	0.00111149	0.334268	0.058961	51803	53174	52151	0.00103606	0.00106348	0.00104302	-0.23288	733	0.00474254	467	0.0917296	325
AUAGC	2954	6747	78	0.000927128	0.000772832	0.00111149	0.261655	0.524271	52161	54521	52198	0.00104322	0.00109042	0.00104396	-0.170202	663	-0.496658	831	0.09043	326
CGCCG	815	2222	11	0.000255792	0.000254518	0.000156749	-0.706517	-0.699313	7460	13876	7367	0.0001492	0.00027752	0.00014734	0.777724	27	-0.124825	566	0.0893048	327
ACAGG	1785	6023	40	0.000560232	0.000689901	0.000569995	0.0249269	-0.27544	26793	35080	26805	0.00053586	0.0007016	0.0005361	0.0641674	418	-0.0242587	489	0.0884482	328
CAAGU	2943	10602	78	0.000923676	0.0012144	0.00111149	0.267038	-0.127748	52683	54417	52303	0.00105366	0.00108834	0.00104606	-0.189951	685	0.158115	368	0.0875308	329
AAUUG	5721	18291	147	0.00179557	0.00209513	0.00209473	0.222328	-0.00027519	97786	84985	98606	0.00195572	0.0016997	0.00197212	-0.123261	611	0.301762	254	0.0870192	330
CUCUG	1838	7346	41	0.000576866	0.000841444	0.000584245	0.0183381	-0.526292	27843	33255	27515	0.00055686	0.0006651	0.0005503	0.0509215	436	0.339295	218	0.086356	331
CAUCC	1775	8240	42	0.000557093	0.000943846	0.000598495	0.103421	-0.657212	28740	34590	28237	0.0005748	0.0006918	0.00056474	-0.0451416	539	0.448197	146	0.0837529	332
UUGGA	3192	16990	76	0.00100183	0.00194611	0.00108299	0.11239	-0.845572	50743	52916	51100	0.00101486	0.00105832	0.001022	-0.0186487	511	0.878818	17	0.0836265	333
UGGCU	2038	8395	40	0.000639637	0.000961601	0.000569995	-0.166303	-0.754488	26795	33086	26908	0.0005359	0.00066172	0.00053816	0.25529	255	0.539217	113	0.0829152	334
UCCCC	1292	3451	22	0.000405501	0.000395293	0.000313497	-0.371252	-0.334468	15206	21485	14843	0.00030412	0.0004297	0.00029686	0.415065	159	-0.120408	562	0.0786712	335
GAACC	1570	7510	41	0.000492753	0.000860229	0.000584245	0.24571	-0.558146	27761	35027	27713	0.00055522	0.00070054	0.00055426	-0.172196	667	0.296253	259	0.0760114	336
AAGAU	5626	18483	146	0.00176575	0.00211713	0.00208048	0.236638	-0.025188	98352	87485	98687	0.00196704	0.0017497	0.00197374	-0.155745	650	0.274999	275	0.0759868	337
ACAUG	2717	7045	77	0.000852745	0.000806966	0.00109724	0.363695	0.443301	52131	54659	52071	0.00104262	0.00109318	0.00104142	-0.290028	802	-0.437952	789	0.0753287	338
GCUUC	2605	9210	41	0.000817593	0.00105495	0.000584245	-0.484809	-0.852535	27745	33163	27741	0.0005549	0.00066326	0.00055482	0.559155	78	0.669534	63	0.0745545	339
UUACC	3383	9834	79	0.00106177	0.00112643	0.00112574	0.0844004	-0.000883095	54061	53437	53562	0.00108122	0.00106874	0.00107124	-0.0261856	518	0.0758471	421	0.0715932	340
UCGAA	2763	9452	77	0.000867182	0.00108267	0.00109724	0.339474	0.0192814	51975	54688	52349	0.0010395	0.00109376	0.00104698	-0.261483	768	-0.0146969	486	0.0676468	341
CAAAG	4061	15943	77	0.00127457	0.00182618	0.00109724	-0.216126	-0.73495	52178	56366	52427	0.00104356	0.00112732	0.00104854	0.288493	239	0.695934	56	0.0654988	342
GUACA	3020	6565	76	0.000947843	0.000751984	0.00108299	0.192302	0.526247	51882	54277	51785	0.00103764	0.00108554	0.0010357	-0.130586	621	-0.529638	850	0.0644155	343
CAUGG	1467	7418	39	0.000460426	0.000849691	0.000555746	0.271456	-0.612514	26727	33942	26586	0.00053454	0.00067884	0.00053172	-0.21533	707	0.323866	232	0.0637578	344
UUAUG	5001	9910	145	0.00156959	0.00113514	0.00206623	0.396615	0.864139	98328	82324	98864	0.00196656	0.00164648	0.00197728	-0.325286	834	-0.53652	854	0.0634861	345
AAAUA	14500	21006	283	0.0045509	0.00240612	0.00403272	-0.1744	0.745043	190749	139850	193048	0.00381498	0.002797	0.00386096	0.254477	257	-0.217171	643	0.0627928	346
CUGUU	3824	11557	76	0.00120018	0.00132379	0.00108299	-0.148232	-0.289653	51954	51500	51847	0.00103908	0.00103	0.00103694	0.207947	297	0.36203	198	0.0626893	347
CAUGC	1786	5005	40	0.000560546	0.000573295	0.000569995	0.0241189	-0.00832746	27636	34079	27358	0.00055272	0.00068158	0.00054716	0.0202827	472	-0.249605	661	0.0589876	348
AGAAU	5885	17237	145	0.00184704	0.0019744	0.00206623	0.16179	0.0655868	97808	87511	99348	0.00195616	0.00175022	0.00198696	-0.0828106	576	0.17388	348	0.0564404	349
ACGCC	1068	3497	21	0.000335197	0.000400562	0.000299248	-0.163671	-0.420686	14594	22206	14405	0.00029188	0.00044412	0.0002881	0.199636	300	-0.148924	586	0.05477	350
AGUUU	6096	15674	143	0.00191326	0.00179537	0.00203773	0.0909313	0.182684	98223	82552	98096	0.00196446	0.00165104	0.00196192	-0.0380986	531	0.120906	388	0.0546993	351
GGGAU	1335	5341	38	0.000418997	0.000611782	0.000541496	0.370011	-0.176068	26034	33762	26074	0.00052068	0.00067524	0.00052148	-0.313458	822	-0.142383	578	0.0543379	352
UCAAG	3508	13461	76	0.001101	0.00154188	0.00108299	-0.0237984	-0.509672	52565	54314	52153	0.0010513	0.00108628	0.00104306	0.0666457	417	0.505297	123	0.0541996	353
AGAAC	3603	11227	76	0.00113082	0.00128599	0.00108299	-0.0623483	-0.247859	52013	56135	52156	0.00104026	0.0011227	0.00104312	0.120426	367	0.195908	329	0.0541166	354
CACGA	1373	4320	40	0.000430923	0.000494832	0.000569995	0.403519	0.204011	27682	34725	27500	0.00055364	0.0006945	0.00055	-0.361517	861	-0.489036	827	0.0515188	355
ACGAC	1266	5088	40	0.000397341	0.000582802	0.000569995	0.520574	-0.0320561	27569	34808	27532	0.00055138	0.00069616	0.00055064	-0.47267	940	-0.256412	665	0.049841	356
GACAA	3206	11289	76	0.00100622	0.00129309	0.00108299	0.106076	-0.255804	51693	56373	52370	0.00103386	0.00112746	0.0010474	-0.0390951	533	0.197749	325	0.0482092	357
AUUGG	2889	13560	74	0.000906728	0.00155322	0.00105449	0.217806	-0.558717	50507	53149	51072	0.00101014	0.00106298	0.00102144	-0.155814	651	0.54715	110	0.0459431	358
GGACA	1524	6361	39	0.000478315	0.000728617	0.000555746	0.216462	-0.390737	26479	34771	26934	0.00052958	0.00069542	0.00053868	-0.146886	640	0.0672768	424	0.044996	359
AAGGC	2437	8032	39	0.000764865	0.000920021	0.000555746	-0.460781	-0.727243	26955	34965	27010	0.0005391	0.0006993	0.0005402	0.504653	108	0.395756	174	0.0409309	360
UUCAC	3677	10050	77	0.00115405	0.00115117	0.00109724	-0.0728198	-0.0692225	54022	53212	53406	0.00108044	0.00106424	0.00106812	0.0950815	393	0.11328	392	0.038807	361
GCAUC	1908	7285	40	0.000598836	0.000834456	0.000569995	-0.0712102	-0.549886	27660	34685	27753	0.0005532	0.0006937	0.00055506	0.114359	376	0.266525	283	0.0383066	362
GUACC	1461	5951	40	0.000458543	0.000681654	0.000569995	0.313895	-0.25809	27593	34229	27759	0.00055186	0.00068458	0.00055518	-0.267247	775	-0.00617926	477	0.0379948	363
UGAUA	5594	14981	142	0.00175571	0.00171599	0.00202348	0.20479	0.2378	98282	84633	99084	0.00196564	0.00169266	0.00198168	-0.162948	656	0.0197495	451	0.0301173	364
UACCC	1914	4623	40	0.000600719	0.000529539	0.000569995	-0.0757399	0.106213	28493	34624	27938	0.00056986	0.00069248	0.00055876	0.0760827	411	-0.387035	752	0.0287216	365
UGACU	2437	7769	75	0.000764865	0.000889896	0.00106874	0.482635	0.264204	51652	53313	52395	0.00103304	0.00106626	0.0010479	-0.433619	921	-0.260851	667	0.0284118	366
GCAUA	3230	6321	74	0.00101375	0.000724036	0.00105449	0.0568421	0.542415	52466	54196	51705	0.00104932	0.00108392	0.0010341	-0.0497492	542	-0.582126	881	0.0281718	367
UCAGG	1506	6495	38	0.000472666	0.000743966	0.000541496	0.196129	-0.458288	26646	33814	26562	0.00053292	0.00067628	0.00053124	-0.173098	670	0.137617	378	0.027586	368
AAACG	3723	8399	75	0.00116848	0.000962059	0.00106874	-0.128724	0.151716	52485	56006	52472	0.0010497	0.00112012	0.00104944	0.15466	334	-0.219456	646	0.0262932	369
GCCGU	1110	3437	20	0.000348379	0.000393689	0.000284998	-0.289709	-0.466107	14177	21405	14000	0.00028354	0.0004281	0.00028	0.297107	233	-0.12089	564	0.0255236	370
GCAGG	1369	4671	20	0.000429668	0.000535037	0.000284998	-0.592271	-0.908689	13609	22024	14043	0.00027218	0.00044048	0.00028086	0.658661	51	0.280563	272	0.0210992	371
AAUAG	5948	11171	141	0.00186681	0.00127958	0.00200923	0.10607	0.650979	97979	86861	99027	0.00195958	0.00173722	0.00198054	-0.0699685	563	-0.441114	794	0.0207517	372
UGUCG	1420	5238	38	0.000445674	0.000599984	0.000541496	0.280959	-0.147974	26819	32985	26689	0.00053638	0.0006597	0.00053378	-0.267265	776	-0.136886	576	0.0207045	373
GAGCU	1779	6055	38	0.000558349	0.000693567	0.000541496	-0.0442161	-0.357085	26820	34496	26708	0.0005364	0.00068992	0.00053416	0.0578567	425	0.00760565	464	0.0196779	374
AUGGC	1976	8437	38	0.000620178	0.000966412	0.000541496	-0.195733	-0.835688	27085	34244	26718	0.0005417	0.00068488	0.00053436	0.195188	304	0.496787	126	0.0191378	375
GCUUG	2113	7489	38	0.000663176	0.000857824	0.000541496	-0.292442	-0.663731	26798	33136	26728	0.00053596	0.00066272	0.00053456	0.307267	229	0.372281	193	0.0185979	376
AGUGC	1972	5104	38	0.000618923	0.000584635	0.000541496	-0.192809	-0.110586	27040	34025	26745	0.0005408	0.0006805	0.0005349	0.194664	305	-0.219059	645	0.0176806	377
ACGUU	2748	7625	74	0.000862474	0.000873402	0.00105449	0.289994	0.271831	52323	52976	52098	0.00104646	0.00105952	0.00104196	-0.278964	790	-0.278694	679	0.0172477	378
CCAAU	2833	14021	76	0.000889152	0.00160603	0.00108299	0.28452	-0.568475	53386	54868	53583	0.00106772	0.00109736	0.00107166	-0.264031	773	0.54946	108	0.0151744	379
ACUGG	1681	7799	38	0.000527591	0.000893332	0.000541496	0.0375307	-0.722247	26745	34102	26792	0.0005349	0.00068204	0.00053584	-0.0198501	512	0.389341	179	0.0151475	380
UACUG	3330	8849	74	0.00104514	0.0010136	0.00105449	0.0128541	0.0570534	52198	52878	52174	0.00104396	0.00105756	0.00104348	0.00162706	491	-0.0612454	509	0.0151446	381
GCUCU	2039	6803	39	0.000639951	0.000779246	0.000555746	-0.203537	-0.487654	27218	32930	27505	0.00054436	0.0006586	0.0005501	0.2334	275	0.242676	299	0.0147306	382
ACCCC	985	3121	21	0.000309147	0.000357493	0.000299248	-0.0469553	-0.256576	15234	22329	14832	0.00030468	0.00044658	0.00029664	0.0210002	471	-0.321003	704	0.0126266	383
GACCA	1381	7430	39	0.000433434	0.000851065	0.000555746	0.358612	-0.614845	27509	34879	27569	0.00055018	0.00069758	0.00055138	-0.344091	851	0.286911	267	0.0113776	384
CUCCA	1750	9727	40	0.000549247	0.00111417	0.000569995	0.053496	-0.966952	28707	34563	28315	0.00057414	0.00069126	0.0005663	-0.0639482	557	0.688674	59	0.00938385	385
AUGUC	2401	8105	73	0.000753566	0.000928383	0.00104024	0.465112	0.164127	51651	53240	51722	0.00103302	0.0010648	0.00103444	-0.455061	935	-0.197791	630	0.00806878	386
UCCUC	2615	9920	39	0.000820732	0.00113628	0.000555746	-0.562486	-1.03182	28808	33500	27634	0.00057616	0.00067	0.00055268	0.510441	102	0.762087	42	0.0079801	387
GGUUU	3357	11199	71	0.00105361	0.00128278	0.00101174	-0.0585026	-0.342436	50499	51390	50353	0.00100998	0.0010278	0.00100706	0.0610171	420	0.319718	236	0.00669167	388
ACCAC	2001	8530	40	0.000628024	0.000977064	0.000569995	-0.13987	-0.777503	28678	35269	28437	0.00057356	0.00070538	0.00056874	0.130876	358	0.470053	135	0.0031811	389
AAUAC	5564	12105	143	0.00174629	0.00138656	0.00203773	0.222672	0.555455	101402	87661	101709	0.00202804	0.00175322	0.00203418	-0.215792	708	-0.338496	721	0.00251818	390
ACAAU	5917	14418	143	0.00185708	0.0016515	0.00203773	0.133928	0.303187	101693	87523	101870	0.00203386	0.00175046	0.0020374	-0.131183	622	-0.0839553	525	0.000236274	391
GCGCU	1284	3162	20	0.00040299	0.00036219	0.000284998	-0.499794	-0.345795	14215	21117	14314	0.0002843	0.00042234	0.00028628	0.503331	111	-0.22166	647	-0.00647651	392
UAACG	2401	6599	73	0.000753566	0.000755879	0.00104024	0.465112	0.460692	52262	54797	52251	0.00104524	0.00109594	0.00104502	-0.472028	939	-0.535942	853	-0.00661181	393
CCCUC	1386	3965	21	0.000435003	0.000454169	0.000299248	-0.539687	-0.601889	15169	21458	15034	0.00030338	0.00042916	0.00030068	0.519901	95	0.081713	412	-0.0068892	394
UGGGC	1151	4943	19	0.000361247	0.000566193	0.000270748	-0.416037	-1.06434	13735	21378	13603	0.0002747	0.00042756	0.00027206	0.39513	168	0.405168	170	-0.00697506	395
AUUGU	5880	14391	137	0.00184547	0.00164841	0.00195223	0.0811388	0.244052	97638	82473	98113	0.00195276	0.00164946	0.00196226	-0.0815272	573	-0.000919176	473	-0.00738994	396
UAACC	2312	6151	75	0.000725633	0.000704563	0.00106874	0.5586	0.601112	53834	54795	53768	0.00107668	0.0010959	0.00107536	-0.569277	971	-0.637316	901	-0.00890684	397
CCGGA	938	3306	20	0.000294396	0.000378684	0.000284998	-0.0468089	-0.410044	14182	21568	14351	0.00028364	0.00043136	0.00028702	0.0536982	433	-0.187898	620	-0.0102009	398
AGGAC	1484	5632	37	0.000465761	0.000645114	0.000527246	0.178885	-0.291079	26850	35054	26550	0.000537	0.00070108	0.000531	-0.205332	696	-0.120024	561	-0.0102362	399
GCGUG	987	2210	19	0.000309775	0.000253143	0.000270748	-0.194272	0.0969957	13819	21256	13635	0.00027638	0.00042512	0.0002727	0.164568	323	-0.747916	945	-0.0103649	400
GCUCC	1010	4314	20	0.000316994	0.000494145	0.000284998	-0.153504	-0.793984	14748	21355	14362	0.00029496	0.0004271	0.00028724	0.103935	386	0.21036	315	-0.0113063	401
GAGUG	1611	4368	36	0.000505621	0.00050033	0.000512996	0.0208914	0.0360667	25965	34109	25856	0.0005193	0.00068218	0.00051712	-0.0385123	532	-0.447272	798	-0.0115518	402
GUCCC	855	3194	20	0.000268346	0.000365855	0.000284998	0.0868546	-0.360322	14761	21254	14374	0.00029522	0.00042508	0.00028748	-0.137695	634	-0.216462	642	-0.0125112	403
ACAAC	3344	11148	75	0.00104953	0.00127694	0.00106874	0.0261667	-0.25678	53777	56457	53941	0.00107554	0.00112914	0.00107882	-0.035315	527	0.177468	343	-0.0135413	404
ACGGG	801	2565	19	0.000251398	0.000293807	0.000270748	0.106976	-0.117917	13873	21826	13686	0.00027746	0.00043652	0.00027372	-0.142306	636	-0.571181	877	-0.0157511	405
AUAUU	12459	20525	267	0.00391032	0.00235103	0.00380472	-0.0394976	0.6945	190805	133517	192495	0.0038161	0.00267034	0.0038499	0.0351887	456	-0.183733	616	-0.0170309	406
UUUGG	3901	17651	70	0.00122435	0.00202182	0.000997492	-0.295638	-1.01928	50590	51200	50471	0.0010118	0.001024	0.00100942	0.275091	244	0.981442	6	-0.0171494	407
UUCCG	2156	5671	38	0.000676672	0.000649582	0.000541496	-0.321507	-0.262561	27584	33361	27403	0.00055168	0.00066722	0.00054806	0.294625	235	-0.0386516	497	-0.017384	408
GUUAU	4723	10416	136	0.00148234	0.0011931	0.00193798	0.386682	0.699848	98821	82686	98135	0.00197642	0.00165372	0.0019627	-0.415015	911	-0.471006	817	-0.0182826	409
CAUCA	3612	15382	74	0.00113365	0.00176192	0.00105449	-0.104422	-0.740603	53807	54959	53409	0.00107614	0.00109918	0.00106818	0.0751034	412	0.680723	61	-0.0186072	410
CGACC	629	2696	20	0.000197415	0.000308812	0.000284998	0.529719	-0.115778	14876	21956	14445	0.00029752	0.00043912	0.0002889	-0.591755	979	-0.507887	837	-0.0196198	411
CCACU	2099	7439	39	0.000658782	0.000852096	0.000555746	-0.245377	-0.616592	28899	34439	28187	0.00057798	0.00068878	0.00056374	0.188782	307	0.306973	250	-0.0206054	412
CACGC	1031	2361	20	0.000323585	0.000270439	0.000284998	-0.183193	0.0756446	14699	22090	14467	0.00029398	0.0004418	0.00028934	0.138426	350	-0.708088	930	-0.0218154	413
GUUCC	1849	7613	38	0.000580318	0.000872027	0.000541496	-0.0998948	-0.687423	27891	33145	27490	0.00055782	0.0006629	0.0005498	0.057045	428	0.395582	175	-0.0219571	414
GGUGA	2023	8416	36	0.000634929	0.000964006	0.000512996	-0.307648	-0.910095	26116	34073	26059	0.00052232	0.00068146	0.00052118	0.281662	241	0.500413	125	-0.0228344	415
UCAAC	3343	12244	74	0.00104922	0.00140248	0.00105449	0.00723288	-0.411435	53742	55151	53591	0.00107484	0.00110302	0.00107182	-0.0348072	526	0.346524	211	-0.0235151	416
GCUCA	1814	5947	38	0.000569333	0.000681196	0.000541496	-0.0723241	-0.33112	27712	34349	27567	0.00055424	0.00068698	0.00055134	0.038763	450	-0.0121983	482	-0.0259925	417
GGGAC	757	3376	19	0.000237588	0.000386702	0.000270748	0.188485	-0.514273	13832	21786	13787	0.00027664	0.00043572	0.00027574	-0.219545	712	-0.172179	603	-0.0263588	418
AGUUC	2858	9897	71	0.000896998	0.00113365	0.00101174	0.173664	-0.16413	52390	53420	51574	0.0010478	0.0010684	0.00103148	-0.224186	721	0.0855191	408	-0.0278745	419
CAGGG	1037	3803	19	0.000325468	0.000435613	0.000270748	-0.265566	-0.686096	13950	21644	13805	0.000279	0.00043288	0.0002761	0.22225	286	0.00907856	463	-0.0282411	420
CUUCG	2100	7301	38	0.000659096	0.000836289	0.000541496	-0.283539	-0.627052	27846	33241	27624	0.00055692	0.00066482	0.00055248	0.243019	266	0.331038	225	-0.0289724	421
GUUCU	3631	11044	71	0.00113961	0.00126503	0.00101174	-0.171697	-0.322329	51941	51970	51628	0.00103882	0.0010394	0.00103256	0.133593	356	0.28342	270	-0.0293843	422
UGCGA	1611	4091	37	0.000505621	0.000468601	0.000527246	0.0604197	0.170114	26605	33951	26906	0.0005321	0.00067902	0.00053812	-0.0736415	566	-0.535093	852	-0.0294523	423
ACUUC	3615	11424	73	0.00113459	0.00130856	0.00104024	-0.125248	-0.331057	53781	53681	53140	0.00107562	0.00107362	0.0010628	0.0769985	409	0.285492	268	-0.0309514	424
GAUAG	2617	7537	70	0.000821359	0.000863322	0.000997492	0.280292	0.208407	50699	54292	50969	0.00101398	0.00108584	0.00101938	-0.303944	811	-0.330841	711	-0.0313147	425
UCCCA	1864	7795	39	0.000585026	0.000892874	0.000555746	-0.0740768	-0.684032	28656	34033	28426	0.00057312	0.00068066	0.00056852	0.029664	459	0.391522	178	-0.0327866	426
AACGG	1805	5684	37	0.000566509	0.000651071	0.000527246	-0.103623	-0.304339	26583	35092	26981	0.00053166	0.00070184	0.00053962	0.0915943	397	-0.108328	549	-0.0334682	427
GCGCG	845	912	10	0.000265208	0.000104465	0.000142499	-0.896172	0.447937	7272	13539	7294	0.00014544	0.00027078	0.00014588	0.866699	22	-1.37411	1022	-0.0338317	428
AUGUA	6122	8286	135	0.00192142	0.000949115	0.00192373	0.00173542	1.01925	98123	84452	98599	0.00196246	0.00168904	0.00197198	-0.0304889	521	-0.831548	976	-0.0357351	429
AAUAU	12410	20538	264	0.00389494	0.00235251	0.00376197	-0.0501142	0.677285	190977	136008	193095	0.00381954	0.00272016	0.0038619	0.0282036	463	-0.209488	639	-0.0378225	430
CCCAA	1902	8777	39	0.000596953	0.00100536	0.000555746	-0.103192	-0.855211	28682	35277	28561	0.00057364	0.00070554	0.00057122	0.057471	427	0.510908	121	-0.039622	431
AGUGA	3265	8616	69	0.00102474	0.000986915	0.000983242	-0.0596357	-0.00537928	50214	54572	50583	0.00100428	0.00109144	0.00101166	0.0290928	460	-0.145235	581	-0.0411059	432
UCAAU	5680	17974	138	0.0017827	0.00205882	0.00196648	0.141556	-0.0662006	101405	85485	101284	0.0020281	0.0017097	0.00202568	-0.186067	681	0.268076	280	-0.0427876	433
CAGCU	2058	7320	37	0.000645914	0.000838465	0.000527246	-0.292867	-0.669276	27613	34270	27161	0.00055226	0.0006854	0.00054322	0.225995	281	0.290805	265	-0.0430609	434
CCAAC	1883	9534	38	0.000590989	0.00109207	0.000541496	-0.126183	-1.01204	28754	35224	27897	0.00057508	0.00070448	0.00055794	0.0393698	449	0.632431	76	-0.0431602	435
AUUAC	4999	10099	138	0.00156896	0.00115678	0.00196648	0.325808	0.765498	101299	85123	101390	0.00202598	0.00170246	0.0020278	-0.368809	869	-0.557501	864	-0.0442967	436
GUGUU	3105	8333	69	0.000974521	0.000954499	0.000983242	0.0128541	0.042803	50665	51623	50795	0.0010133	0.00103246	0.0010159	-0.0562968	550	-0.11327	553	-0.0471398	437
CUGGA	1748	9086	36	0.000548619	0.00104075	0.000512996	-0.0968573	-1.02061	26895	34087	26527	0.0005379	0.00068174	0.00053054	0.0284666	462	0.610331	84	-0.0485142	438
UAGCA	3193	8711	71	0.00100214	0.000997797	0.00101174	0.0137574	0.0200233	52213	54529	52383	0.00104426	0.00109058	0.00104766	-0.0593971	553	-0.128278	570	-0.0503293	439
GGAGC	1063	4372	19	0.000333628	0.000500788	0.000270748	-0.301291	-0.887251	13856	21952	14020	0.00027712	0.00043904	0.0002804	0.26773	249	0.189849	333	-0.0505366	440
CGGCU	1129	3030	19	0.000354343	0.00034707	0.000270748	-0.388195	-0.358276	14315	21333	14031	0.0002863	0.00042666	0.00028062	0.307617	228	-0.297861	694	-0.051668	441
UGCUA	3076	8544	70	0.000965419	0.000978668	0.000997492	0.0471504	0.0274859	52127	52986	51731	0.00104254	0.00105972	0.00103462	-0.110876	600	-0.114792	556	-0.0527238	442
ACUCC	1474	5478	38	0.000462623	0.000627475	0.000541496	0.227114	-0.212607	28352	34490	28125	0.00056704	0.0006898	0.0005625	-0.293615	806	-0.136621	575	-0.0549033	443
UCGUU	3237	9493	70	0.00101595	0.00108737	0.000997492	-0.0264515	-0.124467	52263	52025	51900	0.00104526	0.0010405	0.001038	-0.0410332	534	0.0635668	427	-0.0574292	444
CUGCA	2409	8138	37	0.000756077	0.000932163	0.000527246	-0.520058	-0.822106	27598	34163	27455	0.00055196	0.00068326	0.0005491	0.45397	134	0.448147	147	-0.0585933	445
GAUAU	5381	13818	133	0.00168886	0.00158278	0.00189523	0.166331	0.25992	98295	85016	98712	0.0019659	0.00170032	0.00197424	-0.219144	711	-0.10335	545	-0.0589208	446
GUGGU	1964	8726	35	0.000616412	0.000999515	0.000498746	-0.305589	-1.00292	26134	33010	26059	0.00052268	0.0006602	0.00052118	0.237966	272	0.598325	92	-0.0634764	447
UCCAC	1894	7965	38	0.000594442	0.000912347	0.000541496	-0.134586	-0.752632	28592	34457	28306	0.00057184	0.00068914	0.00056612	0.0559242	430	0.404785	171	-0.0641581	448
CCCCU	1321	2928	20	0.000414603	0.000335386	0.000284998	-0.54078	-0.234873	15175	21539	14900	0.0003035	0.00043078	0.000298	0.450033	138	-0.361128	732	-0.064362	449
UCCAA	3149	17501	72	0.00098833	0.00200464	0.00102599	0.0539541	-0.966326	54146	54960	53718	0.00108292	0.0010992	0.00107436	-0.131862	624	0.866891	21	-0.0664583	450
GAAGU	3703	11524	68	0.00116221	0.00132001	0.000968992	-0.262309	-0.445992	50193	54374	50760	0.00100386	0.00108748	0.0010152	0.211308	294	0.27956	273	-0.0672069	451
CCCGG	677	1516	10	0.00021248	0.000173649	0.000142499	-0.576377	-0.285227	7617	13665	7477	0.00015234	0.0002733	0.00014954	0.480032	120	-0.654308	910	-0.0695811	452
CCCAC	1372	4221	20	0.000430609	0.000483492	0.000284998	-0.59543	-0.762542	15186	22292	14966	0.00030372	0.00044584	0.00029932	0.503638	110	0.116967	391	-0.0707383	453
CGGAA	2162	5660	36	0.000678555	0.000648322	0.000512996	-0.403519	-0.337763	26681	35091	26958	0.00053362	0.00070182	0.00053916	0.346653	198	-0.114391	555	-0.0717662	454
AAGCG	2141	4746	36	0.000671964	0.000543628	0.000512996	-0.389437	-0.0836726	26781	34976	26962	0.00053562	0.00069952	0.00053924	0.327174	210	-0.363745	735	-0.0719802	455
UAUGG	2652	8783	67	0.000832344	0.00100604	0.000954742	0.197931	-0.0755101	50746	52748	50220	0.00101492	0.00105496	0.0010044	-0.286114	797	-0.0684948	515	-0.0731506	456
CUGCU	2470	9211	36	0.000775223	0.00105507	0.000512996	-0.595663	-1.04032	27770	33285	26992	0.0005554	0.0006657	0.00053984	0.481083	119	0.664393	67	-0.0735846	457
UCUGA	2584	10477	69	0.000811002	0.00120008	0.000983242	0.277841	-0.287515	52274	53114	51892	0.00104548	0.00106228	0.00103784	-0.366388	865	0.175969	344	-0.0779654	458
AUUCA	5459	16835	135	0.00171334	0.00192836	0.00192373	0.167102	-0.00346171	101602	85084	101573	0.00203204	0.00170168	0.00203146	-0.246121	745	0.180412	339	-0.0786072	459
CAACU	3154	10896	71	0.0009899	0.00124808	0.00101174	0.0314873	-0.302865	53990	54496	53423	0.0010798	0.00108992	0.00106846	-0.12541	613	0.195484	330	-0.0786916	460
AUCAU	5330	16824	135	0.00167285	0.0019271	0.00192373	0.201603	-0.00251874	101600	85000	101694	0.002032	0.0017	0.00203388	-0.280594	792	0.180894	338	-0.0803248	461
CAUAG	2381	5940	69	0.000747289	0.000680394	0.000983242	0.39588	0.531176	52224	54157	51981	0.00104448	0.00108314	0.00103962	-0.483046	947	-0.670777	916	-0.0804376	462
ACAGA	3447	10383	69	0.00108186	0.00118932	0.000983242	-0.137894	-0.274512	51965	55810	52050	0.0010393	0.0011162	0.001041	0.0579005	424	0.0915356	406	-0.0823514	463
ACCUU	3250	10296	71	0.00102003	0.00117935	0.00101174	-0.0117697	-0.22115	53574	53762	53598	0.00107148	0.00107524	0.00107196	-0.0709939	564	0.133333	384	-0.0834098	464
CCGGC	657	2223	10	0.000206203	0.000254632	0.000142499	-0.533114	-0.837465	7513	13515	7551	0.00015026	0.0002703	0.00015102	0.456604	132	-0.0861458	528	-0.0837892	465
GGGCU	1061	3654	18	0.000333	0.000418545	0.000256498	-0.376577	-0.706437	13731	21062	13592	0.00027462	0.00042124	0.00027184	0.278087	243	-0.00925803	479	-0.0838105	466
UACGU	2938	4596	69	0.000922107	0.000526446	0.000983242	0.0926129	0.90126	52149	53322	52109	0.00104298	0.00106644	0.00104218	-0.177706	674	-1.01844	1011	-0.0839858	467
CGGGU	970	2240	18	0.00030444	0.00025658	0.000256498	-0.247209	-0.000459219	13661	21453	13622	0.00027322	0.00042906	0.00027244	0.156093	333	-0.741773	942	-0.0869913	468
AACUG	3219	10395	69	0.0010103	0.00119069	0.000983242	-0.0391653	-0.276179	52097	54521	52293	0.00104194	0.00109042	0.00104586	-0.0444883	538	0.126914	387	-0.0890711	469
UGAGU	2449	7196	67	0.000768632	0.000824262	0.000954742	0.312819	0.212009	50597	52840	50832	0.00101194	0.0010568	0.00101664	-0.39676	896	-0.358528	731	-0.0906255	470
CCGCA	1246	3435	19	0.000391064	0.00039346	0.000270748	-0.530454	-0.539268	14766	22295	14420	0.00029532	0.0004459	0.0002884	0.405124	161	-0.180502	610	-0.0911214	471
GUUUA	4959	9948	130	0.00155641	0.00113949	0.00185249	0.251241	0.701076	98904	82892	98832	0.00197808	0.00165784	0.00197664	-0.34588	852	-0.540919	855	-0.0935881	472
ACAGU	3126	8098	68	0.000981112	0.000927581	0.000968992	-0.0179321	0.0630117	52059	54575	51744	0.00104118	0.0010915	0.00103488	-0.0857304	579	-0.234767	654	-0.0949065	473
UUCGU	3314	9515	68	0.00104012	0.00108989	0.000968992	-0.102188	-0.169626	51844	51636	51766	0.00103688	0.00103272	0.00103532	0.00449599	489	0.0777342	418	-0.0955197	474
ACGUG	1612	3658	35	0.000505935	0.000419004	0.000498746	-0.0206459	0.251342	26890	34185	26673	0.0005378	0.0006837	0.00053346	-0.0881186	584	-0.706401	929	-0.0970748	475
ACCGA	1257	5010	36	0.000394516	0.000573868	0.000512996	0.378863	-0.161771	27494	34952	27443	0.00054988	0.00069904	0.00054886	-0.479033	946	-0.284657	683	-0.0974909	476
AACCG	1513	4638	36	0.000474863	0.000531257	0.000512996	0.111436	-0.0504633	27373	35284	27477	0.00054746	0.00070568	0.00054954	-0.205242	695	-0.409604	774	-0.0992772	477
CUGAG	1487	5327	35	0.000466703	0.000610178	0.000498746	0.0958012	-0.290926	26855	34237	26755	0.0005371	0.00068474	0.0005351	-0.202687	693	-0.166325	602	-0.101503	478
ACGAU	2437	8208	68	0.000764865	0.000940181	0.000968992	0.341279	0.0435466	52619	55086	52017	0.00105238	0.00110172	0.00104034	-0.460378	937	-0.228747	650	-0.102498	479
CGAAC	1429	4677	36	0.000448499	0.000535724	0.000512996	0.193842	-0.0625439	27806	35054	27569	0.00055612	0.00070108	0.00055138	-0.310291	816	-0.388088	753	-0.1041	480
AAGCC	2083	7164	36	0.000653761	0.000820597	0.000512996	-0.349815	-0.677726	27611	35033	27605	0.00055222	0.00070066	0.0005521	0.243519	265	0.227959	307	-0.105982	481
UGGUU	3122	12590	66	0.000979856	0.00144211	0.000940492	-0.0591536	-0.616698	50908	51484	50676	0.00101816	0.00102968	0.00101352	-0.0553224	549	0.48599	130	-0.107886	482
GGAGU	1503	5511	34	0.000471724	0.000631255	0.000484496	0.0385407	-0.381737	26046	33744	26114	0.00052092	0.00067488	0.00052228	-0.143117	637	-0.0964091	538	-0.108338	483
CGAUG	1831	7488	35	0.000574669	0.000857709	0.000498746	-0.204426	-0.782183	27106	33866	26914	0.00054212	0.00067732	0.00053828	0.084119	404	0.340651	216	-0.110052	484
UCUGG	1715	8978	35	0.000538262	0.00102838	0.000498746	-0.110003	-1.044	26751	33168	26914	0.00053502	0.00066336	0.00053828	0.00871517	482	0.63251	75	-0.110052	485
AUCAA	5910	19779	132	0.00185488	0.00226558	0.00188098	0.0201589	-0.268389	101183	87926	101606	0.00202366	0.00175852	0.00203212	-0.125637	615	0.365516	195	-0.111497	486
UGCGU	1876	4088	35	0.000588792	0.000468258	0.000498746	-0.239454	0.0910023	26793	32972	26964	0.00053586	0.00065944	0.00053928	0.135903	353	-0.493938	829	-0.112729	487
UGGAC	1328	7078	35	0.0004168	0.000810746	0.000498746	0.258951	-0.700944	26892	34110	26981	0.00053784	0.0006822	0.00053962	-0.367822	868	0.249055	296	-0.113639	488
GGCCA	1224	6308	18	0.000384159	0.000722546	0.000256498	-0.582756	-1.49414	14233	22023	13902	0.00028466	0.00044046	0.00027804	0.432463	148	0.714079	53	-0.116345	489
CUUUA	5774	13661	131	0.0018122	0.00156479	0.00186674	0.0427748	0.254546	101469	83525	101259	0.00202938	0.0016705	0.00202518	-0.163297	657	-0.0943091	534	-0.117533	490
AAUAA	12940	20588	249	0.00406129	0.00235824	0.00354822	-0.194841	0.589385	190985	139448	193011	0.0038197	0.00278896	0.00386022	0.0884777	401	-0.242016	657	-0.121587	491
CUAUU	5872	11054	131	0.00184296	0.00126617	0.00186674	0.0184939	0.560041	100960	82854	101763	0.0020192	0.00165708	0.00203526	-0.131761	623	-0.388167	754	-0.124696	492
ACGAA	3125	9439	67	0.000980798	0.00108119	0.000954742	-0.0388441	-0.17943	52115	55867	52075	0.0010423	0.00111734	0.0010415	-0.0877431	581	-0.0474546	502	-0.125479	493
UCAAA	7043	23568	131	0.00221048	0.00269958	0.00186674	-0.243844	-0.53222	101694	87918	102065	0.00203388	0.00175836	0.0020413	0.120127	368	0.618507	80	-0.128971	494
UCUGU	3402	10090	66	0.00106774	0.00115575	0.000940492	-0.183066	-0.297346	52230	51687	51542	0.0010446	0.00103374	0.00103084	0.0316039	458	0.160961	364	-0.132332	495
UGGUG	2218	11766	33	0.000696131	0.00134773	0.000470246	-0.565942	-1.51904	25909	33065	25804	0.00051818	0.0006613	0.00051608	0.425905	155	1.02715	4	-0.134178	496
UCUCA	3425	9448	68	0.00107495	0.00108222	0.000968992	-0.149718	-0.159432	53520	53388	53221	0.0010704	0.00106776	0.00106442	0.00612529	487	0.0194012	454	-0.13551	497
GGAUA	2676	8554	65	0.000839877	0.000979813	0.000926243	0.141213	-0.0811169	50763	54531	50887	0.00101526	0.00109062	0.00101774	-0.2736	782	-0.15457	591	-0.135907	498
AAUGU	5340	12562	126	0.00167599	0.00143891	0.00179549	0.099363	0.3194	97957	84605	98655	0.00195914	0.0016921	0.0019731	-0.225209	724	-0.233841	653	-0.13609	499
GCCUU	2528	7932	35	0.000793426	0.000908567	0.000498746	-0.669791	-0.865287	27814	33281	27447	0.00055628	0.00066562	0.00054894	0.512285	100	0.448894	145	-0.138343	500
CUCGA	1800	4417	35	0.000564939	0.000505943	0.000498746	-0.179791	-0.0206693	28030	34335	27485	0.0005606	0.0006867	0.0005497	0.0111246	478	-0.440705	793	-0.140339	501
UGCCU	2222	6851	35	0.000697386	0.000784744	0.000498746	-0.483653	-0.653917	27835	33467	27489	0.0005567	0.00066934	0.00054978	0.325058	212	0.229483	306	-0.140549	502
CGCAG	1156	3425	18	0.000362817	0.000392315	0.000256498	-0.500294	-0.613064	14380	21874	14153	0.0002876	0.00043748	0.00028306	0.335177	206	-0.157205	594	-0.142161	503
CUCAU	3158	8814	68	0.000991155	0.00100959	0.000968992	-0.0326255	-0.0592195	53750	53509	53475	0.001075	0.00107018	0.0010695	-0.117154	605	-0.0840769	526	-0.142379	504
AUCCA	2578	13141	68	0.000809119	0.00150523	0.000968992	0.260133	-0.635426	53810	54712	53482	0.0010762	0.00109424	0.00106964	-0.411523	907	0.460054	139	-0.142568	505
AUGGU	2710	11679	64	0.000850548	0.00133776	0.000911993	0.10063	-0.55273	50816	52901	50354	0.00101632	0.00105802	0.00100708	-0.256891	758	0.338458	219	-0.143084	506
GAGUU	2562	9018	64	0.000804097	0.00103296	0.000911993	0.181652	-0.179693	50726	52873	50374	0.00101452	0.00105746	0.00100748	-0.335356	846	-0.0338159	494	-0.143657	507
UCCGG	901	3241	18	0.000282784	0.000371239	0.000256498	-0.140751	-0.5334	14344	21582	14175	0.00028688	0.00043164	0.0002835	-0.020749	514	-0.217482	644	-0.144401	508
ACACG	1323	3077	35	0.000415231	0.000352453	0.000498746	0.264393	0.500873	27839	35490	27589	0.00055678	0.0007098	0.00055178	-0.423195	915	-1.00998	1010	-0.145788	509
CCUGA	1596	6536	35	0.000500913	0.000748663	0.000498746	-0.00625477	-0.58601	27376	34021	27604	0.00054752	0.00068042	0.00055208	-0.128352	618	0.13789	377	-0.146572	510
UAUCC	2728	8614	68	0.000856197	0.000986686	0.000968992	0.178542	-0.026106	53908	53427	53631	0.00107816	0.00106854	0.00107262	-0.332556	841	-0.114978	557	-0.146582	511
UGGGG	995	4600	17	0.000312286	0.000526905	0.000242248	-0.366383	-1.12106	13592	20966	13411	0.00027184	0.00041932	0.00026822	0.20011	299	0.32949	226	-0.146932	512
GGGCG	709	2076	9	0.000222523	0.000237794	0.000128249	-0.79501	-0.890767	7134	13547	7118	0.00014268	0.00027094	0.00014236	0.641174	58	-0.188259	621	-0.150597	513
ACACA	3834	6632	68	0.00120332	0.000759659	0.000968992	-0.312465	0.351133	53897	56344	53791	0.00107794	0.00112688	0.00107582	0.158745	329	-0.56891	871	-0.15088	514
CACAA	3399	9398	68	0.00106679	0.00107649	0.000968992	-0.138725	-0.151776	53872	56331	53799	0.00107744	0.00112662	0.00107598	-0.0143258	506	-0.0656675	514	-0.151094	515
UACGA	2299	5949	66	0.000721553	0.000681425	0.000940492	0.382311	0.464861	52419	54523	52225	0.00104838	0.00109046	0.0010445	-0.538984	963	-0.67831	921	-0.151324	516
AGCGC	1252	3037	18	0.000392947	0.000347872	0.000256498	-0.615387	-0.439607	14334	21743	14270	0.00028668	0.00043486	0.0002854	0.454893	133	-0.321996	705	-0.154038	517
GCGUC	1010	3086	18	0.000316994	0.000353484	0.000256498	-0.305507	-0.462699	14375	21228	14275	0.0002875	0.00042456	0.0002855	0.140893	347	-0.264323	672	-0.154543	518
GGCAC	1283	4278	18	0.000402676	0.000490021	0.000256498	-0.650673	-0.933897	14367	21984	14319	0.00028734	0.00043968	0.00028638	0.486862	116	0.15639	369	-0.158983	519
CGCCU	1175	3372	18	0.00036878	0.000386244	0.000256498	-0.523813	-0.590565	14737	21129	14320	0.00029474	0.00042258	0.0002864	0.323317	214	-0.129712	572	-0.159084	520
GCCUC	1268	4764	18	0.000397968	0.00054569	0.000256498	-0.633707	-1.08913	14703	21084	14322	0.00029406	0.00042168	0.00028644	0.436544	144	0.371933	194	-0.159286	521
AAGUU	5611	16403	124	0.00176104	0.00187887	0.00176699	0.00486126	-0.088577	98295	85187	98679	0.0019659	0.00170374	0.00197358	-0.158761	653	0.141162	376	-0.159525	522
CAAUA	6050	15597	128	0.00189882	0.00178655	0.00182399	-0.0580123	0.0299179	101141	88281	102007	0.00202282	0.00176562	0.00204014	-0.0912615	586	0.0170015	457	-0.161574	523
CCAUA	2848	8868	67	0.00089386	0.00101578	0.000954742	0.0950629	-0.0894051	54227	54863	53396	0.00108454	0.00109726	0.00106792	-0.278963	789	-0.111317	551	-0.16162	524
GCGGU	1130	3522	17	0.000354656	0.000403426	0.000242248	-0.549937	-0.735818	14005	21038	13554	0.0002801	0.00042076	0.00027108	0.34048	202	-0.0606949	508	-0.162234	525
GUUCA	2977	11129	65	0.000934347	0.00127477	0.000926243	-0.0125685	-0.46077	51996	52960	52017	0.00103992	0.0010592	0.00104034	-0.154442	649	0.267257	282	-0.167593	526
AUUUA	9142	16044	238	0.00286926	0.00183775	0.00339147	0.241231	0.88397	191207	132584	190783	0.00382414	0.00265168	0.00381566	-0.414454	910	-0.528965	849	-0.170021	527
CAUAU	6548	11261	127	0.00205512	0.00128989	0.00180974	-0.183447	0.488536	101232	85226	101861	0.00202464	0.00170452	0.00203722	0.0215602	469	-0.402123	766	-0.170823	528
UAAAA	13555	18895	240	0.00425431	0.00216432	0.00341997	-0.31494	0.660072	190651	139463	192741	0.00381302	0.00278926	0.00385482	0.15799	331	-0.36597	737	-0.172679	529
UUACA	5201	10166	126	0.00163236	0.00116446	0.00179549	0.137414	0.624714	101352	85266	101203	0.00202704	0.00170532	0.00202406	-0.312414	818	-0.550383	859	-0.172878	530
CGUUG	1795	7080	33	0.00056337	0.000810975	0.000470246	-0.260667	-0.786241	26655	33226	26507	0.0005331	0.00066452	0.00053014	0.0796771	406	0.287345	266	-0.172957	531
CCGGG	587	1460	9	0.000184233	0.000167235	0.000128249	-0.522585	-0.382929	7383	13664	7235	0.00014766	0.00027328	0.0001447	0.319253	217	-0.708504	931	-0.174118	532
CCCUG	1167	3736	18	0.000366269	0.000427938	0.000256498	-0.513957	-0.738455	14614	21323	14482	0.00029228	0.00042646	0.00028964	0.325553	211	0.0049918	466	-0.175314	533
ACCCA	1834	7666	35	0.000575611	0.000878098	0.000498746	-0.206788	-0.816076	28640	35362	28180	0.0005728	0.00070724	0.0005636	0.00706156	486	0.312182	241	-0.176366	534
CAUUA	5137	13175	126	0.00161227	0.00150912	0.00179549	0.155277	0.250663	101383	85434	101549	0.00202766	0.00170868	0.00203098	-0.330718	840	-0.179172	609	-0.177802	535
CUCUC	2277	6305	35	0.000714648	0.000722203	0.000498746	-0.518928	-0.534099	28814	33408	28241	0.00057628	0.00066816	0.00056482	0.310464	224	0.112211	393	-0.179486	536
UGUCA	3058	10134	64	0.000959769	0.00116079	0.000911993	-0.0736655	-0.348017	52479	53454	51652	0.00104958	0.00106908	0.00103304	-0.129052	619	0.118742	390	-0.179802	537
UAUUC	6252	13073	125	0.00196222	0.00149744	0.00178124	-0.139611	0.25038	101775	82865	100925	0.0020355	0.0016573	0.0020185	-0.0528941	544	-0.146337	583	-0.180405	538
UUUAG	5044	11466	122	0.00158309	0.00131337	0.00173849	0.135092	0.404562	98062	82939	98519	0.00196124	0.00165878	0.00197038	-0.309026	815	-0.336853	719	-0.180642	539
CGAAU	2182	7307	65	0.000684832	0.000836976	0.000926243	0.43564	0.146203	51925	54997	52500	0.0010385	0.00109994	0.00105	-0.600679	983	-0.394166	758	-0.180927	540
AAGUA	5971	11452	122	0.00187403	0.00131176	0.00173849	-0.108312	0.406324	98817	87133	98638	0.00197634	0.00174266	0.00197276	-0.0766873	572	-0.409784	775	-0.182384	541
CAACG	1662	6991	34	0.000521627	0.00080078	0.000484496	-0.106535	-0.724921	27682	35447	27508	0.00055364	0.00070894	0.00055016	-0.0859284	580	0.175743	345	-0.183366	542
AGCGG	1308	3786	17	0.000410523	0.000433665	0.000242248	-0.760977	-0.840097	13453	21824	13761	0.00026906	0.00043648	0.00027522	0.609534	66	-0.00933337	480	-0.1841	543
CACUG	1956	6716	34	0.000613901	0.000769281	0.000484496	-0.341521	-0.667025	27791	34253	27528	0.00055582	0.00068506	0.00055056	0.143388	345	0.16728	356	-0.184415	544
UGCCC	1235	4296	18	0.000387611	0.000492083	0.000256498	-0.595663	-0.939954	14804	21751	14586	0.00029608	0.00043502	0.00029172	0.388623	171	0.17782	342	-0.185637	545
CACAC	2486	4100	35	0.000780244	0.000469632	0.000498746	-0.64562	0.0867736	28620	35454	28406	0.0005724	0.00070908	0.00056812	0.446902	139	-0.594417	886	-0.18789	546
ACUGU	3236	7914	64	0.00101564	0.000906505	0.000911993	-0.155289	0.00870745	52486	53479	51946	0.00104972	0.00106958	0.00103892	-0.0476216	541	-0.238658	656	-0.18799	547
AACAC	3085	8375	66	0.000968243	0.00095931	0.000940492	-0.0419535	-0.0285806	53790	56280	53628	0.0010758	0.0011256	0.00107256	-0.151968	645	-0.230625	651	-0.18957	548
CCGAC	674	2625	18	0.000211538	0.000300679	0.000256498	0.278027	-0.229278	14696	22183	14632	0.00029392	0.00044366	0.00029264	-0.474504	944	-0.561229	867	-0.19018	549
GUAUC	2373	7697	64	0.000744779	0.000881649	0.000911993	0.292211	0.0488183	51898	52683	52067	0.00103796	0.00105366	0.00104134	-0.478867	945	-0.257133	666	-0.191347	550
CUGGC	1283	5164	17	0.000402676	0.000591508	0.000242248	-0.733135	-1.28791	14190	21428	13846	0.0002838	0.00042856	0.00027692	0.504746	107	0.4649	138	-0.192984	551
UCGAG	1692	4414	33	0.000531043	0.000505599	0.000470246	-0.175413	-0.104578	26673	33778	26906	0.00053346	0.00067556	0.00053812	-0.00655111	494	-0.41809	778	-0.194512	552
CCUCC	1370	5707	18	0.000429982	0.000653705	0.000256498	-0.745328	-1.34969	15335	21460	14696	0.0003067	0.0004292	0.00029392	0.487447	115	0.60699	87	-0.196476	553
GAGCG	970	2563	17	0.00030444	0.000293577	0.000242248	-0.329671	-0.277256	13684	21783	13895	0.00027368	0.00043566	0.0002779	0.153666	335	-0.569461	872	-0.198081	554
GGCAU	1929	6407	33	0.000605427	0.000733886	0.000470246	-0.364536	-0.64214	26808	33765	27020	0.00053616	0.0006753	0.0005404	0.175289	318	0.120028	389	-0.200611	555
GCCCG	622	1719	9	0.000195218	0.000196902	0.000128249	-0.606139	-0.61853	7566	13665	7371	0.00015132	0.0002733	0.00014742	0.367483	182	-0.473008	821	-0.200985	556
AGCGA	1759	4618	33	0.000552071	0.000528966	0.000470246	-0.231438	-0.16976	26741	34915	27041	0.00053482	0.0006983	0.00054082	0.0458015	443	-0.400671	763	-0.201732	557
UCAUG	2639	8579	63	0.000828264	0.000982677	0.000897743	0.116211	-0.130415	52006	52917	51721	0.00104012	0.00105834	0.00103442	-0.328587	838	-0.107014	548	-0.204448	558
AUCUU	5528	18373	123	0.00173499	0.00210453	0.00175274	0.0146798	-0.263886	101236	82715	101094	0.00202472	0.0016543	0.00202188	-0.222793	716	0.347274	210	-0.206089	559
UGCGG	1212	3487	17	0.000380393	0.000399417	0.000242248	-0.651004	-0.721409	13693	21327	13992	0.00027386	0.00042654	0.00027984	0.474051	124	-0.0947869	535	-0.208117	560
AUUCU	5864	16986	123	0.00184045	0.00194565	0.00175274	-0.0704477	-0.150645	101227	83655	101332	0.00202454	0.0016731	0.00202664	-0.137538	633	0.21773	309	-0.209481	561
CAUCU	3349	12114	65	0.0010511	0.00138759	0.000926243	-0.18244	-0.583121	53660	53517	53550	0.0010732	0.00107034	0.001071	-0.0300173	520	0.374514	188	-0.209496	562
GUGCC	1190	4259	17	0.000373488	0.000487845	0.000242248	-0.624576	-1.00994	14102	21775	14006	0.00028204	0.0004355	0.00028012	0.405161	160	0.16375	358	-0.20956	563
GAGUA	2486	6096	62	0.000780244	0.000698263	0.000883493	0.179293	0.339448	50655	53846	51088	0.0010131	0.00107692	0.00102176	-0.376779	873	-0.625069	896	-0.209766	564
CGAAG	1958	7414	33	0.000614529	0.000849233	0.000470246	-0.386064	-0.852743	27039	35197	27259	0.00054078	0.00070394	0.00054518	0.184438	310	0.270707	279	-0.213316	565
GUGUC	1528	5070	32	0.000479571	0.00058074	0.000455996	-0.0727217	-0.348871	26994	33086	26453	0.00053988	0.00066172	0.00052906	-0.170895	665	-0.188327	622	-0.214409	566
UAAAG	5821	13692	120	0.00182695	0.00156834	0.00170999	-0.0954536	0.124744	98060	86999	99317	0.0019612	0.00173998	0.00198634	-0.102298	593	-0.14983	587	-0.216128	567
CUCAG	1522	5329	33	0.000477688	0.000610407	0.000470246	-0.0226514	-0.376356	27651	34079	27368	0.00055302	0.00068158	0.00054736	-0.211264	702	-0.15911	596	-0.219074	568
GCACG	1052	2511	17	0.000330176	0.000287621	0.000242248	-0.446749	-0.247685	14648	22140	14122	0.00029296	0.0004428	0.00028244	0.17253	320	-0.622485	894	-0.221459	569
UAUCA	5616	15085	122	0.00176261	0.0017279	0.00173849	-0.0198827	0.00880906	101373	85229	101521	0.00202746	0.00170458	0.00203042	-0.201959	692	0.0196062	452	-0.223947	570
GCCAG	1185	5139	17	0.000371918	0.000588644	0.000242248	-0.618501	-1.28091	14209	21764	14158	0.00028418	0.00043528	0.00028316	0.388181	173	0.435452	152	-0.225132	571
UAGCC	1600	4464	33	0.000502168	0.000511327	0.000470246	-0.0947549	-0.120828	27742	34190	27501	0.00055484	0.0006838	0.00055002	-0.1439	638	-0.41933	779	-0.226068	572
GACGA	1462	7649	32	0.000458856	0.000876151	0.000455996	-0.00902044	-0.942157	26811	34791	26685	0.00053622	0.00069582	0.0005337	-0.224782	722	0.332465	223	-0.227007	573
CGCAU	1766	3880	33	0.000554268	0.000444433	0.000470246	-0.237168	0.081452	28016	34258	27525	0.00056032	0.00068516	0.0005505	-0.0156662	508	-0.624477	895	-0.227326	574
GGUGG	1355	7293	16	0.000425274	0.000835373	0.000227998	-0.89937	-1.8734	13374	21366	13347	0.00026748	0.00042732	0.00026694	0.668961	49	0.967103	7	-0.227493	575
GUCCA	1362	6996	33	0.000427471	0.000801353	0.000470246	0.13759	-0.769022	27679	34730	27544	0.00055358	0.0006946	0.00055088	-0.372966	870	0.206256	321	-0.228322	576
GCAUG	1744	4937	32	0.000547364	0.000565506	0.000455996	-0.263477	-0.31052	26972	34088	26752	0.00053944	0.00068176	0.00053504	0.021037	470	-0.269722	675	-0.230624	577
GCUAC	1697	5146	33	0.000532612	0.000589446	0.000470246	-0.17967	-0.325943	27589	34627	27594	0.00055178	0.00069254	0.00055188	-0.0510072	543	-0.232538	652	-0.230938	578
AACGU	2654	7529	62	0.000832972	0.000862405	0.000883493	0.0849508	0.0348526	51987	54973	51891	0.00103974	0.00109946	0.00103782	-0.319883	829	-0.350357	727	-0.232266	579
ACGGC	1089	3413	17	0.000341788	0.00039094	0.000242248	-0.496618	-0.690463	14374	21935	14233	0.00028748	0.0004387	0.00028466	0.249642	260	-0.166287	601	-0.232755	580
CGACA	1355	5464	33	0.000425274	0.000625871	0.000470246	0.145024	-0.412449	27576	34922	27650	0.00055152	0.00069844	0.000553	-0.375021	871	-0.158271	595	-0.233863	581
AAACC	3237	11440	64	0.00101595	0.00131039	0.000911993	-0.155734	-0.522901	53800	56776	53684	0.001076	0.00113552	0.00107368	-0.0828494	577	0.206642	320	-0.23547	582
GCGCC	894	2420	9	0.000280587	0.000277198	0.000128249	-1.1295	-1.11197	7647	13670	7550	0.00015294	0.0002734	0.000151	0.87548	20	0.0199016	450	-0.235601	583
AGCUU	3566	10249	62	0.00111921	0.00117397	0.000883493	-0.341188	-0.4101	52200	53440	52022	0.001044	0.0010688	0.00104044	0.100356	389	0.135399	382	-0.235903	584
UAGAA	5732	13442	118	0.00179902	0.00153971	0.00168149	-0.0974727	0.127082	97683	86786	99111	0.00195366	0.00173572	0.00198222	-0.118969	607	-0.172879	605	-0.23738	585
AUUAU	10353	17367	229	0.00324934	0.00198929	0.00326322	0.00614968	0.714042	190507	132032	192444	0.00381014	0.00264064	0.00384888	-0.229696	725	-0.408631	771	-0.238141	586
UCCAG	1624	9100	33	0.000509701	0.00104235	0.000470246	-0.116235	-1.14836	27780	34249	27765	0.0005556	0.00068498	0.0005553	-0.124396	612	0.605712	89	-0.239851	587
CUGAU	2547	9821	62	0.000799389	0.00112494	0.000883493	0.14432	-0.348559	52086	53078	52223	0.00104172	0.00106156	0.00104446	-0.381997	879	0.0836637	411	-0.241467	588
GCUGU	2127	7161	32	0.00066757	0.000820253	0.000455996	-0.549897	-0.847047	26798	33034	26965	0.00053596	0.00066068	0.0005393	0.316794	220	0.312117	242	-0.242066	589
CCCCG	555	1416	9	0.00017419	0.000162195	0.000128249	-0.441712	-0.338782	7776	13922	7585	0.00015552	0.00027844	0.0001517	0.163559	326	-0.779637	957	-0.242274	590
CAUCG	1827	7374	33	0.000573414	0.000844651	0.000470246	-0.28616	-0.844939	27818	34004	27821	0.00055636	0.00068008	0.00055642	0.0435574	445	0.312651	239	-0.242758	591
GCGAG	942	2387	16	0.000295652	0.000273418	0.000227998	-0.374876	-0.262084	13700	21912	13506	0.000274	0.00043824	0.00027012	0.109722	383	-0.680615	922	-0.244578	592
UUUAA	8966	16713	226	0.00281403	0.00191438	0.00322047	0.194637	0.750395	190683	132672	191384	0.00381366	0.00265344	0.00382768	-0.43854	927	-0.470985	816	-0.249197	593
UCACA	2990	7417	63	0.000938427	0.000849576	0.000897743	-0.0639427	0.0795587	53890	55373	53439	0.0010778	0.00110746	0.00106878	-0.199773	689	-0.382439	747	-0.251591	594
CUCCG	1022	3052	17	0.00032076	0.00034959	0.000242248	-0.405009	-0.529178	14753	21632	14431	0.00029506	0.00043264	0.00028862	0.120486	366	-0.307504	700	-0.252686	595
UUCGC	1883	4792	32	0.000590989	0.000548897	0.000455996	-0.37411	-0.267513	27549	33355	27180	0.00055098	0.0006671	0.0005436	0.101132	388	-0.281367	681	-0.253523	596
CCCGA	733	2329	17	0.000230056	0.000266774	0.000242248	0.0745006	-0.139133	14693	21981	14446	0.00029386	0.00043962	0.00028892	-0.353144	856	-0.720639	935	-0.254185	597
CACCG	1116	4755	17	0.000350262	0.000544659	0.000242248	-0.531951	-1.16887	14856	21933	14476	0.00029712	0.00043866	0.00028952	0.237391	273	0.31225	240	-0.257178	598
GCUAA	2633	7374	61	0.000826381	0.000844651	0.000869243	0.0729527	0.0414044	52105	54737	51954	0.0010421	0.00109474	0.00103908	-0.334615	844	-0.374161	742	-0.257475	599
GAUCA	2322	9250	61	0.000728772	0.00105954	0.000869243	0.254292	-0.285602	52384	54877	51957	0.00104768	0.00109754	0.00103914	-0.523659	955	-0.0508405	505	-0.257559	600
UUACG	2633	5073	61	0.000826381	0.000581084	0.000869243	0.0729527	0.581013	52108	53080	51969	0.00104216	0.0010616	0.00103938	-0.334698	845	-0.869421	988	-0.257892	601
GUCGC	958	2845	17	0.000300673	0.000325879	0.000242248	-0.311712	-0.427851	14323	21488	14496	0.00028646	0.00042976	0.00028992	0.0698633	416	-0.399195	762	-0.25917	602
CACUC	1596	4411	33	0.000500913	0.000505256	0.000470246	-0.0911437	-0.103597	28160	34775	28183	0.0005632	0.0006955	0.00056366	-0.169087	661	-0.461037	812	-0.261409	603
UCGCC	1161	3859	17	0.000364386	0.000442027	0.000242248	-0.588982	-0.86765	14856	21346	14529	0.00029712	0.00042692	0.00029058	0.294422	236	0.0501691	433	-0.26245	604
AGCUC	1628	5894	32	0.000510956	0.000675125	0.000455996	-0.164178	-0.566133	27362	34361	27370	0.00054724	0.00068722	0.0005474	-0.0989736	588	-0.0256172	490	-0.263573	605
UUGAC	2673	10931	61	0.000838935	0.00125209	0.000869243	0.0512004	-0.526502	52089	53339	52188	0.00104178	0.00106678	0.00104376	-0.312419	819	0.23107	304	-0.263958	606
UAUAC	6389	7541	118	0.00200522	0.00086378	0.00168149	-0.254024	0.961002	101774	85268	101165	0.00203548	0.00170536	0.0020233	-0.0216076	515	-0.981341	1005	-0.266973	607
UAGGC	1397	3307	31	0.000438456	0.000378799	0.000441746	0.0107872	0.221788	26478	34140	26592	0.00052956	0.0006828	0.00053184	-0.272363	781	-0.850032	984	-0.267774	608
UUGCG	1988	5071	31	0.000623944	0.000580855	0.000441746	-0.498199	-0.394959	26814	33371	26621	0.00053628	0.00066742	0.00053242	0.218431	289	-0.200417	635	-0.269346	609
GACUG	1403	4748	31	0.000440339	0.000543857	0.000441746	0.00460417	-0.300009	26908	34206	26634	0.00053816	0.00068412	0.00053268	-0.289421	800	-0.331022	712	-0.270051	610
GGUAC	1520	5973	31	0.00047706	0.000684174	0.000441746	-0.110952	-0.631145	27021	34229	26668	0.00054042	0.00068458	0.00053336	-0.17991	676	-0.000855651	472	-0.271891	611
UCCGU	1672	4471	32	0.000524766	0.000512128	0.000455996	-0.202652	-0.167483	27628	33549	27557	0.00055256	0.00067098	0.00055114	-0.0744569	567	-0.389764	756	-0.273397	612
AUGAC	2868	9567	60	0.000900137	0.00109585	0.000854993	-0.0742316	-0.358061	52171	54884	51717	0.00104342	0.00109768	0.00103434	-0.213104	704	-0.00241126	475	-0.274726	613
UGUAA	5327	10199	114	0.00167191	0.00116824	0.00162449	-0.0415104	0.475649	98055	85103	98449	0.0019611	0.00170206	0.00196898	-0.230169	728	-0.542946	857	-0.277464	614
GUCAG	1406	4923	31	0.000441281	0.000563902	0.000441746	0.00152258	-0.352227	26783	34076	26804	0.00053566	0.00068152	0.00053608	-0.279622	791	-0.27331	676	-0.27923	615
ACGGA	1648	4467	31	0.000517233	0.00051167	0.000441746	-0.227597	-0.211995	26533	35082	26808	0.00053066	0.00070164	0.00053616	-0.0369721	529	-0.455517	805	-0.279445	616
CGCCC	756	2129	9	0.000237275	0.000243865	0.000128249	-0.88761	-0.927136	7836	13884	7783	0.00015672	0.00027768	0.00015566	0.598368	69	-0.18734	618	-0.279451	617
CGCAC	1153	2196	17	0.000361875	0.00025154	0.000242248	-0.579007	-0.0543007	14518	22452	14703	0.00029036	0.00044904	0.00029406	0.317649	219	-0.836058	978	-0.279625	618
UAGGG	1369	3353	30	0.000429668	0.000384068	0.000427497	-0.00730898	0.154553	25692	33865	25947	0.00051384	0.0006773	0.00051894	-0.258097	762	-0.818435	969	-0.279655	619
UAAUA	10251	14702	222	0.00321733	0.00168403	0.00316347	-0.024354	0.90959	190873	136527	192040	0.00381746	0.00273054	0.0038408	-0.246749	747	-0.697266	928	-0.279897	620
AAUUC	4779	17653	117	0.00149991	0.00202205	0.00166724	0.152579	-0.278362	101544	85374	101231	0.00203088	0.00170748	0.00202462	-0.437225	925	0.243952	298	-0.280192	621
UUGUA	5695	12657	113	0.00178741	0.00144979	0.00161024	-0.150594	0.15143	98277	82678	97805	0.00196554	0.00165356	0.0019561	-0.137059	632	-0.189732	624	-0.280707	622
CAUGU	2667	7045	60	0.000837052	0.000806966	0.000854993	0.0305956	0.0834054	51923	53269	51999	0.00103846	0.00106538	0.00103998	-0.311057	817	-0.400789	765	-0.282571	623
GAUGU	2696	9287	58	0.000846154	0.00106377	0.000826493	-0.0339166	-0.364117	50736	52650	50444	0.00101472	0.001053	0.00100888	-0.26209	772	0.0146869	458	-0.287679	624
GGAUC	1189	6319	31	0.000373174	0.000723806	0.000441746	0.24337	-0.712385	26868	34233	26983	0.00053736	0.00068466	0.00053966	-0.526041	957	0.0802163	415	-0.288832	625
GUCUC	1476	5409	31	0.00046325	0.000619571	0.000441746	-0.0685735	-0.488051	27598	32839	26996	0.00055196	0.00065678	0.00053992	-0.252772	754	-0.0841405	527	-0.289527	626
GGGUA	1722	4605	30	0.000540459	0.000527477	0.000427497	-0.338272	-0.303196	25964	34055	26181	0.00051928	0.0006811	0.00052362	0.0576719	426	-0.368758	740	-0.292607	627
UCAUC	3973	17043	61	0.00124695	0.00195218	0.000869243	-0.520569	-1.16726	54248	53394	53281	0.00108496	0.00106788	0.00106562	0.200758	298	0.870338	19	-0.293862	628
AGUAG	3076	7718	58	0.000965419	0.000884054	0.000826493	-0.224152	-0.0971315	50533	54239	50681	0.00101066	0.00108478	0.00101362	-0.0660709	559	-0.295196	692	-0.294442	629
UCUCG	1759	4322	31	0.000552071	0.000495061	0.000441746	-0.321636	-0.164388	27848	33818	27149	0.00055696	0.00067636	0.00054298	-0.0127188	505	-0.450184	802	-0.29768	630
CACAU	3341	7074	61	0.00104859	0.000810288	0.000869243	-0.27062	0.101326	53814	54849	53448	0.00107628	0.00109698	0.00106896	-0.0376021	530	-0.437031	786	-0.298376	631
CUACU	3074	7467	61	0.000964791	0.000855304	0.000869243	-0.150457	0.0233231	54293	53021	53564	0.00108586	0.00106042	0.00107128	-0.17055	664	-0.310127	701	-0.301504	632
UAGUG	2841	7203	58	0.000891663	0.000825064	0.000826493	-0.109495	0.0024976	50796	53315	50983	0.00101592	0.0010663	0.00101966	-0.188217	683	-0.370036	741	-0.303013	633
UGUAU	6438	9705	112	0.0020206	0.00111165	0.00159599	-0.340335	0.521741	98456	82037	98457	0.00196912	0.00164074	0.00196914	0.0372329	452	-0.561639	868	-0.303117	634
GUUAA	3939	9587	112	0.00123628	0.00109814	0.00159599	0.368448	0.53939	97805	84997	98487	0.0019561	0.00169994	0.00196974	-0.661979	1000	-0.630425	899	-0.303556	635
UACAA	5540	12714	115	0.00173876	0.00145632	0.00163874	-0.0854731	0.170258	100806	87310	101432	0.00201612	0.0017462	0.00202864	-0.213524	705	-0.261893	671	-0.307929	636
AUAUC	5381	13897	115	0.00168886	0.00159182	0.00163874	-0.0434614	0.041903	101041	85529	101494	0.00202082	0.00171058	0.00202988	-0.258895	763	-0.103804	546	-0.30881	637
UCGUC	1502	7580	31	0.000471411	0.000868247	0.000441746	-0.0937656	-0.974887	27696	33293	27376	0.00055392	0.00066586	0.00054752	-0.232693	732	0.382887	185	-0.309693	638
ACGUA	2842	4579	59	0.000891977	0.000524499	0.000840743	-0.0853406	0.680725	52566	54622	52124	0.00105132	0.00109244	0.00104248	-0.237124	738	-1.05854	1015	-0.310282	639
CGAUU	2235	6922	59	0.000701467	0.000792877	0.000840743	0.261291	0.0845686	51857	53127	52145	0.00103714	0.00106254	0.0010429	-0.564164	969	-0.422349	781	-0.310864	640
GGGUG	1229	4055	15	0.000385728	0.000464478	0.000213748	-0.851671	-1.1197	13084	21189	13262	0.00026168	0.00042378	0.00026524	0.559781	77	0.132294	385	-0.311385	641
AGCCG	1129	3041	16	0.000354343	0.00034833	0.000227998	-0.636123	-0.611431	14233	21816	14162	0.00028466	0.00043632	0.00028324	0.315905	222	-0.324933	708	-0.313003	642
GGUCC	782	3766	16	0.000245435	0.000431374	0.000227998	-0.106318	-0.919918	14343	21501	14162	0.00028686	0.00043002	0.00028324	-0.225007	723	0.00453701	468	-0.313003	643
UUAUC	5421	13691	114	0.00170141	0.00156823	0.00162449	-0.0667461	0.0508486	101590	83531	100932	0.0020318	0.00167062	0.00201864	-0.256028	757	-0.091248	533	-0.313399	644
GGACU	1111	4531	30	0.000348693	0.000519001	0.000427497	0.293955	-0.279824	27002	33932	26565	0.00054004	0.00067864	0.0005313	-0.631108	992	-0.386909	751	-0.313614	645
CGGAC	681	2147	16	0.000213735	0.000245927	0.000227998	0.0931962	-0.109208	14192	21996	14177	0.00028384	0.00043992	0.00028354	-0.409252	905	-0.839011	979	-0.31453	646
GUGUA	2875	5236	57	0.000902334	0.000599755	0.000812244	-0.151749	0.437539	50183	53122	50572	0.00100366	0.00106244	0.00101144	-0.153537	648	-0.824937	971	-0.316427	647
AGGUG	1958	6898	29	0.000614529	0.000790128	0.000413247	-0.572477	-0.935083	25836	34121	25755	0.00051672	0.00068242	0.0005151	0.250097	259	0.211426	313	-0.317849	648
GCACU	2013	4927	31	0.000631791	0.000564361	0.000441746	-0.516228	-0.353399	27912	34004	27541	0.00055824	0.00068008	0.00055082	0.178561	315	-0.269087	674	-0.318362	649
ACACU	2738	6244	60	0.000859336	0.000715216	0.000854993	-0.00730898	0.257535	53902	54879	53383	0.00107804	0.00109758	0.00106766	-0.327117	836	-0.617876	891	-0.320468	650
GGGUU	1593	5758	29	0.000499971	0.000659547	0.000413247	-0.274842	-0.674472	26330	32741	25806	0.0005266	0.00065482	0.00051612	-0.0748618	568	0.0103772	462	-0.320703	651
AUAAC	4833	10425	114	0.00151686	0.00119413	0.00162449	0.0988939	0.444029	100927	87504	101585	0.00201854	0.00175008	0.0020317	-0.412222	908	-0.551466	860	-0.322703	652
AGUGU	2754	6202	57	0.000864357	0.000710405	0.000812244	-0.0897157	0.193271	50055	53077	50851	0.0010011	0.00106154	0.00101702	-0.211886	703	-0.579446	879	-0.324364	653
GGGGU	956	3068	15	0.000300046	0.000351422	0.000213748	-0.489269	-0.717293	13403	21271	13395	0.00026806	0.00042542	0.0002679	0.162626	327	-0.275682	678	-0.325782	654
CACUA	2915	7010	60	0.000914888	0.000802957	0.000854993	-0.0976824	0.0905907	53686	54821	53610	0.00107372	0.00109642	0.0010722	-0.230951	730	-0.449406	800	-0.326589	655
GACAG	1807	6182	30	0.000567136	0.000708114	0.000427497	-0.407783	-0.728069	26834	34825	26820	0.00053668	0.0006965	0.0005364	0.0796338	408	0.0238581	447	-0.327396	656
CCAGA	1661	9175	31	0.000521314	0.00105095	0.000441746	-0.238933	-1.2504	27457	35009	27736	0.00054914	0.00070018	0.00055472	-0.0750225	570	0.58589	99	-0.328541	657
AUUCG	2201	7321	58	0.000690795	0.00083858	0.000826493	0.258745	-0.0209452	52048	53292	51918	0.00104096	0.00106584	0.00103836	-0.591584	978	-0.34597	726	-0.329232	658
GCGGG	814	1723	8	0.000255478	0.00019736	0.000113999	-1.16418	-0.791808	7082	13567	7165	0.00014164	0.00027134	0.0001433	0.850971	25	-0.459271	810	-0.330016	659
UGACA	3143	10199	58	0.000986447	0.00116824	0.000826493	-0.255238	-0.49926	52231	54511	52017	0.00104462	0.00109022	0.00104034	-0.0826646	575	0.0997162	400	-0.33198	660
UAGCG	1595	4300	30	0.000500599	0.000492541	0.000427497	-0.227743	-0.204332	26395	34216	26937	0.0005279	0.00068432	0.00053874	-0.0766088	571	-0.474427	823	-0.333676	661
UUCUA	5834	13393	112	0.00183103	0.00153409	0.00159599	-0.198208	0.0570622	101683	83098	100909	0.00203366	0.00166196	0.00201818	-0.151422	643	-0.115499	558	-0.338606	662
GCCCA	1202	4904	16	0.000377254	0.000561726	0.000227998	-0.726514	-1.30084	14509	22010	14436	0.00029018	0.0004402	0.00028872	0.378588	177	0.351708	206	-0.340649	663
UCAUA	4961	10222	112	0.00155704	0.00117087	0.00159599	0.0356468	0.446864	101181	85539	101168	0.00202362	0.00171078	0.00202336	-0.378136	874	-0.547069	858	-0.342304	664
GGCCG	699	2022	8	0.000219385	0.000231609	0.000113999	-0.944441	-1.02267	7485	13818	7228	0.0001497	0.00027636	0.00014456	0.55139	81	-0.254858	663	-0.342646	665
CUUAC	2771	6299	59	0.000869693	0.000721516	0.000840743	-0.0488408	0.220635	53664	53543	53379	0.00107328	0.00107086	0.00106758	-0.303448	810	-0.569667	873	-0.344607	666
CCCAG	1010	4700	16	0.000316994	0.000538359	0.000227998	-0.475432	-1.23955	14750	21801	14480	0.000295	0.00043602	0.0002896	0.10374	387	0.304174	253	-0.345039	667
CACCU	1899	6916	31	0.000596011	0.00079219	0.000441746	-0.432121	-0.842627	28770	34569	28060	0.0005754	0.00069138	0.0005612	0.0507741	437	0.196367	327	-0.345296	668
CCUAU	2510	5169	59	0.000787777	0.00059208	0.000840743	0.0938786	0.505872	53903	53320	53413	0.00107806	0.0010664	0.00106826	-0.452579	932	-0.848884	982	-0.345526	669
CCUCA	2023	7124	31	0.000634929	0.000816015	0.000441746	-0.523377	-0.885377	28708	34498	28073	0.00057416	0.00068996	0.00056146	0.145143	344	0.242083	301	-0.345965	670
UAAUG	4908	12963	109	0.0015404	0.00148484	0.00155324	0.0119719	0.0649711	98263	85233	98754	0.00196526	0.00170466	0.00197508	-0.351414	855	-0.199177	632	-0.346633	671
ACCCU	1840	5224	31	0.000577494	0.00059838	0.000441746	-0.386587	-0.437844	28494	34697	28092	0.00056988	0.00069394	0.00056184	0.019147	473	-0.213748	641	-0.346941	672
AGAUC	2309	8958	58	0.000724692	0.00102609	0.000826493	0.189636	-0.312081	52137	54296	52561	0.00104274	0.00108592	0.00105122	-0.52494	956	-0.0817615	524	-0.346989	673
CUACC	1650	5923	31	0.000517861	0.000678447	0.000441746	-0.229347	-0.619017	28673	34309	28128	0.00057346	0.00068618	0.00056256	-0.147127	641	-0.0163512	487	-0.348788	674
GGCGA	1038	3880	15	0.000325782	0.000444433	0.000213748	-0.607993	-1.05605	13965	21931	13628	0.0002793	0.00043862	0.00027256	0.22209	287	0.0189928	456	-0.350661	675
CGUAC	1518	3438	30	0.000476432	0.000393804	0.000427497	-0.156358	0.118436	27806	34092	27262	0.00055612	0.00068184	0.00054524	-0.223125	719	-0.791956	963	-0.350979	676
UGGAU	2478	12829	56	0.000777733	0.00146949	0.000797994	0.0371016	-0.880867	50434	52828	50906	0.00100868	0.00105656	0.00101812	-0.375121	872	0.475942	131	-0.351459	677
UCCGC	1197	3392	16	0.000375685	0.000388535	0.000227998	-0.7205	-0.769022	14726	21724	14553	0.00029452	0.00043448	0.00029106	0.351157	196	-0.161246	598	-0.352294	678
CGUUA	2437	6725	57	0.000764865	0.000770312	0.000812244	0.0867066	0.0764703	52272	53462	51933	0.00104544	0.00106924	0.00103866	-0.450833	931	-0.473072	822	-0.354739	679
UAGAG	2570	7783	56	0.000806608	0.0008915	0.000797994	-0.0154906	-0.159857	50462	54185	51157	0.00100924	0.0010837	0.00102314	-0.32333	832	-0.281659	682	-0.358554	680
ACUAU	4947	9002	111	0.00155264	0.00103113	0.00158174	0.0267848	0.617285	101815	85033	101431	0.0020363	0.00170066	0.00202862	-0.391225	886	-0.72187	936	-0.358989	681
CGUUC	1777	5535	30	0.000557721	0.000634004	0.000427497	-0.38363	-0.568578	27970	33289	27416	0.0005594	0.00066578	0.00054832	-0.00433716	493	-0.0705544	517	-0.359105	682
UUAAA	8984	16534	210	0.00281968	0.00189388	0.00299248	0.0858105	0.659996	190391	135789	192052	0.00380782	0.00271578	0.00384104	-0.433436	920	-0.520023	844	-0.360157	683
CCUGC	1343	4731	16	0.000421508	0.00054191	0.000227998	-0.886536	-1.24903	14808	21266	14637	0.00029616	0.00042532	0.00029274	0.509182	103	0.349504	207	-0.360598	684
UCGCA	1661	4246	30	0.000521314	0.000486356	0.000427497	-0.286239	-0.186099	27962	34016	27451	0.00055924	0.00068032	0.00054902	-0.101316	591	-0.484201	824	-0.360946	685
CUGAC	1400	5066	30	0.000439397	0.000580282	0.000427497	-0.0396134	-0.440842	27667	33843	27456	0.00055334	0.00067686	0.00054912	-0.33264	842	-0.222103	648	-0.361209	686
GAAUC	2529	10802	57	0.00079374	0.00123731	0.000812244	0.0332458	-0.607222	52012	54601	52204	0.00104024	0.00109202	0.00104408	-0.390178	885	0.180207	340	-0.362248	687
CAGUA	3203	8908	57	0.00100528	0.00102036	0.000812244	-0.307611	-0.329097	52148	54771	52306	0.00104296	0.00109542	0.00104612	-0.0530887	545	-0.102403	543	-0.365064	688
CGCUU	2120	4852	30	0.000665373	0.00055577	0.000427497	-0.638251	-0.378574	27511	33317	27561	0.00055022	0.00066634	0.00055122	0.274155	245	-0.261771	670	-0.366715	689
AUCUC	3002	8861	58	0.000942194	0.00101498	0.000826493	-0.18902	-0.296374	54122	54198	53336	0.00108244	0.00108396	0.00106672	-0.200192	690	-0.0948623	536	-0.368106	690
GGCAG	1463	5653	15	0.00045917	0.00064752	0.000213748	-1.10312	-1.59901	13703	21797	13794	0.00027406	0.00043594	0.00027588	0.744537	34	0.570795	102	-0.368128	691
CCGAA	1650	5293	30	0.000517861	0.000606284	0.000427497	-0.276653	-0.504081	27676	34969	27604	0.00055352	0.00069938	0.00055208	-0.09607	587	-0.206083	637	-0.368964	692
UGUCU	2844	9483	56	0.000892604	0.00108623	0.000797994	-0.161644	-0.444874	52409	51321	51546	0.00104818	0.00102642	0.00103092	-0.231794	731	0.081702	413	-0.369483	693
UAGGA	2616	5313	55	0.000821045	0.000608575	0.000783744	-0.06708	0.364948	51041	54267	50629	0.00102082	0.00108534	0.00101258	-0.314195	823	-0.834641	977	-0.369582	694
AAUCA	5124	15469	110	0.00160819	0.00177189	0.00156749	-0.0369879	-0.176834	101564	87291	101310	0.00203128	0.00174582	0.0020262	-0.336947	847	0.0213829	449	-0.370323	695
GAUUA	3736	8700	107	0.00117256	0.000996537	0.00152474	0.378895	0.613566	98407	84713	98563	0.00196814	0.00169426	0.00197126	-0.747167	1017	-0.76566	953	-0.370557	696
UACAC	2857	5117	58	0.000896684	0.000586124	0.000826493	-0.117597	0.495797	53984	55349	53470	0.00107968	0.00110698	0.0010694	-0.267931	777	-0.917351	998	-0.371726	697
CUUGU	3788	11229	56	0.00118888	0.00128622	0.000797994	-0.575159	-0.688688	51922	52199	51674	0.00103844	0.00104398	0.00103348	0.19519	303	0.301043	256	-0.373061	698
AGCCU	1727	5931	30	0.000542028	0.000679363	0.000427497	-0.342455	-0.66827	27706	34300	27685	0.00055412	0.000686	0.0005537	-0.0318309	522	-0.0140254	485	-0.373192	699
GCCGC	1080	2985	8	0.000338964	0.000341915	0.000113999	-1.57211	-1.58462	7512	13874	7386	0.00015024	0.00027748	0.00014772	1.17386	4	0.301255	255	-0.373843	700
GACAC	1442	5192	30	0.000452579	0.000594715	0.000427497	-0.0822577	-0.476285	27733	35206	27716	0.00055466	0.00070412	0.00055432	-0.293433	805	-0.243623	660	-0.374806	701
GCGAU	1639	4393	29	0.000514409	0.000503194	0.000413247	-0.315912	-0.284111	26829	34143	26797	0.00053658	0.00068286	0.00053594	-0.060878	555	-0.440476	792	-0.375068	702
AACUC	2448	8921	58	0.000768318	0.00102185	0.000826493	0.1053	-0.30611	54070	55240	53625	0.0010814	0.0011048	0.0010725	-0.493125	948	-0.1126	552	-0.375902	703
GUGAC	1688	5185	29	0.000529788	0.000593913	0.000413247	-0.358411	-0.523248	26769	34112	26837	0.00053538	0.00068224	0.00053674	-0.0151489	507	-0.200028	634	-0.37722	704
GACGU	1321	4724	29	0.000414603	0.000541108	0.000413247	-0.00472661	-0.388913	27043	34143	26848	0.00054086	0.00068286	0.00053696	-0.383525	881	-0.335673	717	-0.377811	705
ACAUC	2737	9383	58	0.000859022	0.00107477	0.000826493	-0.0556916	-0.378954	53663	55136	53736	0.00107326	0.00110272	0.00107472	-0.321233	830	-0.0370376	495	-0.378886	706
CGCUC	1004	2616	16	0.000315111	0.000299648	0.000227998	-0.466836	-0.394248	14579	21602	14833	0.00029158	0.00043204	0.00029666	0.111967	380	-0.527895	848	-0.379788	707
AGAGU	2709	8322	55	0.000850234	0.000953239	0.000783744	-0.117478	-0.282456	50270	54129	51087	0.0010054	0.00108258	0.00102174	-0.241838	741	-0.183564	615	-0.382574	708
CGUAU	2831	5354	56	0.000888524	0.000613271	0.000797994	-0.155034	0.379852	52126	52939	52151	0.00104252	0.00105878	0.00104302	-0.230592	729	-0.787806	962	-0.386318	709
GUAAC	2766	6607	56	0.000868124	0.000756795	0.000797994	-0.121523	0.0764741	51987	54437	52157	0.00103974	0.00108874	0.00104314	-0.26025	766	-0.524684	846	-0.386484	710
AGUUG	3225	10762	54	0.00101218	0.00123273	0.000769494	-0.395489	-0.679872	50541	53238	50320	0.00101082	0.00106476	0.0010064	0.00194437	490	0.211326	314	-0.387222	711
ACCGG	755	3745	15	0.000236961	0.000428969	0.000213748	-0.148735	-1.00496	14162	21895	13978	0.00028324	0.0004379	0.00027956	-0.257377	760	-0.029728	491	-0.387245	712
AUAAA	13230	18300	207	0.00415231	0.00209616	0.00294973	-0.493331	0.49283	190573	139431	193242	0.00381146	0.00278862	0.00386484	0.123569	364	-0.4118	777	-0.389828	713
CGAUA	2411	7160	56	0.000756705	0.000820138	0.000797994	0.0766461	-0.0394902	52360	54410	52363	0.0010472	0.0010882	0.00104726	-0.468734	938	-0.408004	770	-0.392171	714
CCUUG	2289	8793	29	0.000718415	0.00100719	0.000413247	-0.797814	-1.28526	27671	33477	27145	0.00055342	0.00066954	0.0005429	0.376442	179	0.589093	96	-0.393683	715
GCCUG	1183	4246	15	0.000371291	0.000486356	0.000213748	-0.796637	-1.1861	14229	21390	14064	0.00028458	0.0004278	0.00028128	0.383715	175	0.185076	336	-0.396094	716
CGUCA	1758	6816	29	0.000551758	0.000780735	0.000413247	-0.417031	-0.91783	27440	34309	27211	0.0005488	0.00068618	0.00054422	0.00775401	483	0.186246	335	-0.397187	717
GGUUA	2258	6233	54	0.000708685	0.000713956	0.000769494	0.118765	0.108075	50641	52586	50686	0.00101282	0.00105172	0.00101372	-0.515161	952	-0.558844	865	-0.397678	718
AAUUA	8247	14787	205	0.00258836	0.00169377	0.00292123	0.174534	0.786337	190682	136435	192460	0.00381364	0.0027287	0.0038492	-0.559128	968	-0.687977	924	-0.397984	719
AUCUG	2660	10547	55	0.000834855	0.0012081	0.000783744	-0.0911437	-0.624287	51865	53314	51763	0.0010373	0.00106628	0.00103526	-0.313236	821	0.180154	341	-0.401539	720
GGACC	818	3823	15	0.000256734	0.000437903	0.000213748	-0.264359	-1.0347	14269	21818	14119	0.00028538	0.00043636	0.00028238	-0.152612	647	0.00509411	465	-0.401725	721
CUUAU	4895	9303	108	0.00153632	0.00106561	0.00153899	0.00250151	0.530306	101680	83322	101668	0.0020336	0.00166644	0.00203336	-0.404556	902	-0.645094	906	-0.401884	722
CAUAA	5298	9713	108	0.00166281	0.00111257	0.00153899	-0.111637	0.468085	101008	87951	101675	0.00202016	0.00175902	0.0020335	-0.28085	793	-0.660875	911	-0.401983	723
CCAGU	1629	7797	29	0.00051127	0.000893103	0.000413247	-0.307083	-1.11182	27830	34271	27312	0.0005566	0.00068542	0.00054624	-0.122555	609	0.381839	186	-0.402532	724
GAGCC	1070	4382	15	0.000335825	0.000501934	0.000213748	-0.651797	-1.23158	14163	21908	14127	0.00028326	0.00043816	0.00028254	0.245583	262	0.196039	328	-0.402542	725
UCGGC	1023	3064	15	0.000321074	0.000350964	0.000213748	-0.586993	-0.715411	14252	21386	14144	0.00028504	0.00042772	0.00028288	0.171741	321	-0.285343	685	-0.404277	726
AGUAA	5728	10218	105	0.00179776	0.00117042	0.00149624	-0.264863	0.354319	98054	86919	99009	0.00196108	0.00173838	0.00198018	-0.125446	614	-0.570723	875	-0.404292	727
GUAGC	1809	5286	28	0.000567764	0.000605482	0.000398997	-0.508915	-0.601707	26960	34151	26415	0.0005392	0.00068302	0.0005283	0.0744713	413	-0.173844	606	-0.40498	728
CUCAA	3342	10989	57	0.0010489	0.00125873	0.000812244	-0.368899	-0.631984	53638	54981	53774	0.00107276	0.00109962	0.00107548	-0.0324443	523	0.194963	331	-0.404996	729
ACCUC	1766	5906	30	0.000554268	0.0006765	0.000427497	-0.374672	-0.662176	28249	34358	28435	0.00056498	0.00068716	0.0005687	-0.027615	519	-0.0225569	488	-0.411755	730
CCGAG	812	2232	15	0.00025485	0.000255663	0.000213748	-0.253738	-0.258332	14197	21794	14218	0.00028394	0.00043588	0.00028436	-0.155935	652	-0.769686	954	-0.411806	731
GCCUA	1312	3462	29	0.000411778	0.000396553	0.000413247	0.00513614	0.0594898	27748	34225	27494	0.00055496	0.0006845	0.00054988	-0.430517	918	-0.787537	961	-0.412114	732
CUAUG	2335	5738	55	0.000732852	0.000657256	0.000783744	0.09686	0.253926	52275	53112	52167	0.0010455	0.00106224	0.00104334	-0.512599	951	-0.692582	927	-0.412755	733
GAUAA	5492	13878	104	0.00172369	0.00158965	0.00148199	-0.217969	-0.101174	97794	86978	98717	0.00195588	0.00173956	0.00197434	-0.182315	677	-0.130015	573	-0.413837	734
GUAAU	5068	9981	104	0.00159062	0.00114327	0.00148199	-0.102054	0.37437	97720	84543	98734	0.0019544	0.00169086	0.00197468	-0.297138	807	-0.564593	870	-0.414085	735
GACUA	1921	4812	55	0.000602916	0.000551188	0.000783744	0.378425	0.507838	52134	54792	52279	0.00104268	0.00109584	0.00104558	-0.790268	1021	-0.991421	1008	-0.41585	736
GAGAC	1399	5347	28	0.000439084	0.000612469	0.000398997	-0.138118	-0.61826	26868	34880	26650	0.00053736	0.0006976	0.000533	-0.291394	804	-0.187763	619	-0.417758	737
CUAGC	1477	4245	29	0.000463564	0.000486241	0.000413247	-0.165766	-0.234669	27556	34107	27603	0.00055112	0.00068214	0.00055206	-0.249597	752	-0.488396	826	-0.417822	738
GUAUA	6465	7505	103	0.00202907	0.000859656	0.00146774	-0.467227	0.771763	97840	84835	98258	0.0019568	0.0016967	0.00196516	0.0523254	435	-0.9809	1004	-0.421052	739
GCUAG	1430	4235	28	0.000448813	0.000485096	0.000398997	-0.169737	-0.281893	26581	34087	26721	0.00053162	0.00068174	0.00053442	-0.244281	742	-0.490952	828	-0.421597	740
GUAGG	1496	3807	27	0.000469527	0.000436071	0.000384747	-0.2873	-0.180653	26232	34140	25783	0.00052464	0.0006828	0.00051566	-0.160118	655	-0.646901	908	-0.42251	741
UCUAC	2780	8137	56	0.000872518	0.000932048	0.000797994	-0.128807	-0.224028	54008	53169	53501	0.00108016	0.00106338	0.00107002	-0.307989	812	-0.190181	625	-0.423189	742
UCCUA	2565	5273	56	0.000805039	0.000603993	0.000797994	-0.012681	0.401845	53916	53703	53518	0.00107832	0.00107406	0.00107036	-0.421655	914	-0.830471	974	-0.423647	743
CACUU	3711	8940	56	0.00116472	0.00102403	0.000797994	-0.54553	-0.359805	53866	53878	53609	0.00107732	0.00107756	0.00107218	0.112532	379	-0.0735137	519	-0.426098	744
GUAAG	2728	6275	53	0.000856197	0.000718767	0.000755244	-0.181	0.0714195	50584	53987	50747	0.00101168	0.00107974	0.00101494	-0.240738	740	-0.587089	884	-0.42638	745
UACAU	6177	8385	106	0.00193868	0.000960455	0.00151049	-0.360063	0.653224	101410	85094	101500	0.0020282	0.00170188	0.00203	-0.0651223	558	-0.825339	972	-0.426465	746
CCUCG	1160	3336	15	0.000364072	0.00038212	0.000213748	-0.768311	-0.838114	14590	21171	14364	0.0002918	0.00042342	0.00028728	0.319244	218	-0.148062	585	-0.426545	747
AUAAU	10443	17280	201	0.00327759	0.00197933	0.00286423	-0.19449	0.533135	190613	135851	192479	0.00381226	0.00271702	0.00384958	-0.218011	710	-0.457014	806	-0.426555	748
UACUU	5938	11532	106	0.00186367	0.00132093	0.00151049	-0.303134	0.193464	101468	82861	101527	0.00202936	0.00165722	0.00203054	-0.122876	610	-0.327215	710	-0.426849	749
GAUCU	2271	8757	54	0.000712765	0.00100307	0.000769494	0.110483	-0.382435	51961	52866	51845	0.00103922	0.00105732	0.0010369	-0.544002	964	-0.0759957	521	-0.430295	750
AUACA	6430	9650	106	0.00201809	0.00110535	0.00151049	-0.417975	0.450506	101525	87454	101888	0.0020305	0.00174908	0.00203776	-0.00884497	498	-0.662088	912	-0.43197	751
UCAGU	2888	8370	54	0.000906414	0.000958737	0.000769494	-0.23626	-0.317226	52279	53046	52044	0.00104558	0.00106092	0.00104088	-0.206061	697	-0.146109	582	-0.435822	752
AUACC	2810	8782	55	0.000881933	0.00100593	0.000783744	-0.170288	-0.360075	53721	54910	53057	0.00107442	0.0010982	0.00106114	-0.284817	795	-0.126612	569	-0.437161	753
CGUGA	1446	3725	28	0.000453835	0.000426678	0.000398997	-0.18579	-0.096771	26682	34070	27017	0.00053364	0.0006814	0.00054034	-0.2337	734	-0.675354	918	-0.43749	754
ACCGC	1106	3491	15	0.000347124	0.000399875	0.000213748	-0.699538	-0.903635	14542	22283	14475	0.00029084	0.00044566	0.0002895	0.255225	256	-0.156395	593	-0.43765	755
AGUAC	2776	7053	54	0.000871262	0.000807882	0.000769494	-0.179197	-0.070235	51977	54776	52132	0.00103954	0.00109552	0.00104264	-0.254766	756	-0.439399	791	-0.438259	756
UGGGU	1605	7410	27	0.000503738	0.000848775	0.000384747	-0.388763	-1.14147	25993	32753	26068	0.00051986	0.00065506	0.00052136	-0.0454504	540	0.373754	191	-0.43837	757
AUUAG	4065	9662	102	0.00127582	0.00110673	0.00145349	0.188093	0.393218	98312	85013	98555	0.00196624	0.00170026	0.0019711	-0.624013	988	-0.619454	892	-0.439481	758
CUAAU	3999	9341	105	0.00125511	0.00106996	0.00149624	0.253529	0.483783	101468	85284	101512	0.00202936	0.00170568	0.00203024	-0.693214	1008	-0.67279	917	-0.440311	759
UUAAC	4124	9580	105	0.00129434	0.00109734	0.00149624	0.209124	0.447334	101785	85477	101587	0.0020357	0.00170954	0.00203174	-0.653309	997	-0.639603	902	-0.441376	760
CUGUC	1837	6020	28	0.000576552	0.000689558	0.000398997	-0.531074	-0.789294	27732	33264	27133	0.00055464	0.00066528	0.00054266	0.0558994	431	0.0517096	431	-0.443671	761
GACUU	2233	8725	54	0.000700839	0.0009994	0.000769494	0.134827	-0.377153	51898	53190	52502	0.00103796	0.0010638	0.00105004	-0.566596	970	-0.0900921	531	-0.448463	762
GCAUU	3600	10002	53	0.00112988	0.00114567	0.000755244	-0.581154	-0.601182	52073	53218	51570	0.00104146	0.00106436	0.0010314	0.117561	372	0.10621	399	-0.449589	763
UCAGC	2081	7402	28	0.000653133	0.000847858	0.000398997	-0.710999	-1.08745	27625	33886	27275	0.0005525	0.00067772	0.0005455	0.241402	269	0.323134	234	-0.451202	764
CGUGU	1456	3221	27	0.000456973	0.000368948	0.000384747	-0.2482	0.0604934	26618	33232	26350	0.00053236	0.00066464	0.000527	-0.220292	713	-0.849157	983	-0.453893	765
CCGUU	1911	5920	28	0.000599777	0.000678103	0.000398997	-0.58805	-0.765128	27733	33403	27328	0.00055466	0.00066806	0.00054656	0.112824	378	0.0215273	448	-0.454003	766
CCACA	2133	7603	29	0.000669453	0.000870882	0.000413247	-0.69598	-1.07547	28636	35380	28318	0.00057272	0.0007076	0.00056636	0.225153	283	0.299543	257	-0.454716	767
ACAUA	6366	7769	104	0.001998	0.000889896	0.00148199	-0.431025	0.735825	101512	88027	101649	0.00203024	0.00176054	0.00203298	-0.0230918	516	-0.984309	1006	-0.456062	768
GUAAA	6395	12205	101	0.0020071	0.00139802	0.00143924	-0.47981	0.0419256	98414	87094	98756	0.00196828	0.00174188	0.00197512	0.0281802	464	-0.317265	702	-0.456635	769
UGUCC	1716	6154	28	0.000538576	0.000704907	0.000398997	-0.432772	-0.821055	27580	33413	27403	0.0005516	0.00066826	0.00054806	-0.0344735	525	0.0770227	420	-0.457957	770
UUGUC	3269	11249	53	0.00102599	0.00128851	0.000755244	-0.442006	-0.77069	51733	51633	51890	0.00103466	0.00103266	0.0010378	-0.0121361	504	0.319339	237	-0.458514	771
UAUUA	10149	14731	196	0.00318532	0.00168735	0.00279298	-0.189633	0.727041	190656	132218	192047	0.00381312	0.00264436	0.00384094	-0.259535	764	-0.648155	909	-0.459655	772
GCUUA	2585	5441	53	0.000811316	0.000623236	0.000755244	-0.103321	0.277163	52202	53571	51958	0.00104404	0.00107142	0.00103916	-0.363841	864	-0.781673	958	-0.460403	773
AUCGU	2410	8198	53	0.000756391	0.000939036	0.000755244	-0.00218983	-0.314237	52024	53228	52095	0.00104048	0.00106456	0.0010419	-0.460045	936	-0.181006	612	-0.464202	774
UCCUG	1938	7495	28	0.000608252	0.000858511	0.000398997	-0.608291	-1.10546	27708	33467	27535	0.00055416	0.00066934	0.0005507	0.134365	354	0.359097	201	-0.464889	775
UACCU	2819	7367	54	0.000884758	0.000843849	0.000769494	-0.201373	-0.133075	53897	53567	53107	0.00107794	0.00107134	0.00106214	-0.284922	796	-0.344359	724	-0.464992	776
UCAGA	2626	10364	53	0.000824184	0.00118714	0.000755244	-0.126024	-0.652474	52204	54328	52142	0.00104408	0.00108656	0.00104284	-0.341194	848	0.127721	386	-0.465503	777
ACUAG	2479	5400	53	0.000778047	0.00061854	0.000755244	-0.042915	0.288076	52426	55019	52220	0.00104852	0.00110038	0.0010444	-0.430425	917	-0.831063	975	-0.46766	778
UGACG	1694	6692	27	0.000531671	0.000766532	0.000384747	-0.466624	-0.994435	26961	34082	26606	0.00053922	0.00068164	0.00053212	-0.0203407	513	0.169335	353	-0.467842	779
GGCUA	1589	4408	27	0.000498716	0.000504912	0.000384747	-0.374309	-0.392122	26723	34323	26643	0.00053446	0.00068646	0.00053286	-0.0998634	590	-0.443144	796	-0.469847	780
GUUCG	1415	4543	27	0.000444105	0.000520376	0.000384747	-0.206992	-0.435643	26710	33023	26664	0.0005342	0.00066046	0.00053328	-0.266479	774	-0.343918	723	-0.470983	781
AUCCU	3005	10024	54	0.000943135	0.00114819	0.000769494	-0.293555	-0.577384	53694	53170	53350	0.00107388	0.0010634	0.001067	-0.187296	682	0.110682	395	-0.471578	782
UAUAG	4729	7008	99	0.00148422	0.000802728	0.00141074	-0.0732557	0.813468	97729	85266	97937	0.00195458	0.00170532	0.00195874	-0.397152	897	-1.08706	1017	-0.473475	783
AGCAU	3171	9731	53	0.000995235	0.00111463	0.000755244	-0.398095	-0.561553	52413	54630	52530	0.00104826	0.0010926	0.0010506	-0.0748874	569	0.0288024	445	-0.476199	784
UUCGG	1676	5171	27	0.000526021	0.000592309	0.000384747	-0.451212	-0.622441	26443	33210	26796	0.00052886	0.0006642	0.00053592	-0.0077643	495	-0.165267	600	-0.478108	785
GUAUU	5503	12324	99	0.00172715	0.00141165	0.00141074	-0.291939	-0.000927551	98179	83229	98338	0.00196358	0.00166458	0.00196676	-0.185097	679	-0.23778	655	-0.47937	786
UGUAG	2924	7319	51	0.000917713	0.000838351	0.000726744	-0.336595	-0.206107	50410	52958	50690	0.0010082	0.00105916	0.0010138	-0.135667	628	-0.337294	720	-0.480254	787
GUCAA	2790	11076	52	0.000875656	0.00126869	0.000740994	-0.240903	-0.775811	51972	54490	51778	0.00103944	0.0010898	0.00103556	-0.24737	749	0.219281	308	-0.482877	788
CUGUA	3034	7541	52	0.000952237	0.00086378	0.000740994	-0.361859	-0.221202	52302	52990	51834	0.00104604	0.0010598	0.00103668	-0.135546	627	-0.295057	691	-0.484437	789
AUCAC	2848	8619	54	0.00089386	0.000987259	0.000769494	-0.216139	-0.359518	54067	54522	53873	0.00108134	0.00109044	0.00107746	-0.2747	786	-0.14341	579	-0.485653	790
UCACU	3333	8403	53	0.00104608	0.000962517	0.000755244	-0.469978	-0.34987	53853	53170	52975	0.00107706	0.0010634	0.0010595	-0.042106	535	-0.1438	580	-0.488369	791
GAUAC	2336	7501	52	0.000733166	0.000859198	0.000740994	0.0153223	-0.213529	52442	54831	52028	0.00104884	0.00109662	0.00104056	-0.516583	953	-0.352001	729	-0.489826	792
CGGCA	1204	4251	14	0.000377882	0.000486929	0.000199498	-0.921558	-1.28733	14281	21814	14026	0.00028562	0.00043628	0.00028052	0.403838	162	0.158456	367	-0.491726	793
UUAUA	9757	11389	192	0.00306229	0.00130455	0.00273598	-0.162552	1.06851	191071	132916	192405	0.00382142	0.00265832	0.0038481	-0.3195	828	-1.02697	1012	-0.49209	794
GGCCU	1156	4249	14	0.000362817	0.000486699	0.000199498	-0.862864	-1.28665	14082	21550	14142	0.00028164	0.000431	0.00028284	0.365389	185	0.175343	346	-0.503609	795
AGACC	1309	5861	27	0.000410837	0.000671345	0.000384747	-0.0946547	-0.803145	27557	35293	27359	0.00055114	0.00070586	0.00054718	-0.423854	916	-0.0723275	518	-0.508106	796
GCUCG	902	2633	14	0.000283097	0.000301596	0.000199498	-0.504922	-0.596238	14239	21370	14207	0.00028478	0.0004274	0.00028414	-0.00854907	496	-0.502972	836	-0.510225	797
GUACU	2841	7021	51	0.000891663	0.000804217	0.000726744	-0.295051	-0.146137	51827	53020	51770	0.00103654	0.0010604	0.0010354	-0.217206	709	-0.398952	761	-0.510669	798
GUCGU	1301	4982	26	0.000408326	0.000570661	0.000370497	-0.140258	-0.623171	26797	33367	26394	0.00053594	0.00066734	0.00052788	-0.392351	888	-0.225789	649	-0.510748	799
CAUAC	3149	6341	53	0.00098833	0.000726326	0.000755244	-0.38805	0.0563246	54053	54434	53837	0.00108106	0.00108868	0.00107674	-0.129382	620	-0.58389	882	-0.511655	800
UAAGA	4866	9560	97	0.00152722	0.00109505	0.00138224	-0.143901	0.336017	98187	87090	98668	0.00196374	0.0017418	0.00197336	-0.362696	863	-0.669589	914	-0.513647	801
UAAUU	8341	14618	188	0.00261787	0.00167441	0.00267898	0.0332914	0.678029	191165	132763	191322	0.0038233	0.00265526	0.00382644	-0.546427	965	-0.665199	913	-0.51432	802
UAUCG	2372	7307	51	0.000744465	0.000836976	0.000726744	-0.0347558	-0.203739	51716	53187	51931	0.00103432	0.00106374	0.00103862	-0.474407	943	-0.345887	725	-0.515148	803
CGGGC	631	1651	7	0.000198043	0.000189113	9.97492e-05	-0.989434	-0.922871	7345	13668	7147	0.0001469	0.00027336	0.00014294	0.430977	149	-0.531554	851	-0.519032	804
AGGCC	1142	4299	14	0.000358423	0.000492427	0.000199498	-0.845285	-1.30353	14393	21948	14306	0.00028786	0.00043896	0.00028612	0.316295	221	0.165819	357	-0.520243	805
UACGC	1593	3055	27	0.000499971	0.000349933	0.000384747	-0.377936	0.13683	27779	34495	27625	0.00055558	0.0006899	0.0005525	-0.152149	646	-0.979307	1002	-0.522065	806
CUCUA	2604	7699	52	0.000817279	0.000881878	0.000740994	-0.141367	-0.251117	53506	53754	53241	0.00107012	0.00107508	0.00106482	-0.388872	884	-0.285793	686	-0.523076	807
UCGCU	1706	4705	27	0.000535437	0.000538932	0.000384747	-0.476807	-0.486193	27588	33085	27707	0.00055176	0.0006617	0.00055414	-0.0433238	536	-0.296075	693	-0.526341	808
GCCGG	674	2268	7	0.000211538	0.000259787	9.97492e-05	-1.08454	-1.38095	7342	13575	7188	0.00014684	0.0002715	0.00014376	0.526675	92	-0.0636238	512	-0.527285	809
CGAGU	1044	3254	26	0.000327665	0.000372728	0.000370497	0.177241	-0.00866002	26581	34018	26758	0.00053162	0.00068036	0.00053516	-0.698174	1010	-0.868176	987	-0.530508	810
AGGGU	1784	5193	25	0.000559918	0.000594829	0.000356247	-0.652337	-0.739598	26129	34023	25729	0.00052258	0.00068046	0.00051458	0.0995631	390	-0.194034	627	-0.530517	811
AUCCG	1234	4635	27	0.000387297	0.000530914	0.000384747	-0.00953203	-0.464567	27809	34132	27794	0.00055618	0.00068264	0.00055588	-0.52211	954	-0.362648	733	-0.530864	812
UCGGA	1285	4453	26	0.000403304	0.000510067	0.000370497	-0.122406	-0.461223	26678	33728	26771	0.00053356	0.00067456	0.00053542	-0.403783	900	-0.403261	768	-0.531209	813
AUCGG	1287	4549	26	0.000403932	0.000521063	0.000370497	-0.124649	-0.491995	26613	34098	26802	0.00053226	0.00068196	0.00053604	-0.39802	899	-0.38823	755	-0.532879	814
AUUCC	3299	10788	52	0.00103541	0.00123571	0.000740994	-0.482666	-0.737801	53987	53447	53608	0.00107974	0.00106894	0.00107216	-0.0604839	554	0.209154	318	-0.532986	815
CUUGG	2052	10700	26	0.000644031	0.00122563	0.000370497	-0.797668	-1.72598	26810	33463	26807	0.0005362	0.00066926	0.00053614	0.264359	250	0.87288	18	-0.533148	816
CUGGU	1726	8886	26	0.000541714	0.00101784	0.000370497	-0.54807	-1.45798	26921	32666	26817	0.00053842	0.00065332	0.00053634	0.00879988	481	0.639652	72	-0.533686	817
UGGUC	1362	7421	26	0.000427471	0.000850034	0.000370497	-0.206364	-1.19806	26650	32827	26835	0.000533	0.00065654	0.0005367	-0.318309	826	0.372638	192	-0.534654	818
AGAUA	5166	12035	96	0.00162138	0.00137854	0.00136799	-0.245162	-0.0110872	98642	86888	99085	0.00197284	0.00173776	0.0019817	-0.283055	794	-0.334085	716	-0.534682	819
GUCUG	1365	5435	26	0.000428412	0.000622549	0.000370497	-0.209538	-0.748726	26698	33045	26875	0.00053396	0.0006609	0.0005375	-0.317731	825	-0.0862442	529	-0.536803	820
GCUAU	2924	6863	50	0.000917713	0.000786119	0.000712494	-0.365164	-0.141869	51791	53621	51790	0.00103582	0.00107242	0.0010358	-0.174659	671	-0.448051	799	-0.539795	821
UUAAU	7670	13991	185	0.00240727	0.00160259	0.00263623	0.131078	0.718069	189932	132809	191674	0.00379864	0.00265618	0.00383348	-0.658085	998	-0.728946	938	-0.540179	822
AGGUU	2750	9147	49	0.000863102	0.00104774	0.000698244	-0.305799	-0.585474	50329	52847	50785	0.00100658	0.00105694	0.0010157	-0.221859	715	-0.0126152	484	-0.54067	823
CUGCC	1450	5698	14	0.00045509	0.000652674	0.000199498	-1.18978	-1.70999	14621	21408	14532	0.00029242	0.00042816	0.00029064	0.63811	59	0.608213	86	-0.542856	824
CUAAA	5018	11324	98	0.00157493	0.0012971	0.00139649	-0.17348	0.106513	101560	87815	101737	0.0020312	0.0017563	0.00203474	-0.367049	866	-0.437248	788	-0.54304	825
AGCUA	2510	6332	50	0.000787777	0.000725296	0.000712494	-0.144908	-0.0256906	52119	54764	51921	0.00104238	0.00109528	0.00103842	-0.404023	901	-0.594659	887	-0.54344	826
AGUAU	5261	9997	95	0.00165119	0.0011451	0.00135374	-0.286559	0.241475	98028	85005	98686	0.00196056	0.0017001	0.00197372	-0.247757	750	-0.570145	874	-0.543968	827
UCGAU	2261	8196	50	0.000709627	0.000938806	0.000712494	0.00581806	-0.397949	52044	53391	51984	0.00104088	0.00106782	0.00103968	-0.552671	967	-0.185769	617	-0.545189	828
AGUUA	4035	8679	95	0.00126641	0.000994131	0.00135374	0.0962098	0.445441	97757	84415	98995	0.00195514	0.0016883	0.0019799	-0.626532	989	-0.764063	952	-0.548478	829
AAAUC	5421	18370	97	0.00170141	0.00210418	0.00138224	-0.299723	-0.606252	100934	88069	101195	0.00201868	0.00176138	0.0020239	-0.246682	746	0.256553	290	-0.550131	830
AUACG	2861	5346	50	0.00089794	0.000612355	0.000712494	-0.33374	0.218511	52347	54833	52221	0.00104694	0.00109666	0.00104442	-0.221488	714	-0.840677	980	-0.551752	831
CGGCG	780	2149	7	0.000244807	0.000246156	9.97492e-05	-1.29527	-1.3032	7305	13676	7321	0.0001461	0.00027352	0.00014642	0.744689	33	-0.152073	588	-0.553735	832
ACUAC	2895	7030	51	0.000908611	0.000805248	0.000726744	-0.322215	-0.147985	53611	55001	53427	0.00107222	0.00110002	0.00106854	-0.238866	739	-0.450025	801	-0.556121	833
GGUUG	1714	7277	25	0.000537948	0.00083354	0.000356247	-0.594588	-1.22637	25978	33089	26266	0.00051956	0.00066178	0.00052532	0.0501762	438	0.3329	222	-0.560318	834
CACGU	1618	3720	26	0.000507818	0.000426105	0.000370497	-0.454849	-0.201748	27527	34209	27346	0.00055054	0.00068418	0.00054692	-0.116536	603	-0.683166	923	-0.561868	835
CUACA	2884	7213	51	0.000905159	0.000826209	0.000726744	-0.316723	-0.18506	53999	54860	53666	0.00107998	0.0010972	0.00107332	-0.254762	755	-0.409247	773	-0.562561	836
CGGUU	1463	4631	25	0.00045917	0.000530455	0.000356247	-0.366151	-0.574353	27053	33167	26314	0.00054106	0.00066334	0.00052628	-0.236759	737	-0.322517	706	-0.562952	837
GGCGU	996	3244	13	0.0003126	0.000371582	0.000185249	-0.754855	-1.00422	13967	21332	13707	0.00027934	0.00042664	0.00027414	0.162295	328	-0.199338	633	-0.565451	838
UCGGG	782	2167	13	0.000245435	0.000248218	0.000185249	-0.405878	-0.422145	13936	21212	13714	0.00027872	0.00042424	0.00027428	-0.183477	678	-0.773274	955	-0.566187	839
CCGAU	1199	4600	26	0.000376312	0.000526905	0.000370497	-0.0224691	-0.50808	27559	34201	27522	0.00055118	0.00068402	0.00055044	-0.550592	966	-0.376497	743	-0.571123	840
GUGCG	1083	2164	13	0.000339905	0.000247874	0.000185249	-0.875671	-0.420146	13768	20932	13767	0.00027536	0.00041864	0.00027534	0.303814	231	-0.756102	947	-0.571752	841
GUCAC	1691	5214	26	0.000530729	0.000597235	0.000370497	-0.518514	-0.688836	27610	34098	27584	0.0005522	0.00068196	0.00055168	-0.0572148	551	-0.191389	626	-0.57437	842
CGCGU	985	1383	13	0.000309147	0.000158415	0.000185249	-0.738833	0.225753	14224	21358	13803	0.00028448	0.00042716	0.00027606	0.119968	369	-1.43107	1023	-0.57552	843
GAUCG	1126	4032	25	0.000353401	0.000461843	0.000356247	0.0115722	-0.374525	27172	34029	26610	0.00054344	0.00068058	0.0005322	-0.620815	986	-0.559361	866	-0.57909	844
AAGAC	3068	11027	49	0.000962908	0.00126308	0.000698244	-0.463666	-0.855144	52202	56424	52227	0.00104404	0.00112848	0.00104454	-0.116707	604	0.162567	362	-0.581064	845
UAAAC	4967	10106	95	0.00155892	0.00115759	0.00135374	-0.203596	0.22583	101710	88001	101279	0.0020342	0.00176002	0.00202558	-0.383915	882	-0.604472	890	-0.581385	846
AGGCG	1125	3422	13	0.000353087	0.000391971	0.000185249	-0.930562	-1.08129	13949	21805	13862	0.00027898	0.0004361	0.00027724	0.339863	204	-0.153911	590	-0.581673	847
CGGCC	711	2186	7	0.000223151	0.000250394	9.97492e-05	-1.16164	-1.32782	7685	13640	7487	0.0001537	0.0002728	0.00014974	0.537904	88	-0.123642	565	-0.586082	848
ACUUA	3856	7280	94	0.00121023	0.000833884	0.00133949	0.146407	0.683765	101462	85302	100701	0.00202924	0.00170604	0.00201402	-0.745663	1016	-1.03273	1013	-0.588395	849
ACUCU	2615	8175	50	0.000820732	0.000936401	0.000712494	-0.204032	-0.394248	53919	53593	53605	0.00107838	0.00107186	0.0010721	-0.393883	891	-0.194918	628	-0.589489	850
GUAGA	2694	8226	47	0.000845526	0.000942243	0.000669745	-0.336238	-0.492488	50540	54052	50463	0.0010108	0.00108104	0.00100926	-0.257576	761	-0.198249	631	-0.591615	851
CUCAC	1661	4438	26	0.000521314	0.000508348	0.000370497	-0.492689	-0.456355	28456	34212	27945	0.00056912	0.00068424	0.0005589	-0.126581	616	-0.428685	783	-0.593128	852
AGAUU	4312	15026	92	0.00135334	0.00172115	0.00131099	-0.0458724	-0.392713	98245	84905	98978	0.0019649	0.0016981	0.00197956	-0.537927	962	0.0194474	453	-0.594524	853
CACGG	847	2886	13	0.000265835	0.000330575	0.000185249	-0.521071	-0.835517	14296	21773	14016	0.00028592	0.00043546	0.00028032	-0.105078	595	-0.397561	760	-0.597613	854
GGCUC	1069	4430	13	0.000335511	0.000507432	0.000185249	-0.856899	-1.45375	14312	21241	14063	0.00028624	0.00042482	0.00028126	0.229136	279	0.256363	291	-0.602442	855
UAUCU	5135	11906	93	0.00161165	0.00136377	0.00132524	-0.282283	-0.0413436	101152	83409	100817	0.00202304	0.00166818	0.00201634	-0.327989	837	-0.290678	689	-0.605486	856
UAGUU	4853	9285	91	0.00152314	0.00106355	0.00129674	-0.232159	0.286007	97686	82585	98652	0.00195372	0.0016517	0.00197304	-0.359176	860	-0.63507	900	-0.605531	857
CGGUC	692	2512	13	0.000217188	0.000287736	0.000185249	-0.229481	-0.635282	14292	21370	14113	0.00028584	0.0004274	0.00028226	-0.396264	895	-0.570843	876	-0.607563	858
CGCUG	1189	4465	13	0.000373174	0.000511441	0.000185249	-1.01039	-1.46511	14199	21236	14139	0.00028398	0.00042472	0.00028278	0.394059	169	0.268056	281	-0.610218	859
UAUAU	17219	12801	176	0.00540427	0.00146628	0.00250798	-1.10757	0.774362	190461	132812	191597	0.00380922	0.00265624	0.00383194	0.504605	109	-0.857221	985	-0.611549	860
AUAGG	2578	5196	47	0.000809119	0.000595173	0.000669745	-0.272741	0.170302	50450	54206	51183	0.001009	0.00108412	0.00102366	-0.318503	827	-0.865143	986	-0.612054	861
ACACC	1970	6832	26	0.000618295	0.000782568	0.000370497	-0.738833	-1.07875	28734	35241	28318	0.00057468	0.00070482	0.00056636	0.105536	384	0.150961	372	-0.612257	862
AUCCC	1508	5265	26	0.000473294	0.000603077	0.000370497	-0.353274	-0.702879	28573	34117	28348	0.00057146	0.00068234	0.00056696	-0.271917	780	-0.178149	608	-0.613785	863
GGUGU	1842	6645	24	0.000578121	0.000761148	0.000341997	-0.757388	-1.15419	26001	33129	26174	0.00052002	0.00066258	0.00052348	0.152805	336	0.200082	323	-0.61415	864
UACCG	1430	5669	25	0.000448813	0.000649353	0.000356247	-0.333236	-0.866124	27789	34339	27279	0.00055578	0.00068678	0.00054558	-0.308399	813	-0.080846	523	-0.614912	865
ACUGC	2213	6559	25	0.000694562	0.000751297	0.000356247	-0.963224	-1.07651	28055	34225	27306	0.0005611	0.0006845	0.00054612	0.307845	226	0.134333	383	-0.61634	866
UUGGU	3543	15170	46	0.00111199	0.00173764	0.000655495	-0.762487	-1.40647	50563	51493	50269	0.00101126	0.00102986	0.00100538	0.136989	351	0.754681	44	-0.617085	867
UGGUA	3244	12887	46	0.00101815	0.00147613	0.000655495	-0.635289	-1.17117	50331	53158	50550	0.00100662	0.00106316	0.001011	0.016426	474	0.473465	132	-0.625127	868
AUAAG	5155	8965	90	0.00161792	0.00102689	0.00128249	-0.335196	0.320664	98082	87064	98949	0.00196164	0.00174128	0.00197898	-0.277917	788	-0.761865	950	-0.62581	869
GUCGA	1037	4829	24	0.000325468	0.000553135	0.000341997	0.0714695	-0.693647	26897	34037	26455	0.00053794	0.00068074	0.0005291	-0.72493	1013	-0.299472	695	-0.629556	870
GUUGU	3229	11025	46	0.00101344	0.00126285	0.000655495	-0.628603	-0.94603	50302	51471	50730	0.00100604	0.00102942	0.0010146	0.0105711	480	0.294855	260	-0.630255	871
UACGG	1538	3931	24	0.000482709	0.000450274	0.000341997	-0.49717	-0.396819	27198	34124	26468	0.00054396	0.00068248	0.00052936	-0.172346	668	-0.599983	889	-0.630264	872
CAAUC	2688	9652	48	0.000843643	0.00110558	0.000683995	-0.302648	-0.692751	53496	54876	53152	0.00106992	0.00109752	0.00106304	-0.342798	850	0.0105604	461	-0.636139	873
GUUAG	2225	5891	46	0.000698328	0.000674781	0.000655495	-0.0913205	-0.0418361	50491	52822	50980	0.00100982	0.00105644	0.0010196	-0.532121	960	-0.646719	907	-0.637347	874
AUAGA	5352	10457	89	0.00167975	0.00119779	0.00126824	-0.405422	0.0824508	98514	87903	98734	0.00197028	0.00175806	0.00197468	-0.230151	727	-0.553608	862	-0.638791	875
CCGCU	1250	3948	13	0.000392319	0.000452222	0.000185249	-1.08257	-1.28757	14697	21327	14467	0.00029394	0.00042654	0.00028934	0.416506	158	0.0843487	410	-0.643304	876
CGCUA	1492	4330	25	0.000468272	0.000495978	0.000356247	-0.394468	-0.477396	27754	34213	27839	0.00055508	0.00068426	0.00055678	-0.245349	744	-0.46427	814	-0.644229	877
ACUUG	2989	10583	47	0.000938113	0.00121222	0.000669745	-0.486151	-0.855973	51674	53366	52406	0.00103348	0.00106732	0.00104812	-0.139676	635	0.183664	337	-0.646121	878
AGACG	1420	5375	24	0.000445674	0.000615677	0.000341997	-0.382006	-0.848188	26720	34743	26909	0.0005344	0.00069486	0.00053818	-0.26193	769	-0.17455	607	-0.654104	879
AUAGU	4808	8981	88	0.00150902	0.00102872	0.00125399	-0.267082	0.28567	98081	85137	98692	0.00196162	0.00170274	0.00197384	-0.378437	875	-0.727002	937	-0.654479	880
CAGCC	1298	4763	13	0.000407384	0.000545575	0.000185249	-1.13693	-1.55832	14761	22004	14609	0.00029522	0.00044008	0.00029218	0.464599	128	0.310013	245	-0.657395	881
UGAUC	2339	9200	46	0.000734107	0.00105381	0.000655495	-0.163407	-0.684957	52120	53143	51895	0.0010424	0.00106286	0.0010379	-0.505846	950	-0.012338	483	-0.663011	882
GGUGC	1310	5064	12	0.00041115	0.000580053	0.000170999	-1.26568	-1.7622	13866	21155	13559	0.00027732	0.0004231	0.00027118	0.568115	74	0.455186	140	-0.665266	883
UUAGG	2362	5390	45	0.000741326	0.000617395	0.000641245	-0.209233	0.0546823	50798	53251	50927	0.00101596	0.00106502	0.00101854	-0.454663	934	-0.786616	960	-0.667555	884
AAUCC	2637	9944	47	0.000827636	0.00113903	0.000669745	-0.305386	-0.766123	53965	54740	53222	0.0010793	0.0010948	0.00106444	-0.383027	880	0.0571386	430	-0.668412	885
AAGCU	3459	10233	46	0.00108563	0.00117213	0.000655495	-0.72787	-0.838481	52141	54292	52147	0.00104282	0.00108584	0.00104294	0.0580362	423	0.110325	396	-0.67	886
AUCAG	2574	9965	46	0.000807863	0.00114144	0.000655495	-0.301527	-0.800193	52114	55217	52306	0.00104228	0.00110434	0.00104612	-0.36756	867	0.0476651	435	-0.674392	887
UCUUA	4656	9627	89	0.00146131	0.00110272	0.00126824	-0.204435	0.201762	101457	82789	101330	0.00202914	0.00165578	0.0020266	-0.473606	941	-0.586445	883	-0.676234	888
UCUAU	5374	10154	89	0.00168666	0.00116308	0.00126824	-0.41134	0.124872	101133	83179	101426	0.00202266	0.00166358	0.00202852	-0.262086	771	-0.516335	842	-0.6776	889
AGACA	2947	9378	46	0.000924931	0.0010742	0.000655495	-0.496762	-0.712604	52313	56520	52486	0.00104626	0.0011304	0.00104972	-0.177823	675	-0.0735734	520	-0.679348	890
GACGG	901	3436	12	0.000282784	0.000393575	0.000170999	-0.725714	-1.20265	13791	22004	13693	0.00027582	0.00044008	0.00027386	0.0359714	454	-0.161128	597	-0.679454	891
ACUCA	2438	7050	47	0.000765179	0.000807538	0.000669745	-0.192186	-0.26992	53888	54561	53667	0.00107776	0.00109122	0.00107334	-0.494167	949	-0.434339	784	-0.680424	892
UUAGA	3876	11364	86	0.0012165	0.00130168	0.00122549	0.0106191	-0.0870196	97798	84856	98462	0.00195596	0.00169712	0.00196924	-0.685137	1006	-0.38271	748	-0.68428	893
ACGCU	1564	4448	24	0.00049087	0.000509494	0.000341997	-0.521355	-0.57508	27968	34093	27499	0.00055936	0.00068186	0.00054998	-0.188437	684	-0.420411	780	-0.685394	894
UCGUG	1428	4240	23	0.000448185	0.000485669	0.000327747	-0.451511	-0.567388	26831	32977	26468	0.00053662	0.00065954	0.00052936	-0.259805	765	-0.441488	795	-0.691665	895
AUAUA	17240	12737	167	0.00541086	0.00145895	0.00237973	-1.18506	0.705865	190165	136494	192413	0.0038033	0.00272988	0.00384826	0.508607	104	-0.903904	997	-0.693408	896
UCCGA	1347	4475	24	0.000422763	0.000512586	0.000341997	-0.305864	-0.583811	27503	34074	27720	0.00055006	0.00068148	0.0005544	-0.37974	876	-0.410876	776	-0.696942	897
UAGCU	2501	6213	45	0.000784952	0.000711665	0.000641245	-0.291729	-0.150322	52141	53516	52008	0.00104282	0.00107032	0.00104016	-0.409814	906	-0.588772	885	-0.697858	898
CUAGA	2162	6790	45	0.000678555	0.000777757	0.000641245	-0.0815906	-0.278444	52223	54927	52080	0.00104446	0.00109854	0.0010416	-0.622219	987	-0.498196	834	-0.699854	899
AAUCU	4297	15153	87	0.00134864	0.00173569	0.00123974	-0.121463	-0.485474	100886	85646	100951	0.00201772	0.00171292	0.00201902	-0.581225	974	0.0190534	455	-0.703618	900
CUUGA	3513	13445	45	0.00110257	0.00154005	0.000641245	-0.781928	-1.26403	52517	52989	52325	0.00105034	0.00105978	0.0010465	0.0700185	415	0.539213	114	-0.706625	901
CGGAU	1306	4580	23	0.000409895	0.000524614	0.000327747	-0.32267	-0.678671	26922	33836	26769	0.00053844	0.00067672	0.00053538	-0.393531	890	-0.367304	738	-0.707979	902
UUAGU	4595	8218	84	0.00144216	0.000941326	0.00119699	-0.268825	0.346645	98058	82342	98279	0.00196116	0.00164684	0.00196558	-0.443471	928	-0.806933	968	-0.715543	903
AUUAA	7879	14266	165	0.00247287	0.00163409	0.00235123	-0.0727675	0.524928	191036	136171	193121	0.00382072	0.00272342	0.00386242	-0.627661	991	-0.736931	941	-0.716089	904
GAUUC	2461	10720	44	0.000772398	0.00122792	0.000626995	-0.30089	-0.969687	52338	53226	51613	0.00104676	0.00106452	0.00103226	-0.438515	926	0.20601	322	-0.719281	905
UAAGG	2635	6863	43	0.000827009	0.000786119	0.000612745	-0.432615	-0.35946	50458	54496	50596	0.00100916	0.00108992	0.00101192	-0.287181	798	-0.471403	818	-0.723736	906
UGCCG	1222	4342	12	0.000383531	0.000497352	0.000170999	-1.16536	-1.54028	13905	21407	14120	0.0002781	0.00042814	0.0002824	0.46374	129	0.216185	310	-0.723755	907
GCCGA	1004	2937	12	0.000315111	0.000336417	0.000170999	-0.881874	-0.976266	14199	21891	14161	0.00028398	0.00043782	0.00028322	0.150069	339	-0.380087	746	-0.727938	908
ACGCG	1042	1390	12	0.000327037	0.000159217	0.000170999	-0.93547	0.102992	14476	21604	14162	0.00028952	0.00043208	0.00028324	0.175792	316	-1.44031	1024	-0.72804	909
UUAGC	2657	7362	44	0.000833913	0.000843276	0.000626995	-0.411444	-0.427552	52192	53360	52010	0.00104384	0.0010672	0.0010402	-0.323931	833	-0.339753	722	-0.730335	910
CUUAG	2127	5543	44	0.00066757	0.00063492	0.000626995	-0.0904655	-0.0181209	52216	53229	52066	0.00104432	0.00106458	0.00104132	-0.645572	994	-0.745638	944	-0.731888	911
GUUGG	2185	9308	22	0.000685774	0.00106618	0.000313497	-1.12928	-1.76593	26016	32819	26062	0.00052032	0.00065638	0.00052124	0.398334	165	0.699848	55	-0.733494	912
ACCGU	1611	5470	23	0.000505621	0.000626558	0.000327747	-0.625472	-0.934864	27792	34682	27348	0.00055584	0.00069364	0.00054696	-0.136614	630	-0.146738	584	-0.738851	913
CGAUC	1060	3827	23	0.000332687	0.000438362	0.000327747	-0.0215794	-0.419537	27681	34187	27363	0.00055362	0.00068374	0.00054726	-0.734732	1015	-0.641326	904	-0.739642	914
CAGAU	2681	10573	44	0.000841446	0.00121108	0.000626995	-0.424417	-0.949767	52265	54409	52386	0.0010453	0.00108818	0.00104772	-0.312975	820	0.154375	370	-0.740727	915
CAGUC	1382	4822	23	0.000433748	0.000552333	0.000327747	-0.404273	-0.752955	27752	34044	27393	0.00055504	0.00068088	0.00054786	-0.355735	857	-0.301861	696	-0.741223	916
AAGUC	2300	8769	44	0.000721867	0.00100444	0.000626995	-0.203279	-0.679866	52038	54570	52417	0.00104076	0.0010914	0.00104834	-0.527832	958	-0.119788	560	-0.741581	917
ACCUA	2153	5203	45	0.00067573	0.000595975	0.000641245	-0.0755724	0.105624	53873	54854	53624	0.00107746	0.00109708	0.00107248	-0.673115	1004	-0.880345	991	-0.742003	918
CGACU	1176	3707	23	0.000369094	0.000424616	0.000327747	-0.171403	-0.373576	27887	34205	27417	0.00055774	0.0006841	0.00054834	-0.595605	980	-0.688047	925	-0.742486	919
CCGUA	1524	3851	23	0.000478315	0.000441111	0.000327747	-0.545378	-0.428557	27640	34106	27431	0.0005528	0.00068212	0.00054862	-0.208795	700	-0.628885	898	-0.743223	920
CCUAG	1112	3013	23	0.000349007	0.000345122	0.000327747	-0.090672	-0.0745242	27711	34154	27437	0.00055422	0.00068308	0.00054874	-0.667203	1002	-0.984946	1007	-0.743539	921
GCUGC	1674	6930	12	0.000525394	0.000793793	0.000170999	-1.61941	-2.21478	14269	21507	14357	0.00028538	0.00043014	0.00028714	0.880515	19	0.883957	16	-0.74777	922
UAAAU	9222	15897	161	0.00289437	0.00182091	0.00229423	-0.33524	0.333349	189876	136111	192695	0.00379752	0.00272222	0.0038539	-0.391807	887	-0.580121	880	-0.748308	923
GUCUU	2902	11048	43	0.000910808	0.00126549	0.000612745	-0.57186	-1.04633	52583	51603	51853	0.00105166	0.00103206	0.00103706	-0.20745	698	0.294166	261	-0.75914	924
CUCGC	971	2351	12	0.000304753	0.000269294	0.000170999	-0.833658	-0.655198	14753	21419	14584	0.00029506	0.00042838	0.00029168	0.0466343	441	-0.669709	915	-0.770402	925
UCGUA	2296	5872	43	0.000720612	0.000672605	0.000612745	-0.233935	-0.134473	51988	53722	52264	0.00103976	0.00107444	0.00104528	-0.528957	959	-0.675753	919	-0.770531	926
AGCUG	2086	7344	22	0.000654702	0.000841215	0.000313497	-1.06238	-1.42402	26756	34382	26760	0.00053512	0.00068764	0.0005352	0.290976	238	0.29082	264	-0.771624	927
GGUAA	3284	9804	41	0.0010307	0.00112299	0.000584245	-0.818979	-0.942704	50227	54304	50464	0.00100454	0.00108608	0.00100928	0.0370904	453	0.0482198	434	-0.78868	928
CUAUA	4839	6835	82	0.00151875	0.000782911	0.00116849	-0.378234	0.577725	101283	85076	101110	0.00202566	0.00170152	0.0020222	-0.415512	912	-1.1199	1018	-0.791279	929
CCUAC	1564	3884	23	0.00049087	0.000444891	0.000327747	-0.582756	-0.440867	28663	34360	28391	0.00057326	0.0006872	0.00056782	-0.22385	720	-0.627279	897	-0.792849	930
GGGUC	770	3494	11	0.000241669	0.000400218	0.000156749	-0.624576	-1.35233	14020	21134	13643	0.0002804	0.00042268	0.00027286	-0.214457	706	-0.0787785	522	-0.799707	931
AUCGC	1666	4434	22	0.000522883	0.00050789	0.000313497	-0.738034	-0.696063	27787	34345	27330	0.00055574	0.0006869	0.0005466	-0.0879223	582	-0.435584	785	-0.802032	932
GGUCG	647	2726	11	0.000203064	0.000312248	0.000156749	-0.373483	-0.994239	13816	21230	13665	0.00027632	0.0004246	0.0002733	-0.444403	929	-0.443411	797	-0.802032	933
AUCGA	2183	8337	42	0.000685146	0.000954957	0.000598495	-0.195072	-0.674096	51784	54941	52188	0.00103568	0.00109882	0.00104376	-0.596095	982	-0.202447	636	-0.802378	934
CGGUG	1122	4699	11	0.000352146	0.000538244	0.000156749	-1.16772	-1.77981	13680	21255	13736	0.0002736	0.0004251	0.00027472	0.364104	187	0.340459	217	-0.809508	935
CCUAA	2297	5268	43	0.000720926	0.00060342	0.000612745	-0.234563	0.0221239	53756	55154	53796	0.00107512	0.00110308	0.00107592	-0.576576	972	-0.870302	989	-0.812212	936
GACCU	1273	4947	22	0.000399538	0.000566651	0.000313497	-0.349878	-0.854008	27749	33808	27568	0.00055498	0.00067616	0.00055136	-0.474104	942	-0.254903	664	-0.814541	937
UCACG	1499	3924	22	0.000470469	0.000449472	0.000313497	-0.585646	-0.519779	27691	33977	27576	0.00055382	0.00067954	0.00055152	-0.235317	736	-0.596326	888	-0.814959	938
GUCAU	2881	9820	41	0.000904217	0.00112483	0.000584245	-0.630095	-0.945057	51797	52774	51919	0.00103594	0.00105548	0.00103838	-0.196199	687	0.0918035	405	-0.829688	939
CCUUA	2747	6790	42	0.00086216	0.000777757	0.000598495	-0.526617	-0.37798	53930	53779	53398	0.0010786	0.00107558	0.00106796	-0.323132	831	-0.467724	815	-0.835446	940
GCGUA	1594	3204	21	0.000500285	0.000367	0.000299248	-0.741411	-0.294442	26952	33887	26755	0.00053904	0.00067774	0.0005351	-0.107641	597	-0.88495	992	-0.838469	941
AAGGU	3319	10582	40	0.00104169	0.00121211	0.000569995	-0.869898	-1.0885	50615	54539	51021	0.0010123	0.00109078	0.00102042	0.041283	446	0.15216	371	-0.840141	942
UAUAA	9947	11344	151	0.00312192	0.00129939	0.00215173	-0.536934	0.727662	190836	135788	192986	0.00381672	0.00271576	0.00385972	-0.289901	801	-1.06352	1016	-0.842997	943
CUAGG	1096	3004	21	0.000343985	0.000344092	0.000299248	-0.201008	-0.201453	26782	34450	26848	0.00053564	0.000689	0.00053696	-0.638916	993	-1.00171	1009	-0.843475	944
CAGGU	1581	6502	21	0.000496205	0.000744768	0.000299248	-0.729597	-1.31545	26733	33899	26886	0.00053466	0.00067798	0.00053772	-0.107685	598	0.135549	381	-0.845515	945
GACCG	665	2654	11	0.000208714	0.000304001	0.000156749	-0.413072	-0.955622	14089	21789	14088	0.00028178	0.00043578	0.00028176	-0.433044	919	-0.519524	843	-0.846013	946
CCGGU	834	3783	11	0.000261755	0.000433322	0.000156749	-0.739765	-1.46698	14127	21031	14113	0.00028254	0.00042062	0.00028226	-0.110236	599	0.0429211	437	-0.848571	947
CGCGA	910	1606	11	0.000285608	0.000183958	0.000156749	-0.865584	-0.230926	14366	22081	14123	0.00028732	0.00044162	0.00028246	-0.00862055	497	-1.26343	1020	-0.849593	948
GGUAG	1790	6084	20	0.000561801	0.000696889	0.000284998	-0.979109	-1.28998	26269	33929	25855	0.00052538	0.00067858	0.0005171	0.0966977	391	0.038409	441	-0.859493	949
CUAUC	2704	7565	41	0.000848665	0.000866529	0.000584245	-0.53862	-0.568674	54087	53537	53183	0.00108174	0.00107074	0.00106366	-0.350087	854	-0.305288	699	-0.864391	950
CGUAA	2605	5143	40	0.000817593	0.000589102	0.000569995	-0.520432	-0.0475675	52066	54929	51995	0.00104132	0.00109858	0.0010399	-0.348959	853	-0.89905	995	-0.867423	951
GACGC	1025	3154	11	0.000321702	0.000361273	0.000156749	-1.03727	-1.20464	14241	22005	14319	0.00028482	0.0004401	0.00028638	0.175673	317	-0.284741	684	-0.869477	952
UACUC	2543	5975	41	0.000798134	0.000684403	0.000584245	-0.450057	-0.228272	54002	53321	53419	0.00108004	0.00106642	0.00106838	-0.436382	924	-0.639857	903	-0.870779	953
UUGGG	1840	8647	20	0.000577494	0.000990466	0.000284998	-1.01885	-1.79716	26216	32813	26090	0.00052432	0.00065626	0.0005218	0.139358	348	0.59384	94	-0.872547	954
GACAU	2495	8739	40	0.000783069	0.001001	0.000569995	-0.458189	-0.812426	52281	54731	52193	0.00104562	0.00109462	0.00104386	-0.417148	913	-0.128982	571	-0.872906	955
CCCGU	907	2712	11	0.000284667	0.000310645	0.000156749	-0.86082	-0.986811	14466	21416	14686	0.00028932	0.00042832	0.00029372	-0.0233922	517	-0.463424	813	-0.905988	956
UAAUC	3683	8549	76	0.00115593	0.000979241	0.00108299	-0.094031	0.145286	101787	85484	101492	0.00203574	0.00170968	0.00202984	-0.816501	1022	-0.803991	967	-0.906344	957
AGUCA	2540	7841	39	0.000797192	0.000898143	0.000555746	-0.520503	-0.692521	52507	54791	52192	0.00105014	0.00109582	0.00104384	-0.397582	898	-0.286994	687	-0.909404	958
CGUAG	1291	3572	20	0.000405187	0.000409153	0.000284998	-0.507638	-0.521689	26996	34011	26895	0.00053992	0.00068022	0.0005379	-0.414157	909	-0.733362	940	-0.916388	959
GAGUC	1051	4801	20	0.000329862	0.000549928	0.000284998	-0.210912	-0.948292	26877	33950	27057	0.00053754	0.000679	0.00054114	-0.70451	1012	-0.304169	698	-0.925052	960
UCUAA	3798	11613	75	0.00119202	0.0013302	0.00106874	-0.157498	-0.315736	100962	85552	101868	0.00201924	0.00171104	0.00203736	-0.760401	1018	-0.363225	734	-0.930788	961
GACUC	1124	4601	20	0.000352773	0.000527019	0.000284998	-0.307791	-0.886905	27615	34447	27229	0.0005523	0.00068894	0.00054458	-0.646711	995	-0.386523	750	-0.934194	962
CUCGU	1436	4490	20	0.000450696	0.000514305	0.000284998	-0.661205	-0.851673	27521	33411	27255	0.00055042	0.00066822	0.0005451	-0.288378	799	-0.3777	745	-0.935571	963
UGACC	1353	6342	20	0.000424646	0.000726441	0.000284998	-0.575311	-1.3499	27649	34242	27452	0.00055298	0.00068484	0.00054904	-0.380966	877	0.0850787	409	-0.945961	964
CUACG	1333	3593	20	0.000418369	0.000411558	0.000284998	-0.553826	-0.530146	27777	34175	27470	0.00055554	0.0006835	0.0005494	-0.409115	904	-0.731845	939	-0.946907	965
UAGUA	5194	8528	71	0.00163016	0.000976835	0.00101174	-0.688176	0.0506542	98273	84977	98872	0.00196546	0.00169954	0.00197744	-0.26985	779	-0.798957	966	-0.966793	966
GGUAU	2743	8932	36	0.000860905	0.00102311	0.000512996	-0.746907	-0.995944	49827	52848	50351	0.00099654	0.00105696	0.00100702	-0.211074	701	-0.0469579	500	-0.973073	967
GUAGU	3098	7232	36	0.000972324	0.000828386	0.000512996	-0.922489	-0.691355	50649	52853	50365	0.00101298	0.00105706	0.0010073	-0.0590972	552	-0.351683	728	-0.973474	968
GGUCU	1254	5737	19	0.000393575	0.000657142	0.000270748	-0.539687	-1.27925	26959	32869	26604	0.00053918	0.00065738	0.00053208	-0.45413	933	-0.000523275	471	-0.974693	969
CGACG	802	3377	10	0.000251712	0.000386817	0.000142499	-0.820823	-1.4407	14144	21955	14017	0.00028288	0.0004391	0.00028034	-0.168417	660	-0.1829	614	-0.976227	970
GGUUC	1602	7415	19	0.000502796	0.000849347	0.000270748	-0.893024	-1.6494	27272	33110	26647	0.00054544	0.0006622	0.00053294	-0.117447	606	0.359087	202	-0.977023	971
UUAAG	4100	7979	70	0.00128681	0.00091395	0.000997492	-0.367418	0.12619	98127	84830	98338	0.00196254	0.0016966	0.00196676	-0.608927	984	-0.892459	993	-0.979444	972
AGGUA	2786	7495	36	0.000874401	0.000858511	0.000512996	-0.769347	-0.742889	50525	53998	50772	0.0010105	0.00107996	0.00101544	-0.208703	699	-0.33107	713	-0.985086	973
GCGGC	1056	2916	5	0.000331431	0.000334012	7.12494e-05	-2.21776	-2.22895	7270	13627	7056	0.0001454	0.00027254	0.00014112	1.18868	3	0.293431	262	-0.985972	974
CUCGG	791	2238	10	0.00024826	0.000256351	0.000142499	-0.800899	-0.847167	14265	21096	14117	0.0002853	0.00042192	0.00028234	-0.200631	691	-0.718852	934	-0.986483	975
ACGGU	1554	5492	19	0.000487731	0.000629078	0.000270748	-0.849136	-1.21629	26753	33686	26854	0.00053506	0.00067372	0.00053708	-0.133615	625	-0.0989097	541	-0.988187	976
AACCC	1570	6002	20	0.000492753	0.000687496	0.000284998	-0.789914	-1.2704	28755	35902	28466	0.0005751	0.00071804	0.00056932	-0.222949	718	-0.0627131	511	-0.998289	977
AGUCG	1108	4009	19	0.000347752	0.000459209	0.000270748	-0.361108	-0.7622	26656	33905	27070	0.00053312	0.0006781	0.0005414	-0.616403	985	-0.562348	869	-0.999745	978
UAAGU	3849	7098	69	0.00120803	0.000813037	0.000983242	-0.297036	0.274226	97949	84449	98536	0.00195898	0.00168898	0.00197072	-0.697448	1009	-1.05476	1014	-1.0031	979
GUCCU	1571	5555	19	0.000493067	0.000636295	0.000270748	-0.864833	-1.23274	27796	33366	27359	0.00055592	0.00066732	0.00054718	-0.173095	669	-0.0686841	516	-1.01507	980
AGUCU	1938	6862	36	0.000608252	0.000786004	0.000512996	-0.245721	-0.61559	51831	53762	51860	0.00103662	0.00107524	0.0010372	-0.769147	1019	-0.45205	803	-1.01567	981
UCUAG	2134	6846	36	0.000669767	0.000784171	0.000512996	-0.384712	-0.612222	52517	53154	51973	0.00105034	0.00106308	0.00103946	-0.649125	996	-0.439009	790	-1.01882	982
GACCC	778	3691	10	0.000244179	0.000422784	0.000142499	-0.776991	-1.56897	14760	21859	14440	0.0002952	0.00043718	0.0002888	-0.273751	783	-0.0483079	504	-1.01912	983
UCGAC	1117	4838	19	0.000350576	0.000554166	0.000270748	-0.372779	-1.03337	27851	34187	27562	0.00055702	0.00068374	0.00055124	-0.668001	1003	-0.303129	697	-1.02573	984
UAGAC	1812	5624	36	0.000568706	0.000644198	0.000512996	-0.148735	-0.328557	51844	54439	52370	0.00103688	0.00108878	0.0010474	-0.866495	1023	-0.757136	948	-1.02979	985
CCGUC	951	3481	10	0.000298476	0.000398729	0.000142499	-1.06667	-1.48446	14630	21325	14639	0.0002926	0.0004265	0.00029278	0.0286869	461	-0.0971362	540	-1.03887	986
CGCGG	733	1200	5	0.000230056	0.000137453	7.12494e-05	-1.69103	-0.947992	7366	13552	7344	0.00014732	0.00027104	0.00014688	0.643031	57	-0.979564	1003	-1.04369	987
UCGGU	1338	4852	18	0.000419938	0.00055577	0.000256498	-0.71123	-1.11554	26992	33459	26668	0.00053984	0.00066918	0.00053336	-0.362354	862	-0.267907	673	-1.05616	988
CUAAG	2059	5533	35	0.000646228	0.000633775	0.000498746	-0.373738	-0.345664	52171	54598	52082	0.00104342	0.00109196	0.00104164	-0.691205	1007	-0.784878	959	-1.06248	989
UAAGC	2682	5343	35	0.00084176	0.000612011	0.000498746	-0.755103	-0.295252	51915	54081	52539	0.0010383	0.00108162	0.00105078	-0.302743	809	-0.821564	970	-1.07508	990
CGUCU	1426	5323	18	0.000447558	0.00060972	0.000256498	-0.803126	-1.2492	27714	33267	27221	0.00055428	0.00066534	0.00054442	-0.308542	814	-0.125944	567	-1.08577	991
CUUAA	4079	7996	67	0.00128022	0.000915898	0.000954742	-0.423203	0.0599252	101363	85375	101340	0.00202726	0.0017075	0.0020268	-0.663144	1001	-0.898627	994	-1.08602	992
GUCGG	676	2579	9	0.000212166	0.00029541	0.000128249	-0.726247	-1.20377	14082	20863	13632	0.00028164	0.00041726	0.00027264	-0.408658	903	-0.498227	835	-1.08805	993
CUUGC	2540	7763	18	0.000797192	0.000889209	0.000256498	-1.63598	-1.79357	27726	33571	27503	0.00055452	0.00067142	0.00055006	0.523688	93	0.405307	168	-1.10064	994
AAUCG	2214	6806	34	0.000694876	0.00077959	0.000484496	-0.52027	-0.68623	52089	54656	51978	0.00104178	0.00109312	0.00103956	-0.584224	975	-0.487665	825	-1.10142	995
ACGUC	1334	4705	18	0.000418683	0.000538932	0.000256498	-0.706911	-1.07116	27527	34495	27520	0.00055054	0.0006899	0.0005504	-0.394989	893	-0.356285	730	-1.10153	996
GAUCC	1178	6265	18	0.000369722	0.000717621	0.000256498	-0.527492	-1.48427	27781	34164	27830	0.00055562	0.00068328	0.0005566	-0.58766	977	0.0707454	422	-1.11769	997
CCUGG	999	4847	9	0.000313541	0.000555197	0.000128249	-1.28971	-2.11405	14131	20952	13978	0.00028262	0.00041904	0.00027956	0.149792	341	0.405912	167	-1.12421	998
GCGAC	902	2695	9	0.000283097	0.000308697	0.000128249	-1.14235	-1.26725	14333	21779	14007	0.00028666	0.00043558	0.00028014	-0.0180419	510	-0.496745	832	-1.1272	999
CCCUA	1451	3396	18	0.000455404	0.000388993	0.000256498	-0.8282	-0.600797	28611	34542	28105	0.00057222	0.00069084	0.0005621	-0.329423	839	-0.828607	973	-1.13188	1000
CGAGC	933	2628	9	0.000292827	0.000301023	0.000128249	-1.1911	-1.23093	14151	21678	14055	0.00028302	0.00043356	0.0002811	0.0491444	439	-0.526359	847	-1.13214	1001
UCGCG	949	1611	9	0.000297849	0.000184531	0.000128249	-1.21563	-0.524917	14324	21199	14081	0.00028648	0.00042398	0.00028162	0.056145	429	-1.20013	1019	-1.1348	1002
GGUCA	1410	6238	17	0.000442536	0.000714528	0.000242248	-0.869309	-1.56051	26768	34100	26754	0.00053536	0.000682	0.00053508	-0.274715	787	0.0672196	425	-1.14327	1003
CUAGU	2423	5334	33	0.000760471	0.00061098	0.000470246	-0.693477	-0.377709	51854	53098	52157	0.00103708	0.00106196	0.00104314	-0.447561	930	-0.797532	965	-1.14944	1004
ACUCG	1177	3206	17	0.000369408	0.00036723	0.000242248	-0.608729	-0.600197	27572	34355	27425	0.00055144	0.0006871	0.0005485	-0.57799	973	-0.903838	996	-1.17901	1005
AUCUA	3886	10145	63	0.00121964	0.00116205	0.000897743	-0.442083	-0.372303	101368	85382	101698	0.00202736	0.00170764	0.00203396	-0.733145	1014	-0.555327	863	-1.17992	1006
GCCCU	1384	3955	9	0.000434376	0.000453023	0.000128249	-1.76	-1.82064	14789	21461	14608	0.00029578	0.00042922	0.00029216	0.554419	80	0.0778682	417	-1.18781	1007
ACCCG	1018	2349	9	0.000319505	0.000269065	0.000128249	-1.31689	-1.06901	14641	22069	14665	0.00029282	0.00044138	0.0002933	0.125823	361	-0.714067	933	-1.19343	1008
AGACU	1954	6879	32	0.000613273	0.000787951	0.000455996	-0.427508	-0.789084	52448	54189	52343	0.00104896	0.00108378	0.00104686	-0.774358	1020	-0.459893	811	-1.19897	1009
UCUUG	4483	16270	31	0.00140701	0.00186364	0.000441746	-1.67135	-2.07683	51685	51890	51647	0.0010337	0.0010378	0.00103294	0.444818	141	0.844594	28	-1.22547	1010
CGGUA	1575	5807	16	0.000494322	0.00066516	0.000227998	-1.11643	-1.54468	26792	34343	26693	0.00053584	0.00068686	0.00053386	-0.116351	602	-0.0463153	499	-1.22744	1011
CAGAC	1354	5494	16	0.00042496	0.000629307	0.000227998	-0.898305	-1.46474	27902	34977	27581	0.00055804	0.00069954	0.00055162	-0.393041	889	-0.152642	589	-1.27465	1012
UAGAU	3968	10089	57	0.00124538	0.00115564	0.000812244	-0.616599	-0.508707	98274	84721	98840	0.00196548	0.00169442	0.0019768	-0.658298	999	-0.552101	861	-1.28318	1013
GUCCG	701	2220	8	0.000220013	0.000254289	0.000113999	-0.948563	-1.15745	14401	21295	13983	0.00028802	0.0004259	0.00027966	-0.388583	883	-0.744047	943	-1.29465	1014
CGUCG	787	3263	8	0.000247004	0.000373759	0.000113999	-1.11551	-1.71308	14101	21412	14116	0.00028202	0.00042824	0.00028232	-0.191263	686	-0.196313	629	-1.30831	1015
GUCUA	1729	5511	29	0.000542656	0.000631255	0.000413247	-0.393034	-0.611219	52264	53233	51969	0.00104528	0.00106466	0.00103938	-0.94578	1024	-0.754099	946	-1.33065	1016
AGCCC	1156	3580	8	0.000362817	0.000410069	0.000113999	-1.67022	-1.84685	14656	21959	14464	0.00029312	0.00043918	0.00028928	0.307749	227	-0.098945	542	-1.34344	1017
CGCGC	911	964	4	0.000285922	0.000110421	5.69995e-05	-2.3266	-0.953991	7692	13528	7424	0.00015384	0.00027056	0.00014848	0.894192	17	-1.29294	1021	-1.38125	1018
AGUCC	1170	4594	14	0.000367211	0.000526217	0.000199498	-0.880231	-1.39928	27745	34182	27421	0.0005549	0.00068364	0.00054842	-0.59562	981	-0.377578	744	-1.4589	1019
AGGUC	1275	5040	13	0.000400165	0.000577304	0.000185249	-1.11113	-1.63987	27035	34174	26915	0.0005407	0.00068348	0.0005383	-0.434232	922	-0.243568	659	-1.53895	1020
UAGGU	2148	5492	24	0.000674161	0.000629078	0.000341997	-0.979109	-0.879255	50604	53210	51000	0.00101208	0.0010642	0.00102	-0.586158	976	-0.758458	949	-1.57651	1021
UAGUC	2033	4912	21	0.000638068	0.000562642	0.000299248	-1.09237	-0.910879	51792	53294	52442	0.00103584	0.00106588	0.00104884	-0.69902	1011	-0.921755	1000	-1.80938	1022
CCGCG	702	1241	2	0.000220326	0.00014215	2.84998e-05	-2.95062	-2.31839	7620	13728	7511	0.0001524	0.00027456	0.00015022	0.531779	90	-0.949711	1001	-2.39805	1023
CGGGG	549	1360	1	0.000172307	0.00015578	1.42499e-05	-3.59596	-3.45049	7038	13516	6982	0.00014076	0.00027032	0.00013964	0.29174	237	-0.795154	964	-3.29269	1024
																																		-c
