# Supplementary material
Source: HighWire-hosted journal article supplement (doi:10.1101/rna.079752.123)

**Table S4.** Pearson’s correlation (R) of splicing efficiency with secondary structure parameters across several regions of the intron library.The sequence used for the ‘nearby’ context spanned from 15 bases upstream to 15 bases downstream of the N50, 80 bases total; the ‘barcode’ context spanned from the start of the barcode through 15 bases downstream of the N50, 124 bases total; the ‘upstream’ context spanned from the start of the 5’ UTR through 15 bases downstream of the N50, 174 bases total; and the ‘broad’ context spanned from the start of the 5’ UTR through 15 bases downstream of the intron, 259 bases total.Asterisks denote p-values < 5-16.


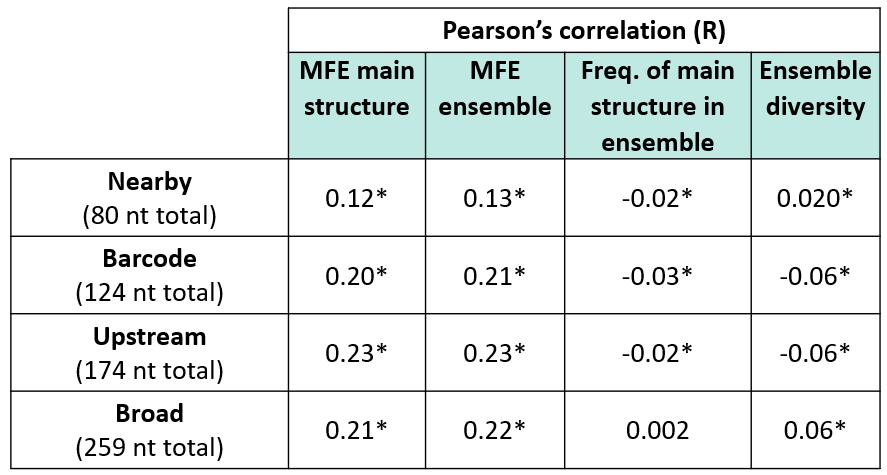

Supplement: Supplemental_TableS4.docx [file Supplemental_TableS4.docx]
