# Supplementary material
Source: HighWire-hosted journal article supplement (doi:10.1101/rna.079752.123)
Supplement: Supplemental_TableS5.docx [file Supplemental_TableS5.docx]

**Table S5.**Overview ofconvolutional neural network (CNN) model architectures. Each architecture was individually adapted to the length of the input sequence by adding or removing pooling layers. Each input sequence was used as a sequence in a one-hot encoding (a) or with additional structural channels of sequence plus accessibility (b) or sequence plus five structural elements (c). All models use 200 kernels,convolutional kernel length of 15. The bulleted model parameters appear in the order they were applied to each model. Steps that differ across the three sequence inputs are bold and underlined. Additional terms and abbreviations: the N50 sequence (input sequence #1), a 174 bp sequence from the start of the 5’ UTR through 15 bp 3' of the N50 (input sequence #2), a 228 bp sequence from the start of the 5’ UTR through the 15 bp 3’ of the intron (input sequence #3) learning rate (Lr), pooling width and stride (W), batch normalization layer (batch norm), dimension of the key, query and value embeddings used in the attention layer (dim. embedding), residual convolutional layer with residual skip connection (residual convolutions), convolutional layer with dilated kernels (dilated convolutions) and width/size of the kernels in the convolutional layer (L).

| **Model architecture** | **Input sequence 1** (N50) | **Input sequence 2** (174 bp) | **Input sequence 3** (228 bp) | **Pearson correlation R (test set 10%)** |
| --- | --- | --- | --- | --- |
| **Pooling CNN** | - ReLU - weighted mean pooling  **W = 15** - batch size = 16 - Lr = 1e-4 - MSE loss | - ReLU - weighted mean pooling  **W = 30** - batch size = 16 - Lr = 1e-4 - MSE loss | - ReLU - weighted mean pooling  **W = 40** - batch size = 16 - Lr = 1e-4 - MSE loss | (1a) R= 0.19  (2a) R= 0.23  (1b) R= 0.2  (2b) R= 0.25  (3b) R= 0.25  (1c) R= 0.2  (2c) R= 0.25  (3c) R= 0.25 |
| **Residual CNN** | - ReLU - batch norm + **4X** Dilated residual convolutions L = 4 (**dilation: 2,4,8,16**) + ReLU + weighted mean pooling W = 2 - Two fully connected layers + dropout 0.1 - batch size = 16 - Lr = 1e-4 - MSE loss | - ReLU - batch norm + **5X** Dilated residual convolutions L = 4 (**dilation: 2**) + ReLU + weighted mean pooling  W = 2 - Two fully connected layers + dropout 0.1 - batch size = 16 - Lr = 1e-4 - MSE loss | - ReLU - batch norm + **5X** Dilated residual convolutions L= 4 (**dilation: 2**) + ReLU +  weighted mean pooling  W = 2 - Two fully connected layers + dropout 0.1 - batch size = 16 - Lr = 1e-4 - MSE loss | (1a) R= 0.19  (2a) R= 0.24  (1b) R= 0.2  (2b) R= 0.25  (3b) R= 0.25  (1c) R= 0.2  (2c) R= 0.24  (3c) R= 0.25 |
| **Deep residual CNN** | - ReLU - batch norm + 5X residual convolutions L = 5 + ReLU - batch norm + **4X** Dilated residual convolutions L = 3 (**dilation: 2,4,8,16**) + ReLU + weighted mean pooling W = 2 - Two fully connected layers + dropout 0.1 - batch size = 16 - Lr = 1e-4 - MSE loss | - ReLU - batch norm + 5X residual convolutions L = 5 + ReLU - batch norm + **5X** Dilated residual convolutions L = 4 (**dilation: 2**) + ReLU+ weighted mean pooling  W = 2 - Two fully connected layers + dropout 0.1 - batch size = 16 - Lr = 1e-4 - MSE loss | - ReLU - batch norm + 5X residual convolutions L = 5 + ReLU - batch norm + **5X** Dilated residual convolutions L = 4 (**dilation: 2**) + ReLU +  weighted mean pooling  W = 2 - Two fully connected layers + dropout 0.1 - batch size = 16 - Lr = 1e-4 - MSE loss | (1a) R=0.2  (2a) R=0.23  (1b) R= 0.2  (2b) R= 0.25  (3b) R= 0.26  (1c) R= 0.21  (2c) R= 0.24  (3c) R= 0.25 |
| **Residual Attention CNN** | - ReLU - batch norm + **5X** residual convolutions L = 5 + ReLU - **4X** 6-head attention, dim. embedding 196, dropout = 0.1 + weighted pooling W = 2 - batch size = 16 - Lr = 1e-7 - MSE loss | - ReLU - **weighted pooling  W = 2** - batch norm + **3X** residual convolutions L = 5 + ReLU **+ weighted pooling W = 2** - **3X** 6-head attention, dim. embedding 196, dropout = 0.1 + weighted pooling W = 2 - batch size = 16 - Lr = 1e-7 - MSE loss | - ReLU - **weighted pooling  W = 2** - batch norm + **4X** residual convolutions L = 5 + ReLU **+ weighted pooling W = 2** - **3X** 6-head, dim. embedding 196, dropout = 0.1 + weighted pooling W = 2 - batch size = 16 - Lr = 1e-7 - MSE loss | (1a) R= 0.19  (2a) R= 0.23  (1b) R= 0.16  (3b) R= 0.23  (1c) R= 0.17  (3c) R= 0.22 |
| **Deep residual attention CNN** | - ReLU - batch norm + **5X** residual convolutions L = 5 + ReLU - **4X 6-head** attention, dim embedding 196, dropout = 0.1 - batch norm + **4X** residual convolutions L = 3 + ReLU + weighted mean pooling W = 2 - batch size = 16 - Lr = 1e-8 - MSE loss | - ReLU - **Weighted pooling  W = 2** - batch norm + **3X** residual convolutions L = 5 + ReLU - **3X 4-head** attention, dim embedding 196, dropout = 0.1 - batch norm + **2X** residual convolutions L = 3 + ReLU + weighted mean pooling W = 2 - batch size = 16 - Lr = 1e-8 - MSE loss | - ReLU - batch norm + **3X dilated** residual convolutions L = 5 (**dilations = 2**) + ReLU + **max-pooling W = 3** - **3X 4-head** attention, dim embedding 196, dropout = 0.1 - batch norm + **3X dilated** residual convolutions L = 3 (**dilation = 2**) + ReLU + weighted mean pooling  W = 2 - batch size = 16 - Lr = 1e-8 - MSE loss | (3b) R= 0.22 |
