# Supplementary material
Source: HighWire-hosted journal article supplement (doi:10.1101/rna.079752.123)
Supplement: Supplemental_TableS7.docx [file Supplemental_TableS7.docx]

**Table S7.** Overview of primers and oligos used for creation, analysis and sequencing of constructs. The letter N represents any base (*i.e*. A, C, G or T) and the letter V represents any base except thymine (*i.e*. A, C or G).

| **Name** | **Purpose** | **Sequence (5’ to 3’)** |
| --- | --- | --- |
| **Assembly of constructs and expression analysis** | | |
| MP1-F | Amplify GFP frameshift (fs) insert | ACACTAATCTAGAACTAGTGGATCCACAAAATGTCGTAAAGGTGAAGAATTATTCACTGG |
| MP2-R | AACTAATTACATGACTCGAGGTCGACTTATTTGTACAATTCATCCATACCATGGGTAATA |
| MP3-F | Amplify *p415-CYC1-GFPfs* by inverse PCR | GAATTATTCACTGGTGTTGTCCCAATTTTG |
| MP4-R | AAGTATAGTAATTTATGCTGCAAAGGTCCT |
| MP5 | *ACT1* intron oligo insert | AGGACCTTTGCAGCATAAATTACTATACTTCTATAGACACGCAAACACAAATACACACACTAAATTAATAATGTCTAAAGGTATGTTCTAGCGCTTGCACCATCCCATTTAACTGTAAGAAGAATTGCACGGTCCCAATTGCTCGAGAGATTTCTCTTTTACCTTTTTTTACTATTTTTCACTCTCCCATAACCTCCTATATTGACTGATCTGTAATAACCACGATATTATTGGAATAAATAGGGGCTTGAAATTTGGAAAAAAAAAAAAAACTGAAATATTTTCGTGATAAGTGATAGTGATATTCTTCTTTTATTTGCTACTGTTACTAAGTCTCATGTACTAACATCGATTGCTTCATTCTTTTTGTTGCTATATTATATGTTTAGGTGAAGAATTATTCACTGGTGTTGTCCCAATTTTG |
| MP6 | Shortened *ACT1* intron oligo insert | AGGACCTTTGCAGCATAAATTACTATACTTCTATAGACACGCAAACACAAATACACACACTAAGACACGCAAACACAATCTAGAACTAGTGGATCCACAAAATGTCTAAAGGTATGTTCTAGCGCTTGCACCATCCCATTTAACTGTTTTTATTTGCTACTGTTACTAAGTCTCATGTACTAACATCGATTGCTTCATTCTTTTTGTTGCTATATTATATGTTTAGGTGAAGAATTATTCACTGGTGTTGTCCCAATTTTG |
| MP7-F | Amplify *ACT1* and shortened *ACT1* intron oligo inserts | AGGACCTTTGCAGCATAAATTAC |
| MP8-R | CAAAATTGGGACAACACCAG |
| MP9 | 5’ UTR barcode oligo insert | AGGACCTTTGCAGCATAAATTACTATACTTCTATAGACACGCAAACACAAATACACACACTAAVVVVVVVVVVVVVVVTCTAGAACTAGTGGATCCACAAAATGTCTAAAG |
| MP10-F | Amplify 5’ UTR barcode insert oligos | AGGACCTTTGCAGCATAA |
| MP11-R | CTTTAGACATTTTGTGGATCC |
| MP12-F | Amplify *p415-CYC1-GFP-intron* by inverse PCR for insertion of barcode | TAGTGGATCCACAAAATGTCTAAAG |
| MP13 | Intron library and validation set oligo inserts | CTTTGCAGCATAAATTACTATACTTCTATAGACACGCAAACACAAATACACACACTAAVVVVVVVVVVVVVVVTCTAGAACTAGTGGATCCACAAAATGTCTAAAGGTATGTTCTAGNNNNNNNNNNNNNNNNNNNNNNNNNNNNNNNNNNNNNNNNNNNNNNNNNNTCATGTACTAACATCGATTGCTTCATTCTTTTT |
| MP14-F | Amplify intron library and validation set oligo inserts | AGGACCTTTGCAGCATAAATTACTATACTT |
| MP15-R | GCAACAAAAAGAATGAAGCAATCGA |
| MP16-F | Amplify *p415-CYC1-GFP-intron* by inverse PCR for insertion of intron library and validation set | CGATTGCTTCATTCTTTTTGTTGCTATATT |
| MP17-F | Amplify *p415-CYC1-GFP-ACT1intron* | TACACACACTAAATTAATAATGTCTAAAGG |
| MP18-R | ACCGAAAGTAGTGACTAAGG |
| MP19-F | Amplify *p415-CYC1-GFP-shortenedACT1intron* | CGCAAACACAAATACACACAC |
| **Preparation of samples for sequencing** | | |
| MP20-R | Reverse transcribe RNA and add an 8-nuleotide-long unique molecular ID (UMI) | GATCAATGAGAAACAGACTTGTCAAGTAACNNNNNNNNTAAGGTCAATTTACCGTAAGTAGC |
| MP21-F | Amplify cDNA and DNA and add sample index and Illumina P5 adapter | AATGATACGGCGACCACCGAGATCTACACNNNNNNNNCATAAATTACTATACTTCTATAGACACGCAAACAC |
| MP22-R | Amplify DNA and add Illumina P7 adapter for subassembly | CAAGCAGAAGACGGCATACGAGATACATGTCACCTAAACATATAATATAGCAACAAAAAGAATGAAGCAATC |
| MP23-R | Amplify cDNA and add Illumina P7 adapter | CAAGCAGAAGACGGCATACGAGATTGTACACAGATCAATGAGAAACAGACTTGTCAAGTAAC |
| MP24-R | Amplify DNA and add Illumina P7 adapter | CAAGCAGAAGACGGCATACGAGATACATGTCATAAGGTCAATTTACCGTAAGTAGCATCA |
| **Sequencing of constructs** | | |
| MP25-F | Read 1 primer for subassembly sequencing | TCTAGAACTAGTGGATCCACAAAATGTCTAAAGGTATGTTCTAG |
| MP26-R | Read 2 primer for subassembly sequencing | CCTAAACATATAATATAGCAACAAAAAGAATGAAGCAATCGATGTTAGTACATGA |
| MP27-F | Index 1 primer for subassembly sequencing and Read 1 primer for sequencing cDNA and DNA | CATAAATTACTATACTTCTATAGACACGCAAACACAAATACACACACTAA |
| MP28-R | Index 2 primer for subassembly sequencing | CTAGAACATACCTTTAGACATTTTGTGGATCCACTAGTTCTAGA |
| MP29-R | Read 2 primer for sequencing cDNA and DNA | CTAATTCAACCAAAATTGGGACAACACCAGTGAATAATTCTTCAC |
| MP30-F | Index 1 primer for sequencing cDNA and DNA | GTGAAGGTGAAGGTGATGCTACTTACGGTAAATTGACCTTA |
| MP31-R | Index 2 primer for sequencing cDNA and DNA | TTAGTGTGTGTATTTGTGTTTGCGTGTCTATAGAAGTATAGTAATTTATG |
